# Supplementary material for: PRactice of VENTilation in Middle-Income Countries (PRoVENT-iMIC): rationale and protocol for a prospective international multicentre observational study in intensive care units in Asia
Source: PubMed Central journal article supplement — BMJ Open. 2018 Apr 28;8(4):e020841. doi: 10.1136/bmjopen-2017-020841 (PMC5931304; doi:10.1136/bmjopen-2017-020841), 2018-04-28
Supplement: bmjopen-2017-020841.draft_revisions.pdf [file bmjopen-2017-020841.draft_revisions.pdf]

# BMJ Open

BMJ Open is committed to open peer review. As part of this commitment we make the peer review history of every article we publish publicly available.

When an article is published we post the peer reviewers' comments and the authors' responses online. We also post the versions of the paper that were used during peer review. These are the versions that the peer review comments apply to.

The versions of the paper that follow are the versions that were submitted during the peer review process. They are not the versions of record or the final published versions. They should not be cited or distributed as the published version of this manuscript.

BMJ Open is an open access journal and the full, final, typeset and author-corrected version of record of the manuscript is available on our site with no access controls, subscription charges or pay-per-view fees (<http://bmjopen.bmj.com>).

If you have any questions on BMJ Open's open peer review process please email [info.bmjopen@bmj.com](mailto:info.bmjopen@bmj.com)

# BMJ Open

## PRactice of VENTilation in Middle–Income Countries (PRoVENT–iMIC) – rationale and protocol for a prospective international multicentre observational study in ICUs in Asia

|                               |                                                                                                                                                                                                                                                                                                                                                                                                                                                                                                                                                                                                                                                                                                                                                                                                                                                                                                                                                                                                                                                                                                                                                                                                                                                                                                                                                                                                                                                                                                                                                                                                                                                                                                                                                                                                                                                                                                                                                                                                                                                                                                                                                                                                                                                                                                                                                                        |
|-------------------------------|------------------------------------------------------------------------------------------------------------------------------------------------------------------------------------------------------------------------------------------------------------------------------------------------------------------------------------------------------------------------------------------------------------------------------------------------------------------------------------------------------------------------------------------------------------------------------------------------------------------------------------------------------------------------------------------------------------------------------------------------------------------------------------------------------------------------------------------------------------------------------------------------------------------------------------------------------------------------------------------------------------------------------------------------------------------------------------------------------------------------------------------------------------------------------------------------------------------------------------------------------------------------------------------------------------------------------------------------------------------------------------------------------------------------------------------------------------------------------------------------------------------------------------------------------------------------------------------------------------------------------------------------------------------------------------------------------------------------------------------------------------------------------------------------------------------------------------------------------------------------------------------------------------------------------------------------------------------------------------------------------------------------------------------------------------------------------------------------------------------------------------------------------------------------------------------------------------------------------------------------------------------------------------------------------------------------------------------------------------------------|
| Journal:                      | <i>BMJ Open</i>                                                                                                                                                                                                                                                                                                                                                                                                                                                                                                                                                                                                                                                                                                                                                                                                                                                                                                                                                                                                                                                                                                                                                                                                                                                                                                                                                                                                                                                                                                                                                                                                                                                                                                                                                                                                                                                                                                                                                                                                                                                                                                                                                                                                                                                                                                                                                        |
| Manuscript ID                 | bmjopen-2017-020841                                                                                                                                                                                                                                                                                                                                                                                                                                                                                                                                                                                                                                                                                                                                                                                                                                                                                                                                                                                                                                                                                                                                                                                                                                                                                                                                                                                                                                                                                                                                                                                                                                                                                                                                                                                                                                                                                                                                                                                                                                                                                                                                                                                                                                                                                                                                                    |
| Article Type:                 | Protocol                                                                                                                                                                                                                                                                                                                                                                                                                                                                                                                                                                                                                                                                                                                                                                                                                                                                                                                                                                                                                                                                                                                                                                                                                                                                                                                                                                                                                                                                                                                                                                                                                                                                                                                                                                                                                                                                                                                                                                                                                                                                                                                                                                                                                                                                                                                                                               |
| Date Submitted by the Author: | 27-Nov-2017                                                                                                                                                                                                                                                                                                                                                                                                                                                                                                                                                                                                                                                                                                                                                                                                                                                                                                                                                                                                                                                                                                                                                                                                                                                                                                                                                                                                                                                                                                                                                                                                                                                                                                                                                                                                                                                                                                                                                                                                                                                                                                                                                                                                                                                                                                                                                            |
| Complete List of Authors:     | <p>Pisani, Luigi; Mahidol Oxford Tropical Medicine Research Unit; AMC, Intensive Care<br/>         Algera, Anna; AMC, Intensive Care<br/>         Serpa Neto, Ary; Hospital Israelita Albert Einstein<br/>         Ahsan, Areef ; Bangladesh Institute of Research and Rehabilitation in Diabetes Endocrines and Metabolic Disorders, Department of Critical Care<br/>         Beane, Abi; Network for Improving Critical Care Systems and Training; Mahidol Oxford Tropical Medicine Research Unit<br/>         Chittawatanarat, Kaweesak ; Chiang Mai University, Surgery<br/>         Faiz, Abul; Mahidol Oxford Tropical Medicine Research Unit; Dev Care Foundation<br/>         Haniffa, Rashan; National Intensive Care Surveillance, NICS<br/>         Hashemian, Reza; Shaheed Beheshti University of Medical Sciences, National Research Institute of Tuberculosis and Lung Diseases<br/>         Hashmi, Madiha; Aga Khan University, Department of Anaesthesiology<br/>         Imad, Hisham; Mahidol University Faculty of Tropical Medicine, Department of Clinical Tropical Medicine<br/>         Indraratna, Kanishka; Sri Jayewardenepura General Hospital, Department of Intensive Care<br/>         Iyer, Shivakumar ; Bharati Vidyapeeth University Medical College and Hospital, Department of Medicine<br/>         Kayastha, Gyan; Patan Academy of Health Sciences, Department of Internal Medicine<br/>         Krishna, Bhuvana ; St John's Medical College, Department of Critical Care Medicine<br/>         Moosa, Hassan; Indira Gandhi Memorial Hospital, Department of Intensive Care<br/>         Nadjm, Behzad; National Hospital for Tropical Diseases, Oxford University Clinical Research Unit<br/>         Pattnaik, Rajyabardhan; Ispat General Hospital, Critical Care Unit<br/>         Sampath, Sriram; St John's Medical College, Department of Critical Care Medicine<br/>         Thwaites, Louise; Oxford University Clinical Research Unit, Hospital for Tropical Diseases<br/>         Tun, Ni Ni; Medical Action Myanmar<br/>         Yunos, Nor'Azim; Monash University - Malaysia Campus, Jeffrey Cheah School of Medicine and Health Sciences<br/>         Grasso, Salvatore; Università degli Studi di Bari Dipartimento Emergenza e Trapianti di Organi<br/>         Paulus, Frederique; AMC, Intensive Care</p> |

1  
2  
3  
4  
5  
6  
7  
8  
9  
10  
11  
12  
13  
14  
15  
16  
17  
18  
19  
20  
21  
22  
23  
24  
25  
26  
27  
28  
29  
30  
31  
32  
33  
34  
35  
36  
37  
38  
39  
40  
41  
42  
43  
44  
45  
46  
47  
48  
49  
50  
51  
52  
53  
54  
55  
56  
57  
58  
59  
60

|           |                                                                                                                                                                                                                                                                                                                                                                                                                                                                                                                                           |
|-----------|-------------------------------------------------------------------------------------------------------------------------------------------------------------------------------------------------------------------------------------------------------------------------------------------------------------------------------------------------------------------------------------------------------------------------------------------------------------------------------------------------------------------------------------------|
|           | De Abreu, Marcelo Gama; University Hospital Carl Gustav Carus, and Technische Universität Dresden, 18Pulmonary Engineering Group, Department of Anesthesiology and Intensive Care Medicine<br>Pelosi, Paolo; IRCCS Azienda Ospedaliera Universitaria San Martino - IST Istituto Nazionale per la Ricerca sul Cancro, Department of Surgical Sciences and Integrated Diagnostics<br>Dondorp, Arjen; Mahidol Oxford Tropical Medicine Research Unit<br>Schultz, Marcus; AMC, Intensive Care; Mahidol Oxford Tropical Medicine Research Unit |
| Keywords: | mechanical ventilation, invasive ventilation, ARDS, outcomes, middle-income countries, resource-limited settings                                                                                                                                                                                                                                                                                                                                                                                                                          |
|           |                                                                                                                                                                                                                                                                                                                                                                                                                                                                                                                                           |

For peer review only

SCHOLARONE™  
Manuscripts

# PRactice of VENTilation in Middle–Income Countries (PRoVENT–iMIC) – rationale and protocol for a prospective international multicentre observational study in ICUs in Asia

Luigi Pisani,<sup>1,21</sup> Anna Geke Algera,<sup>1</sup> Ary Serpa Neto,<sup>1,3</sup> Areef Ahsan,<sup>4</sup> Abigail Beane,<sup>21</sup> Kaweesak Chittawatanarat,<sup>5</sup> Abul Faiz,<sup>6,21</sup> Rashan Haniffa,<sup>21</sup> Reza Hashemian,<sup>7</sup> Madiha Hashmi,<sup>8</sup> Hisham Ahmed Imad,<sup>9</sup> Kanishka Indraratna,<sup>10</sup> Shivakumar Iyer,<sup>11</sup> Gyan Kayastha,<sup>12</sup> Bhuvana Krishna,<sup>13</sup> Hassan Moosa,<sup>14</sup> Behzad Nadjm,<sup>20</sup> Rajyabardhan Pattnaik,<sup>15</sup> Sriram Sampath,<sup>13</sup> Louise Thwaites,<sup>16</sup> Ni Ni Tun,<sup>17</sup> Nor'azim Mohd Yunos,<sup>18</sup> Salvatore Grasso,<sup>19</sup> Frederique Paulus,<sup>1</sup> Marcelo Gama de Abreu,<sup>18</sup> Paolo Pelosi,<sup>19</sup> Arjen M. Dondorp,<sup>1,21</sup> and Marcus J. Schultz,<sup>1,2,21</sup>

for the PRoVENT–iMIC investigators, MORU\* and the PROVE network\*\*

## **Academic Medical Center, Amsterdam, The Netherlands:**

<sup>1</sup>Department of Intensive Care

<sup>2</sup>Laboratory of Experimental Intensive Care and Anesthesiology (L·E·I·C·A)

## **Hospital Israelita Albert Einstein, São Paulo, Brazil:**

<sup>3</sup>Department of Intensive Care Medicine

## **BIRDEM General Hospital, Dhaka, Bangladesh:**

<sup>4</sup>Department of Critical Care

## **Chiang Mai University, Chiang Mai, Thailand:**

<sup>5</sup>Department of Surgery

## **Dev Care Foundation, Bangladesh**

## **Shahid Beheshti University of Medical Sciences, Tehran, Iran:**

<sup>7</sup>National Research Institute of Tuberculosis and Lung Diseases

## **Aga Khan University, Karachi, Pakistan:**

<sup>8</sup>Department of Anesthesiology

## **Faculty of Tropical Medicine, Mahidol University, Bangkok, Thailand:**

<sup>9</sup>Department of Clinical Tropical Medicine

## **Indira Gandhi Memorial Hospital, Malé, Maldives:**

<sup>14</sup> Department of Intensive Care

## **Sri Jayewardenepura General Hospital, Nugegoda, Sri Lanka:**

<sup>10</sup>Department of Anesthesia and Intensive Care

**Bharati Vidyapeeth Medical College, Pune, India:**

<sup>11</sup>Department of Medicine

**Patan Academy of Health Science, Kathmandu, Nepal:**

<sup>12</sup>Department of Internal Medicine

**St. John's Medical College, Bangalore, India:**

<sup>13</sup>Department of Critical Care Medicine

**Ispat General Hospital, Rourkela, India:**

<sup>15</sup>Critical Care Unit

**Oxford University Clinical Research Unit, Ho Chi Minh City, Vietnam**

<sup>16</sup>Hospital for Tropical Diseases

**<sup>17</sup>Medical Action Myanmar, Naypyidaw Myanmar:**

**Monash University Malaysia, Johor, Malaysia:**

<sup>18</sup>Jeffrey Cheah School of Medicine and Health Sciences

**University of Bari, Bari, Italy:**

<sup>19</sup>Department of Emergency and Organ Transplantation (DETO)

**University Hospital Carl Gustav Carus, and Technische Universität Dresden,**

**Dresden, Germany:**

<sup>18</sup>Pulmonary Engineering Group, Department of Anesthesiology and Intensive Care  
Medicine

**San Martino Policlinico Hospital - IRCCS for Oncology, University of Genoa,  
Genoa, Italy:**

<sup>19</sup>Department of Surgical Sciences and Integrated Diagnostics

**National Hospital for Tropical Diseases, Hanoi, Vietnam**

<sup>20</sup>Oxford University Clinical Research Unit

**Faculty of Tropical Medicine, Mahidol University, Bangkok, Thailand:**

<sup>21</sup>Mahidol–Oxford Tropical Medicine Research Unit (MORU)

\*MORU, the Mahidol Oxford Tropical Medicine Research Unit, Bangkok, Thailand

([www.tropmedres.ac](http://www.tropmedres.ac))

\*\*PROVE Network, the Protective Ventilation Network ([www.provenet.eu](http://www.provenet.eu))

Word count manuscript: 3974 words (abstract: 300 words)

Number of inserts: 2 tables and 2 figures

**Correspondence:**

Luigi Pisani, study coordinator

Mahidol–Oxford Tropical Medicine Research Unit (MORU)

Faculty of Tropical Medicine, Mahidol University

3rd Floor, 60th Anniversary Chulalongkornrajavidyalaya Building

420/6 Rajvithi Road, Bangkok 10400, Thailand

E-mail: [luigipisani@gmail.com](mailto:luigipisani@gmail.com)

## ABSTRACT

### *Introduction*

Current evidence on epidemiology and outcomes of invasively mechanically ventilated intensive care unit (ICU) patients is predominantly gathered in resource-rich settings. Patient case-mixes and patterns of critical illnesses, and probably also ventilation practices are likely to be different in resource-limited settings. We aim to investigate the epidemiological characteristics, ventilation practices and clinical outcomes of patients receiving mechanical ventilation in ICUs in Asia.

### *Methods and analysis*

PRoVENT-iMIC (study of PRactice of VENTilation in Middle Income Countries) is an international multicentre observational study to be undertaken in approximately 60 ICUs in 11 Asian countries. Consecutive patients aged 18 years or older who are receiving invasive ventilation in participating ICUs during a predefined 28-day period are to be enrolled, with a daily follow-up of 7 days. The primary outcome is ventilatory management (including tidal volume [ $V_T$ ] expressed as mL/kg predicted bodyweight [PBW], and positive end-expiratory pressure [PEEP] expressed as cm H<sub>2</sub>O) during the first three days of mechanical ventilation – compared between patients at no risk for ARDS, patients at risk for ARDS and in patients with ARDS (in case the diagnosis of ARDS can be made on admission). Secondary outcomes include occurrence of pulmonary complications and all-cause ICU mortality. The PRoVENT-iMIC study is registered at ClinicalTrials.gov, NCT 03188770.

### *Ethics and dissemination*

PRoVENT-iMIC will be the first international study that prospectively assesses ventilation practices, outcomes and epidemiology of invasively ventilated patients in

1  
2  
3 ICUs in Asia. The results of this large study, to be disseminated through conference  
4 presentations and publications in international peer-reviewed journals, are of ultimate  
5 importance when designing trials of invasive ventilation in resource-limited ICUs.  
6  
7  
8  
9  
10 Access to source data will be made available through national or international  
11 anonymized datasets upon request and after agreement of the PRoVENT-iMIC steering  
12 committee.  
13  
14  
15

16  
17 **KEYWORDS:** mechanical ventilation; invasive ventilation; ARDS; outcomes; middle-  
18 income countries; resource-limited settings.  
19

20  
21 **TRIAL REGISTRATION:** PRoVENT-iMIC is registered at [www.clinicaltrials.gov](http://www.clinicaltrials.gov) with trial  
22 identification number NCT 03188770.  
23  
24  
25

#### 26 27 28 **STRENGTHS AND LIMITATIONS OF THIS STUDY:** 29

- 30  
31 • PRoVENT-iMIC is an international multicentre observational study with a wide  
32 representation of Asian countries, allowing inferences on epidemiology,  
33 management and outcomes of mechanical ventilation across the entire  
34 subcontinent.  
35  
36
- 37  
38 • The attention on ventilation practice will provide robust data on this specific  
39 domain while the 7 days follow-up will allow precise recording of pulmonary  
40 complications at their origin.  
41  
42  
43
- 44  
45 • The study will have a sample size large enough to obtain precise estimates of  
46 pulmonary complications and ICU mortality and to examine potential associations  
47 between ventilation practice and these outcomes.  
48  
49
- 50  
51 • One limitation is the potential constraint of laboratory data, generating a limited  
52 dataset not comprising daily severity scores useful for statistical controlling  
53 purposes.  
54  
55  
56  
57  
58  
59

- 1  
2  
3  
4  
5  
6  
7  
8  
9  
10  
11  
12  
13  
14  
15  
16  
17  
18  
19  
20  
21  
22  
23  
24  
25  
26  
27  
28  
29  
30  
31  
32  
33  
34  
35  
36  
37  
38  
39  
40  
41  
42  
43  
44  
45  
46  
47  
48  
49  
50  
51  
52  
53  
54  
55  
56  
57  
58  
59  
60
- The conceivable limitation in blood gas analysis and imaging examinations may limit the documentation of insurgence or worsening of ARDS and other pulmonary complications.

For peer review only



## INTRODUCTION

Invasive mechanical ventilation is a frequently applied intervention in patients in intensive care units (ICUs) and a mandatory strategy in patients under general anaesthesia for surgery. There is increased understanding how invasive ventilation can harm the lungs, in ICU patients with the acute respiratory distress syndrome (ARDS) [1], as well as in ICU patients with less injured or uninjured lungs, and in surgery patients who usually have healthy lungs [2]. A central cause is that invasive ventilation with positive pressure may overdistend one lung area while failing to recruit another, compromising gas exchange but also, and more importantly, increasing or inducing pulmonary injury. There is convincing evidence that this harm can be partly prevented by adjusting volume and pressure settings on the ventilator. Indeed, use of low tidal volumes ( $V_T$ ) [3–5], to prevent overdistension, and sufficient positive end–expiratory pressure (PEEP) [3,5,6], to prevent alveolar collapse or atelectrauma, have both been found to improve outcomes of various types of patients, and their use is increasingly recommended [7–9].

Practice of invasive ventilation has evolved over time, with a more extensive use of ventilator settings that are proven to prevent against so–called ventilator–induced lung injury. The recent LUNG SAFE (‘Large observational study to UNderstand the Global impact of Severe Acute respiratory Failure’) showed that by now up to two in every three patients with ARDS receive so–called lung–protective ventilation[10]. Results of PRoVENT (‘PRactice of VENTilation in critically ill patients without ARDS at onset of ventilation study’) are in line with those from LUNG SAFE, showing that one in every two ICU patients without ARDS receive ventilation with lung–protective settings[11]. Results of LAS VEGAS (‘Local ASsessment of VEntilatory management during General

1  
2  
3 Anaesthesia for Surgery study') even suggests increased use of lung-protective  
4 ventilation in the operating rooms [12]. It should be noticed, though, that LUNG SAFE,  
5  
6  
7  
8  
9  
10  
11  
12  
13  
14  
15  
16  
17  
18  
19  
20  
21  
22  
23  
24  
25  
26  
27  
28  
29  
30  
31  
32  
33  
34  
35  
36  
37  
38  
39  
40  
41  
42  
43  
44  
45  
46  
47  
48  
49  
50  
51  
52  
53  
54  
55  
56  
57  
58  
59  
60  
Anaesthesia for Surgery study') even suggests increased use of lung-protective ventilation in the operating rooms [12]. It should be noticed, though, that LUNG SAFE, PRoVENT, and LAS VEGAS were mainly performed in high-income countries, and exclusively recruiting patients in resource-rich centres, which limits the generalizability of their results to lower-income countries and resource-limited settings. Historical descriptions of cohorts of invasively ventilated patients in resource-poor settings have been published, but these were all small in size, and while suggesting the existence of ventilator-related deaths they largely failed to report key ventilator parameters [13–15]. Continued use of high  $V_T$  has been reported in a recent Brazilian study [16], while a study from India suggests a change towards the use of lower  $V_T$  [17].

There are several reasons to consider important differences with regard to practice of ventilation between resource-rich and resource-limited settings. The disparity in resources may limit the availability as well as the safety of certain ventilator settings [18]. Awareness of the impact of invasive ventilation on lung tissue, and the benefit of using lung-protective ventilation settings could be severely limited [19].  $V_T$  and PEEP may be poorly titrated due to insufficient staffing, and due to the absence of arterial blood gas monitoring, pulse oximetry or capnography [20]. Other reasons not to implement use of low  $V_T$  and sufficient levels of PEEP include alleged side effects associated with their use, like the need for higher respiratory rates, increased sedation requirements, and even the promotion of patient-ventilator asynchrony. As invasive ventilation with higher PEEP may cause hemodynamic instability, limited access to fluids and vasoactive drugs may hamper its use. Finally, as resource-poor ICUs are usually situated in tropical countries their case-mix and indications for invasive ventilation are strikingly different [17].

1  
2  
3 To gain a better insight into the ventilation practice, outcomes and  
4 epidemiological characteristics of ICU patients receiving invasive ventilation in resource-  
5 limited settings, we plan to perform the PRoVENT-iMIC ('Practice of VENTilation in  
6 Middle-Income Countries study'), a prospective observational cohort study in ICUs in  
7 Asia. We also aim to describe the association between certain ventilator settings and  
8 patient-centred outcomes. We hypothesize that practice of ventilation is highly variable,  
9 in particular with respect to  $V_T$  and PEEP settings. This understanding is fundamental to  
10 planning any intervention study in these countries in the future.  
11  
12  
13  
14  
15  
16  
17  
18  
19  
20  
21  
22  
23  
24  
25  
26  
27  
28  
29  
30  
31  
32  
33  
34  
35  
36  
37  
38  
39  
40  
41  
42  
43  
44  
45  
46  
47  
48  
49  
50  
51  
52  
53  
54  
55  
56  
57  
58  
59  
60

## **METHODS and ANALYSIS**

### *Design and Setting*

PRoVENT-iMIC is an international multicentre observational study in consecutive ICU patients receiving invasive mechanical ventilation during a 28-day period, expected to run in approximately 60 centres in the following Asian countries: Thailand, Vietnam, Myanmar, Pakistan, Nepal, Bangladesh, Malaysia, Sri Lanka, Maldives, Iran and India. These countries belong to the low or middle-income economies, as classified by the World Bank[21]. PRoVENT-iMIC is conducted in accordance with the declaration of Helsinki and is registered at [www.clinicaltrials.gov](http://www.clinicaltrials.gov) (trial identification number NCT 03188770). Figure 1 shows the study flow-chart.

### *Study population*

Consecutive patients intubated for ventilation during a predefined period of 28 days will be enrolled. Inclusion is not restricted to patients who are intubated in the ICU: also patients who started invasive ventilation in the emergency room, normal ward, community, or operating room directly preceding the present ICU admission are eligible for participation. The exclusion criteria include age < 18 years, use of non-invasive ventilation not followed by invasive ventilation, patients whose invasive mechanical ventilation started before the 28-day period of inclusion, and patients transferred from another hospital under invasive ventilation.

Patients will be stratified in three groups for comparison of the primary and secondary endpoints: patients without ARDS, patients without but at risk for development of ARDS, according to the Lung Injury Prediction Score (LIPS) [22], and patients with ARDS, according to the Berlin Definition[23]. Patients with ARDS will also

1  
2  
3 be stratified according to severity of ARDS, based on the oxygenation (mild, moderate  
4 and severe ARDS categories).  
5  
6

### 7 *Study conduct*

8  
9  
10 Local investigators will screen all patients who start invasive ventilation in one of the  
11 participating ICUs during a predefined period of 28-day, lasting from 8:00 AM on the  
12 Monday of the first week to 7.59 AM on the Monday four weeks later. The exact starting  
13 date will be flexible for participating centres and shall be determined by the national  
14 study coordinator, but all sites must have started before October 1, 2018.  
15  
16  
17  
18  
19  
20

### 21 *Data to be collected*

22  
23 Baseline and demographic variables will be collected on the day of admission, including  
24 gender, age, actual or estimated weight and height, smoking status, comorbidities  
25 including chronic obstructive pulmonary disease (COPD), active cancer, heart failure,  
26 diabetes mellitus, chronic kidney failure, liver cirrhosis and arterial hypertension, the  
27 presence of ARDS according to the Berlin Definition, the LIPS, reason for ICU  
28 admission. On the day of start of invasive ventilation we will document the reason for  
29 starting mechanical ventilation, and whether the patient received non-invasive ventilation  
30 before intubation.  
31  
32  
33  
34  
35  
36  
37  
38  
39  
40  
41

42 Every day, until day 3 from admission in the ICU, until ICU discharge or death,  
43 whichever comes first, the ventilation status and ventilation characteristics will be  
44 collected, including ventilation mode,  $V_T$  size, respiratory rate (set and measured), peak  
45 and plateau (with volume-controlled modes) or maximum airway pressure (with  
46 pressure-controlled modes), PEEP, inspired oxygen fraction, peripheral oxygen  
47 saturation, blood gas analysis data when available ( $\text{PaO}_2$ ,  $\text{PaCO}_2$ , arterial bicarbonate,  
48  
49  
50  
51  
52  
53  
54  
55  
56  
57  
58  
59  
60

1  
2  
3 arterial pH), end-tidal CO<sub>2</sub>, when available and hemodynamic parameters like heart rate  
4  
5 and systolic blood pressure.  
6

7  
8 Every day, until day 7, ICU discharge or death, whichever comes first, the  
9  
10 occurrence of pulmonary complications will be scored, including new requirement of  
11  
12 invasive ventilation after initial extubation, pulmonary infections, atelectasis,  
13  
14 pneumothorax, pleural effusions, new pulmonary infiltrates and development or  
15  
16 worsening of ARDS.  
17

18  
19 On the day of ICU discharge (maximum 60 days after recruitment) outcome will  
20  
21 be recorded as follows: death, discharge to ward, to medium care or high dependency  
22  
23 unit, discharge to home for palliative care, or transfer to another ICU. The date of  
24  
25 extubation, reintubation and tracheostomy (if performed) will also be recorded in this  
26  
27 moment.  
28

### 29 30 *Study endpoints*

31  
32 The primary endpoint is V<sub>T</sub>-size in millilitres per kilogram of predicted body weight  
33  
34 (ml/kg PBW) and PEEP in centimetres of water (cm H<sub>2</sub>O) used amongst diverse ICU  
35  
36 patient categories during the first three days of mechanical ventilation. Secondary  
37  
38 clinical endpoints include other ventilation parameters (including respiratory system  
39  
40 driving pressure), the proportion of patients at risk of ARDS as stratified by the LIPS, or  
41  
42 ARDS defined by the Berlin Definition, the occurrence of pulmonary complications,  
43  
44 length of stay in ICU, duration of invasive ventilation and all-cause ICU-mortality.  
45  
46  
47

### 48 49 *Definitions*

50  
51 All cause ICU-mortality is defined as any death in the ICU. ICU length of stay is defined  
52  
53 as the time between ICU admission and ICU discharge or death in ICU. The number of  
54  
55 days of ventilation is defined as time between endotracheal intubation and successful  
56  
57  
58

1  
2  
3 extubation (in case of intermittent mechanical ventilation via a tracheostomy, every day  
4 a patient needs ventilation counts as one extra day, irrespective of the duration of  
5 ventilation on that specific day). In case of non-invasive ventilation, the duration will be  
6 assessed separated from the assessment of invasive ventilation.  
7  
8  
9  
10

11  
12 Only pulmonary complications that occur after the first 24 hours of invasive  
13 ventilation will be considered in analysis, as events preceding this time point may very  
14 well be considered the potential reason for intubation. A pulmonary infection requires the  
15 presence of new or changed lung opacities on chest radiography and/or new or changed  
16 sputum plus at least a temperature  $> 38.3$  °C or a white blood cell count  $>12,000$  per  
17 microliter of blood. Atelectasis require the presence of increased density (lung opacity)  
18 on one or more chest radiographs with displacement of the fissures toward the area of  
19 atelectasis, crowding of pulmonary vessels and bronchi in the atelectatic region, upward  
20 displacement of hemidiaphragm ipsilateral to the side of atelectasis, that may be  
21 accompanied by shift of the mediastinum or hilum towards the affected area and  
22 compensatory overinflation in the unaffected lung [24]. Pleural effusion is suggested by  
23 lung opacification with shift of the mediastinum, hilum or hemi-diaphragm towards the  
24 non-affected area. Pneumothorax requires the presence of air in the pleural space with  
25 no vascular bed surrounding the visceral pleura. ARDS is defined according to the Berlin  
26 Definition [23] with alternative oxygenation criteria based on  $SpO_2/FiO_2$  applicable only  
27 when blood gas analysis data is unavailable (Table 1a and 1b) [25,26]. Worsening of  
28 ARDS is defined as any change in the prior classification (i.e., from mild to moderate or  
29 severe ARDS, or from moderate to severe ARDS).  
30  
31  
32  
33  
34  
35  
36  
37  
38  
39  
40  
41  
42  
43  
44  
45  
46  
47  
48  
49  
50  
51  
52

### 53 *Data management*

54  
55  
56  
57  
58  
59  
60

1  
2  
3 Data will be collected from a paper medical chart, or an electronic patient data  
4 management system if available. Local investigators transcribe the collected data  
5 directly onto an anonymized internet-based electronic CRF (REDCap – Research  
6 Electronic Data Capture[27], [www.projectredcap.org](http://www.projectredcap.org)). In some centres data may be  
7 recorded on paper CRF and successively transcribed on the electronic CRF at a later  
8 time point. Access to the data-entry system is protected by a personalized username  
9 and password. The data will be kept on a central secured server located at the Hospital  
10 Israelita Albert Einstein, Sao Paulo, Brazil. The structure of the electronic CRF is  
11 detailed in Figure 2. A screening-log with limited patient data will be completed with all  
12 the included and excluded patients during the enrolment window. Participating centres  
13 are instructed to enter data for the daily follow-up using values obtained as close as  
14 possible to 08:00 AM, but only when the patient is stable at that time point. The study  
15 day for the recording of pulmonary complications will be defined as the natural 24h  
16 period from 00:00 until 23:59, to ensure that data is captured only once. Data for ICU-  
17 discharge will be collected until a maximum of 60 days after ICU admission, after which  
18 the CRF for that patient will be closed.

### 39 *Study sites*

40  
41 PRoVENT-iMIC will be conducted in 11 Asian countries, with a varying number of ICUs  
42 per country. Participating ICUs are selected on the basis of willingness to participate.  
43  
44 There are no a priori established requirements for participation, and private as well as  
45 public centres are eligible to represent real-life practices. A one-time web-based pre-  
46 study survey on structure, organizational aspects and delivery of care in the participating  
47 centres will be performed.

### 54 *Statistical Analysis Plan*



1  
2  
3 No formal sample size calculation was performed, but we expect each centre to enrol 20  
4  
5 to 40 patients in the allocated time period, yielding a total of 1,200 to 2,400 patients. We  
6  
7 consider this figure sufficient to analyse the study endpoints.  
8  
9

10 Normally distributed variables will be expressed by their mean and standard  
11 deviation; not normally distributed variables will be expressed by their medians and  
12 interquartile ranges; categorical variables will be expressed as n (%). In test groups of  
13  
14 continuous normally distributed variables, Student's t-test will be used. Likewise if  
15  
16 continuous data are not normally distributed the Mann Whitney U test will be used.  
17  
18 Categorical variables will be compared with the Chi-square test or Fisher's exact test or  
19  
20 when appropriate as relative risks. Statistical uncertainty will be expressed by 95%  
21  
22 confidence levels.  
23  
24  
25  
26  
27

28 The primary outcome ( $V_T$  size [ml/kg PBW] and PEEP [cm H<sub>2</sub>O] levels during the  
29 first three days of mechanical ventilation) – will be analysed and compared between  
30  
31 patients at no risk for ARDS, patients at risk for ARDS and in patients with ARDS (in  
32  
33 case the diagnosis of ARDS could be made on admission). If the data is normally  
34  
35 distributed, one way Analysis of Variance (ANOVA) or two-way ANOVA assessing the  
36  
37 time–interaction between groups and days of observation will be used. When not  
38  
39 normally distributed the Kruskal–Wallis test or Friedman test assessing the time–  
40  
41 interaction between groups and days of observation will be used.  
42  
43  
44  
45  
46

47 Univariate analysis will be performed to identify potential factors associated with  
48 outcomes including, but not limited to, ventilator settings (in particular  $V_T$  and PEEP). A  
49  
50 multivariate logistic regression model will be used to determine which of those factors  
51  
52 are independent. A stepwise approach will be used to enter new terms into the model,  
53  
54  
55  
56  
57  
58  
59  
60

1  
2  
3 with a limit of  $P < 0.2$  to enter the terms. Time to event variables is analysed using Cox  
4 regression and visualized by Kaplan–Meier.  
5  
6

7 Time–course variables (e.g. repeated measures of ventilator parameters, vital  
8 signs, oxygenation parameters and others) are also analysed by linear mixed model.  
9  
10 The linear mixed models procedure expands the generalized linear model (GLM) so that  
11 the data are permitted to exhibit correlated and non–constant variability.  
12  
13  
14  
15

16 Pre–specified subgroups in the analyses studying potential associations between  
17 ventilator settings and outcome will be: (1) patients at low risk of ARDS vs. patients at  
18 risk of ARDS; (2) patients without ARDS vs. patients with ARDS; (3) reason for ICU  
19 admission; and (4) reason for start of invasive ventilation. Statistical analyses will be  
20 conducted using R ([www.r-project.org](http://www.r-project.org)). A  $P$ –value of less than 0.05 will be considered  
21 statistically significant.  
22  
23  
24  
25  
26  
27  
28  
29

### 30 *Study organization*

31 The Steering Committee is composed of a selection of PROVE Network investigators  
32 plus the national coordinators from each participating country. These investigators were  
33 involved in the design of PRoVENT–iMIC. National coordinators are responsible for  
34 identifying and recruiting local participating centres. They assist and train the local  
35 investigators and oversee the conduct of the study, including administrative  
36 management, record keeping and data management. Local investigators in individual  
37 participating centres will provide scientific and structural leadership, ensuring local  
38 ethical and regulatory approvals are obtained before start of patient inclusion. National  
39 Coordinators and Local Investigators are expected to guarantee the quality and security  
40 of the data collected.  
41  
42  
43  
44  
45  
46  
47  
48  
49  
50  
51  
52  
53  
54  
55  
56  
57  
58  
59  
60

1  
2  
3 Prior to start of the study, study teams in each centre will undergo a web-based  
4 training session on how to capture data in the electronic CRF. All study team members  
5 will be provided with a manual of operations with instructions on how to accurately fill the  
6 forms and the screening log. Incomplete or incorrectly entered electronic CRFs will be  
7 signalled to the local investigators by the national and international coordinator, for  
8 further review of the missing or flagged data.  
9  
10  
11  
12  
13  
14  
15  
16  
17  
18  
19  
20  
21  
22  
23  
24  
25  
26  
27  
28  
29  
30  
31  
32  
33  
34  
35  
36  
37  
38  
39  
40  
41  
42  
43  
44  
45  
46  
47  
48  
49  
50  
51  
52  
53  
54  
55  
56  
57  
58  
59  
60

## ETHICS AND DISSEMINATION

The Oxford Tropical Research Ethical Committee (OxTREC) at the University of Oxford, United Kingdom, exempted the study from ethical review on the 2<sup>nd</sup> of June 2017. Data management, monitoring and reporting of the study will be performed in accordance with the International Conference on Harmonization – Good Clinical Practice guidelines.

All participating centres will also submit the study protocol to the national or local Institutional Review Board for ethical judgment, as applicable by the current regulations in the country. Due to the strict observational design and anonymous collection of data, informed consent may not be required in most countries. However, where informed consent is required, this must be approved by the local ethical committee before the start of inclusion.

The study will be reported following the Strengthening the reporting of Observational Studies in Epidemiology (STROBE) statement guidelines and checklists[28]. The results of this study will be published in a peer-reviewed medical journal. After publication of the primary results, on request the pooled dataset will be available for all members of the PRoVENT-iMIC collaboration for secondary analysis, after judgment and approval of scientific quality and validity of the proposed analysis by the Steering Committee.

## DISCUSSION

PRoVENT–iMIC is designed to characterize the epidemiology, ventilator management, occurrence of pulmonary complications and outcomes in invasively ventilated patients in an estimated 60 ICUs in 11 Asian countries. The results of PRoVENT–iMIC will help to understand current ventilation practice in South and Southeast Asia, particularly with respect to variability in ventilator settings amongst patients without, at risk for or with established ARDS. Results of this study will be used to plan future trials of ventilation in ICU patients in these settings.

PRoVENT–iMIC has several strengths. First, we will have a sample size large enough to obtain precise estimates of pulmonary complications and ICU mortality and to examine potential associations between ventilation practice and patient outcomes. Second, the study sample is not restricted to certain patient diagnostic categories. Third, the attention on ventilation practice will provide robust data on this specific domain while the 7 days follow–up will allow precise recording of pulmonary complications at their origin. And finally, the wide representation of Asian countries will allow inferences on geo–economic differences in epidemiology, management and outcomes of mechanical ventilation across the entire subcontinent.

The focus on South and Southeast Asia follows our scarce knowledge about clinical practices and ventilation strategies used in critically ill patients in this and other resource–limited settings [20]. The burden of critical illness in low– and middle–income countries is higher than generally perceived and it is expected to increase with an aging population [29]. Additionally, ICUs are increasingly being set up in the region, especially in busy urban settings. A recent survey highlighted considerable variation in structure, organization and critical care delivery in Asian ICUs, but did not shed light on ventilation

1  
2  
3 management and patient-centred ventilation-associated outcomes [30]. This  
4  
5 information, however, is crucial for future trials of ventilation in ICU patients in these  
6  
7 settings, as we need to know whether critically ill patients across Asia equally benefit  
8  
9 from lung-protective ventilation as those in Western countries. Additionally, for proper  
10  
11 power calculations, information with regard to potential primary endpoints, like the  
12  
13 incidence of development of ARDS, duration of ventilation or death, is highly needed.  
14  
15 PRoVENT-iMIC will be the first observational study that can provide this information for  
16  
17 settings in South Asia. Results restricted to individual settings could also be valuable for  
18  
19 local clinicians seeking to improve their local practice, training planning and identify local  
20  
21 priorities for quality improvement within their departments.  
22  
23  
24  
25

26  
27 There is now strong evidence-based support for various ICU process-based  
28  
29 interventions such as lung protective ventilation[31], conservative fluid management  
30  
31 strategies[32] and weaning protocols[33]. While centre- or country-specific practices or  
32  
33 restrictions of resources are potential challenges that affect implementation of all these  
34  
35 interventions, we focus on the management of ventilation and especially on the  
36  
37 employment of lung-protective ventilation where feasibility may represent an issue  
38  
39 specific to resource-limited settings. Recent literature has underlined the potential role  
40  
41 of the driving pressure (the pressure amplitude during each artificial breath) and its  
42  
43 determinants in the development of ventilator-associated lung injury. Results from  
44  
45 PRoVENT-iMIC will provide further data to enable us to discriminate the effects of  $V_T$   
46  
47 size, PEEP and driving pressure on outcomes in patients with, at risk of, or without  
48  
49 ARDS.  
50  
51  
52

53  
54 PRoVENT-iMIC will provide important data regarding outcomes following  
55  
56 invasive ventilation, including a wide range of clinically important pulmonary  
57  
58  
59

1  
2  
3 complications. Historical studies from low–resource settings documented mortality rates  
4  
5 to exceed 70%[13–15]. However more recent data from South America and India have  
6  
7 documented mortality rates of ~40%, similar to that in high–income countries[16,17].  
8  
9 This suggests that mortality in ventilated patients has the potential to improve in low–  
10  
11 resource settings[11,12,34]. Although many factors may influence mortality, several  
12  
13 underappreciated factors related to invasive ventilation may have contributed, including  
14  
15 reduced need for invasive ventilation per se, improvements in safety of invasive  
16  
17 ventilation and in liberation from invasive ventilation.  
18  
19

20  
21 Our interest in patients at risk of ARDS follows a global recent shift in ARDS  
22  
23 research. It is now clear that ARDS is rarely present at the time of the initial healthcare  
24  
25 encounter, and typically develops during the hospital course, usually between days 2  
26  
27 and 5 in patients with predisposing conditions or risk factors[35]. Hence increasing  
28  
29 efforts are being directed toward early identification of patients at risk with a goal of  
30  
31 prevention and early treatment prior to the development of a fully established syndrome.  
32  
33 This is probably equally important in resource–limited settings where the predisposing  
34  
35 conditions and risk modifiers for ARDS may differ and limited escalation of therapy is  
36  
37 often the case. PRoVENT–iMIC will be the first study to evaluate prospectively the role  
38  
39 of LIPS in these settings. Although the poor predictive accuracy of the LIPS does not  
40  
41 currently support its use in everyday clinical practice [36], it has enabled enrolment in  
42  
43 clinical trials of ARDS prevention [22] and may yield an initial idea on the patients at risk  
44  
45 of and disease progression in the Asian settings under study.  
46  
47  
48  
49

50  
51 PRoVENT–iMIC has some noticeable shortcomings. The definition of ‘middle–  
52  
53 income’ country is rather artificial as the level of health expenditure, local resources and  
54  
55 other geo–cultural factors might affect the processes of care in a larger extent than  
56  
57  
58

1  
2  
3 national income classification. Despite the inclusion of ICUs from 11 countries, which  
4 improves study generalizability, caution is needed when applying the results to  
5 supposedly similar settings, as substantial intra- and trans-national variations in ICU  
6 resources, staffing and organization exist. Second, the case report form used in  
7 PROVENT-iMIC is not exhaustive and does not include data regarding extra-pulmonary  
8 complications, hospital-discharge outcomes or other ICU processes of care that may  
9 indirectly affect ventilation. Similarly, due to the time window restricted to the ICU stay,  
10 we will apply the LIPS at ICU admission and not in the first 6 hours after hospital  
11 admission, as originally designed. Mortality may be underestimated in some settings  
12 where due to local practices there is the possibility to be discharged home in case of  
13 terminal conditions or family decision. To address this we made sure the data collection  
14 form captures this event whenever it represents the reason of discharge. Third, due to  
15 the limitation of laboratory data we will have a limited dataset that will not comprise daily  
16 severity scores useful for statistical controlling purposes. Also, the conceivable limitation  
17 in blood gas analysis and radiology exams may limit the documentation of insurgence or  
18 worsening of ARDS and other pulmonary complications. Finally, participation in  
19 international studies like PROVENT-iMIC always bears the risk of biased to those  
20 centres that do not fully or reliably represent ICU-care in general in the participating  
21 countries.  
22  
23  
24  
25  
26  
27  
28  
29  
30  
31  
32  
33  
34  
35  
36  
37  
38  
39  
40  
41  
42  
43  
44  
45  
46  
47  
48  
49  
50  
51  
52  
53  
54  
55  
56  
57  
58  
59  
60



## CONCLUSIONS

PRoVENT-iMIC is designed to understand the epidemiology, practice of ventilation, and outcomes of critically-ill patients receiving invasive ventilation in a large set of South Asian countries. Results of this study could help identify practices that may best explain differences in outcomes, and could be used in designing new trials of ventilation in these settings.

For peer review only

## Author affiliations

## Contributors

LP, AGA, ASN, AMD and MJS were equally responsible for writing of the manuscript and participated in study design. FP, PP participated in study design and assisted in writing of the manuscript. AA, AB, KC, AF, RaH, ReH, MH, HAI, KI, SI, GK, BK, HM, BN, RP, SS, LT, SG, NNT, NMY, MGdA reviewed the manuscript and agreed with submission.

## Funding

This research received no specific grant from any funding agency in the public, commercial or not-for profit sectors.

## Competing interests

None

## Ethics approval

The Oxford Tropical Research Ethical Committee (OxTREC) at the University of Oxford, United Kingdom, exempted the study from ethical review on the 2<sup>nd</sup> of June 2017. IRB approval was obtained from Sri Lanka, Bangladesh and Malaysia and is underway in Myanmar, Iran, India, Vietnam, Thailand, Nepal, Pakistan and Maldives.

**REFERENCES**

- 1 Slutsky AS, Ranieri VM. Ventilator-induced lung injury. *N Engl J Med* 2014;**370**:980. doi:10.1056/NEJMc1400293
- 2 Serpa N, Schultz M, Slutsky A. Current concepts of protective ventilation during general anaesthesia. *Swiss Med Wkly* 2015;**145**:w14211. doi:10.4414/smw.2015.14211
- 3 Putensen C, Theuerkauf N, Zinserling J, *et al.* Meta-analysis: ventilation strategies and outcomes of the acute respiratory distress syndrome and acute lung injury. *Ann Intern Med* 2009;**151**:566–76.
- 4 Serpa Neto A, Cardoso SO, Manetta JA, *et al.* Association Between Use of Lung-Protective Ventilation With Lower Tidal Volumes and Clinical Outcomes Among Patients Without Acute Respiratory Distress Syndrome. *JAMA* 2012;**308**:1651. doi:10.1001/jama.2012.13730
- 5 Güldner A, Kiss T, Serpa Neto A, *et al.* Intraoperative Protective Mechanical Ventilation for Prevention of Postoperative Pulmonary Complications. *Anesthesiology* 2015;**123**:692–713. doi:10.1097/ALN.0000000000000754
- 6 Briel M, Meade M, Mercat A, *et al.* Higher vs lower positive end-expiratory pressure in patients with acute lung injury and acute respiratory distress syndrome: systematic review and meta-analysis. *JAMA* 2010;**303**:865–73. doi:10.1001/jama.2010.218
- 7 Ferguson ND. Low Tidal Volumes for All? *JAMA* 2012;**308**:1689. doi:10.1001/jama.2012.14509
- 8 Serpa Neto A, Nagtzaam L, Schultz MJ. Ventilation with lower tidal volumes for critically ill patients without the acute respiratory distress syndrome: a systematic

- 1  
2  
3 translational review and meta-analysis. *Curr Opin Crit Care* 2014;**20**:25–32.  
4  
5 doi:10.1097/MCC.000000000000044  
6  
7  
8 9 Dellinger RP, Levy MM, Rhodes A, *et al*. Surviving sepsis campaign: International  
9  
10 guidelines for management of severe sepsis and septic shock, 2012. *Intensive*  
11  
12 *Care Med* 2013;**39**:165–228. doi:10.1007/s00134-012-2769-8  
13  
14  
15 10 Bellani G, Gattinoni L, Haren F Van, *et al*. Epidemiology, Patterns of Care, and  
16  
17 Mortality for Patients With Acute Respiratory Distress Syndrome in Intensive Care  
18  
19 Units in 50 Countries. *JAMA* 2016;**315**:2526–33.  
20  
21  
22 11 Neto AS, Barbas CS V, Simonis FD, *et al*. Epidemiological characteristics, practice  
23  
24 of ventilation, and clinical outcome in patients at risk of acute respiratory distress  
25  
26 syndrome in intensive care units from 16 countries (PRoVENT): an international,  
27  
28 multicentre, prospective study. 2016;**4**:882–93. doi:10.1016/S2213-  
29  
30 2600(16)30305-8  
31  
32  
33 12 Epidemiology, practice of ventilation and outcome for patients at increased risk of  
34  
35 postoperative pulmonary complications. *Eur J Anaesthesiol* 2017;**34**:492–507.  
36  
37 doi:10.1097/EJA.0000000000000646  
38  
39  
40 13 Sinclair JR, Watters DA, Davison M. Outcome of mechanical ventilation in Central  
41  
42 Africa. *Ann R Coll Surg Engl* 1988;**70**:76–9.  
43  
44  
45 14 Rajapakse VP, Wijesekera S. Outcome of mechanical ventilation in Sri Lanka. *Ann*  
46  
47 *R Coll Surg Engl* 1989;**71**:344–6.  
48  
49  
50 15 Sudarsanam TD, Jeyaseelan L, Thomas K, *et al*. Predictors of mortality in  
51  
52 mechanically ventilated patients. *Postgrad Med J* 2005;**81**:780–3.  
53  
54 doi:10.1136/pgmj.2005.033076  
55  
56  
57 16 Azevedo LC, Park M, Salluh JI, *et al*. Clinical outcomes of patients requiring  
58  
59  
60

- 1  
2  
3 ventilatory support in Brazilian intensive care units: a multicenter, prospective,  
4 cohort study. *Crit Care* 2013;**17**:R63. doi:10.1186/cc12594  
5  
6  
7  
8 17 Karthikeyan B, Kadiravan T, Deepanjali S, *et al*. Case-Mix, Care Processes, and  
9 Outcomes in Medically-Ill Patients Receiving Mechanical Ventilation in a Low-  
10 Resource Setting from Southern India: A Prospective Clinical Case Series. *PLoS*  
11 *One* 2015;**10**:e0135336. doi:10.1371/journal.pone.0135336  
12  
13  
14  
15  
16  
17 18 Serpa Neto A, Schultz MJ, Festic E. Ventilatory support of patients with sepsis or  
18 septic shock in resource-limited settings. *Intensive Care Med* 2016;**42**:100–3.  
19 doi:10.1007/s00134-015-4070-0  
20  
21  
22  
23  
24 19 Haniffa R, Lubell Y, Cooper BS, *et al*. Impact of a structured ICU training  
25 programme in resource-limited settings in Asia. *PLoS One* 2017;**12**:e0173483.  
26 doi:10.1371/journal.pone.0173483  
27  
28  
29  
30  
31 20 Dünser MW, Baelani I, Ganbold L, *et al*. A review and analysis of intensive care  
32 medicine in the least developed countries\*. *Crit Care Med* 2006;**34**:1234–42.  
33 doi:10.1097/01.CCM.0000208360.70835.87  
34  
35  
36  
37  
38 21 The World Bank. World Bank Country Classification.  
39 [https://datahelpdesk.worldbank.org/knowledgebase/topics/19280-country-](https://datahelpdesk.worldbank.org/knowledgebase/topics/19280-country-classification)  
40 [classification](https://datahelpdesk.worldbank.org/knowledgebase/topics/19280-country-classification) (accessed 1 May 2017).  
41  
42  
43  
44  
45 22 Gajic O, Dabbagh O, Park PK, *et al*. Early identification of patients at risk of acute  
46 lung injury: evaluation of lung injury prediction score in a multicenter cohort study.  
47 *Am J Respir Crit Care Med* 2011;**183**:462–70. doi:10.1164/rccm.201004-0549OC  
48  
49  
50  
51  
52 23 The ARDS Definition Task Force\*, Ranieri VM, Rubenfeld GD, *et al*. Acute  
53 respiratory distress syndrome: the Berlin Definition. *JAMA J Am Med Assoc*  
54 2012;**307**:1. doi:10.1001/jama.2012.5669  
55  
56  
57  
58  
59  
60

- 1  
2  
3 24 Ashizawa K, Hayashi K, Aso N, *et al.* Lobar atelectasis: diagnostic pitfalls on chest  
4 radiography. *Br J Radiol* 2001;**74**:89–97. doi:10.1259/bjr.74.877.740089  
5  
6  
7 25 Riviello ED, Kiviri W, Twagirumugabe T, *et al.* Hospital Incidence and Outcomes of  
8 the Acute Respiratory Distress Syndrome Using the Kigali Modification of the  
9 Berlin Definition. *Am J Respir Crit Care Med* 2016;**193**:52–9.  
10  
11  
12  
13  
14  
15  
16  
17 26 Rice TW, Wheeler AP, Bernard GR, *et al.* Comparison of the SpO<sub>2</sub>/FIO<sub>2</sub> ratio  
18 and the PaO<sub>2</sub>/FIO<sub>2</sub> ratio in patients with acute lung injury or ARDS. *Chest*  
19  
20  
21  
22  
23  
24 27 Harris PA, Taylor R, Thielke R, *et al.* Research electronic data capture (REDCap)-  
25  
26  
27  
28  
29  
30  
31  
32  
33 28 von Elm E, Altman DG, Egger M, *et al.* The Strengthening the Reporting of  
34  
35  
36  
37  
38  
39  
40  
41  
42 29 Adhikari NKJ, Fowler RA, Bhagwanjee S, *et al.* Critical care and the global burden  
43  
44  
45  
46  
47  
48  
49 30 Arabi YM, Phua J, Koh Y, *et al.* Structure, Organization, and Delivery of Critical  
50  
51  
52  
53  
54  
55  
56 31 Acute Respiratory Distress Syndrome Network, Brower RG, Matthay MA, *et al.*  
57  
58  
59  
60

- 1  
2  
3 Ventilation with Lower Tidal Volumes as Compared with Traditional Tidal Volumes  
4 for Acute Lung Injury and the Acute Respiratory Distress Syndrome. *N Engl J Med*  
5 2000;**342**:1301–8. doi:10.1056/NEJM200005043421801  
6  
7  
8  
9  
10 32 National Heart, Lung, and Blood Institute Acute Respiratory Distress Syndrome  
11 (ARDS) Clinical Trials Network, Wiedemann HP, Wheeler AP, *et al.* Comparison  
12 of two fluid-management strategies in acute lung injury. *N Engl J Med*  
13 of two fluid-management strategies in acute lung injury. *N Engl J Med*  
14 2006;**354**:2564–75. doi:10.1056/NEJMoa062200  
15  
16  
17  
18  
19 33 Girard TD, Kress JP, Fuchs BD, *et al.* Efficacy and safety of a paired sedation and  
20 ventilator weaning protocol for mechanically ventilated patients in intensive care  
21 (Awakening and Breathing Controlled trial): a randomised controlled trial. *Lancet*  
22 (London, England) 2008;**371**:126–34. doi:10.1016/S0140-6736(08)60105-1  
23  
24  
25  
26  
27  
28 34 Esteban A, Frutos-Vivar F, Muriel A, *et al.* Evolution of Mortality over Time in  
29 Patients Receiving Mechanical Ventilation. *Am J Respir Crit Care Med*  
30 2013;**188**:220–30. doi:10.1164/rccm.201212-2169OC  
31  
32  
33  
34  
35 35 Gajic O, Dabbagh O, Park PK, *et al.* Early Identification of Patients at Risk of  
36 Acute Lung Injury: Evaluation of Lung Injury Prediction Score in a Multicenter  
37 Cohort Study. *Am J Respir Crit Care Med* 2010;:1–33. doi:10.1164/rccm.201004-  
38 0549OC  
39  
40  
41  
42  
43  
44 36 Festic E, Kor DJ, Gajic O. Prevention of acute respiratory distress syndrome. *Curr*  
45 *Opin Crit Care* 2015;**21**:82–90. doi:10.1097/MCC.000000000000174  
46  
47  
48  
49  
50  
51  
52  
53  
54  
55  
56  
57  
58  
59  
60

## FIGURE LEGENDS

### **Figure 1:** Flowchart of inclusion of PRoVENT-iMIC

Abbreviations: MV, Mechanical Ventilation; LIPS, Lung Injury Prediction Score; ARDS, Acute Respiratory Distress Syndrome.

### **Figure 2.** Sequence of data submission in the electronic case report form

Abbreviations: LIPS, Lung Injury Prediction Score; MV, mechanical ventilation, ARDS, Acute Respiratory Distress Syndrome; CPE, cardiogenic pulmonary oedema; ICU, Intensive Care Unit.



1  
2  
3  
4  
5  
6  
7  
8  
9  
10  
11  
12  
13  
14  
15  
16  
17  
18  
19  
20  
21  
22  
23  
24  
25  
26  
27  
28  
29  
30  
31  
32  
33  
34  
35  
36  
37  
38  
39  
40  
41  
42  
43  
44  
45  
46  
47  
48  
49  
50  
51  
52  
53  
54  
55  
56  
57  
58  
59  
60

**Figure 1**

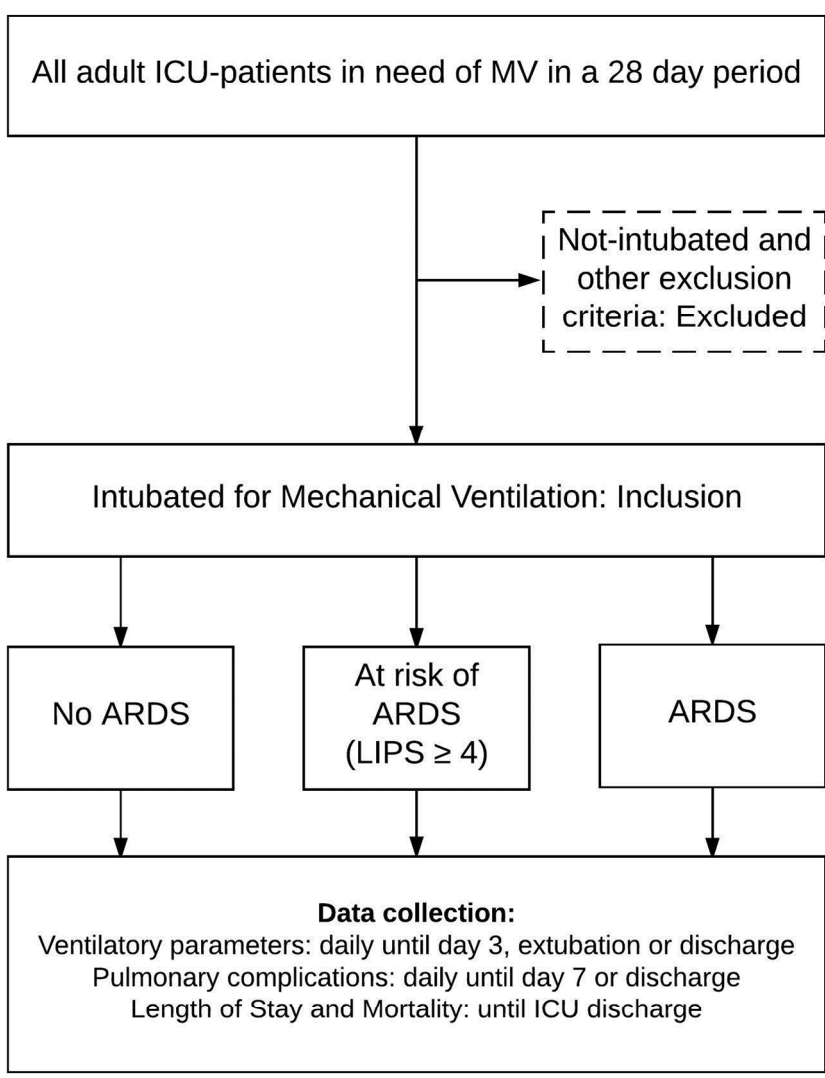

**Figure 2**

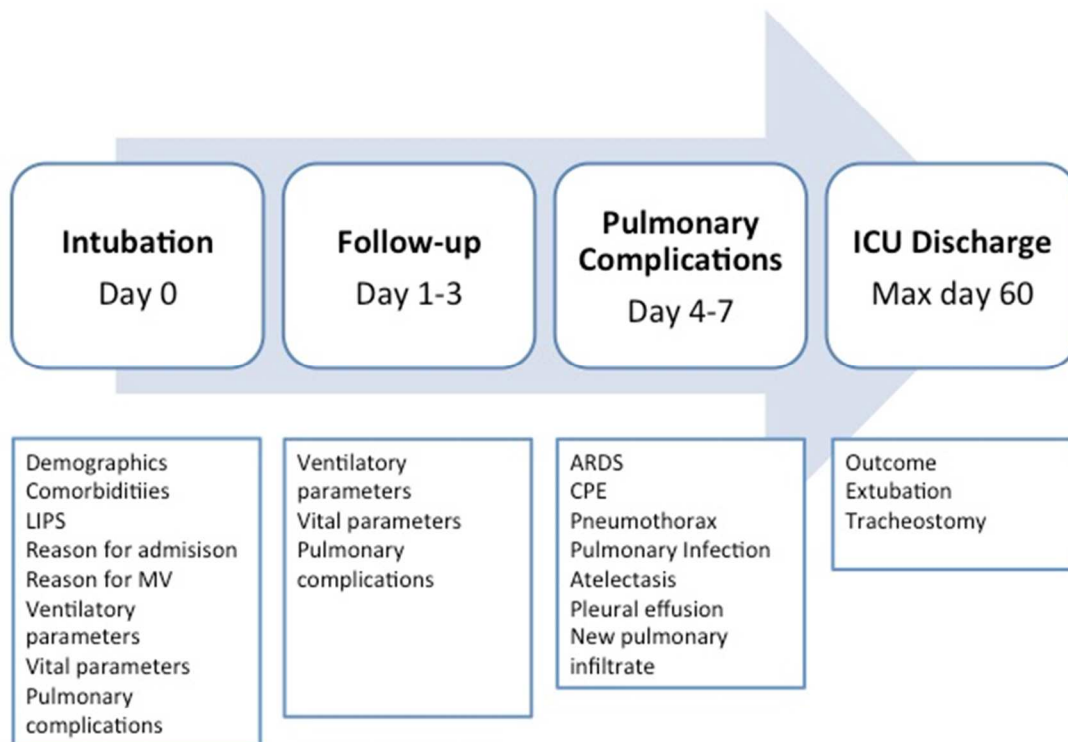

view only

**Table 1a. The Berlin definition of ARDS**

| Criteria                   | Definition                                                                                                                                                                               |                                            |                                      |
|----------------------------|------------------------------------------------------------------------------------------------------------------------------------------------------------------------------------------|--------------------------------------------|--------------------------------------|
| Time                       | Within one week of a known clinical insult, or new/worsening respiratory symptoms                                                                                                        |                                            |                                      |
| Chest imaging <sup>1</sup> | Bilateral opacities not fully explained by effusions, lobar/lung collapse or nodules                                                                                                     |                                            |                                      |
| Origin of oedema           | Respiratory failure not fully explained by cardiac failure or fluid overload; need objective assessment to exclude hydrostatic oedema if no risk factor present (e.g., echocardiography) |                                            |                                      |
| Oxygenation <sup>2</sup>   | Mild                                                                                                                                                                                     | Moderate                                   | Severe                               |
|                            | $200 < \text{PaO}_2/\text{FiO}_2 \leq 300$                                                                                                                                               | $100 < \text{PaO}_2/\text{FiO}_2 \leq 200$ | $\text{PaO}_2/\text{FiO}_2 \leq 100$ |
|                            | PEEP or CPAP <sup>3</sup> $\geq 5$ cm H <sub>2</sub> O                                                                                                                                   | PEEP $\geq 5$ cm H <sub>2</sub> O          | PEEP $\geq 5$ cm H <sub>2</sub> O    |

Abbreviations: ARDS, acute respiratory distress syndrome; PaO<sub>2</sub>, partial pressure of arterial oxygen; FiO<sub>2</sub>, fraction of inspired oxygen; PEEP, positive end-expiratory pressure; CPAP, continuous positive airway pressure.

<sup>1</sup>chest X-ray or CT scan; <sup>2</sup>if altitude higher than 1,000 meters, correction factor should be made as follows:  $\text{PaO}_2/\text{FiO}_2 \times (\text{barometric pressure}/760)$ ; <sup>3</sup>this may be delivered noninvasively in the mild acute respiratory distress syndrome

**Table 1b. Alternative Oxygenation criteria (if PaO<sub>2</sub> data unavailable)**

| Criteria           | Mild ARDS                                  | Moderate ARDS                              | Severe ARDS                          |
|--------------------|--------------------------------------------|--------------------------------------------|--------------------------------------|
| <b>Oxygenation</b> | $235 < \text{SpO}_2/\text{FiO}_2 \leq 315$ | $150 < \text{SpO}_2/\text{FiO}_2 \leq 235$ | $\text{SpO}_2/\text{FiO}_2 \leq 150$ |
|                    | PEEP or CPAP $\geq 5$ cmH <sub>2</sub> O   | PEEP $\geq 5$ cmH <sub>2</sub> O           | PEEP $\geq 5$ cmH <sub>2</sub> O     |

Abbreviations: SpO<sub>2</sub>, pulse oximetry oxygen saturation; FiO<sub>2</sub>, fraction of inspired oxygen

**Table 2.** Lung Injury Prediction Score (LIPS) calculation worksheet<sup>17,34</sup>

| <b>Predisposing Conditions</b> | <b>Score</b> | <b>Risk Modifiers</b>               | <b>Score</b> |
|--------------------------------|--------------|-------------------------------------|--------------|
| Shock                          | 2            | Alcohol Abuse                       | 1            |
| Aspiration                     | 2            | BMI > 30 kg/m <sup>2</sup>          | 1            |
| Sepsis                         | 1            | Hypoalbuminemia                     | 1            |
| Pneumonia                      | 1.5          | Chemotherapy                        | 1            |
| <b>High-Risk Surgery</b>       |              | FiO <sub>2</sub> > 0.35 (> 4 l/min) | 2            |
| Orthopedic Spine               | 1            | RR > 30 bpm                         | 1.5          |
| Acute Abdomen                  | 2            | SpO <sub>2</sub> < 95%              | 1            |
| Cardiac                        | 2.5          | Acidosis (pH < 7.35)                | 1.5          |
| Aortic Vascular                | 3.5          | Diabetes Mellitus*                  | - 1          |
| Emergency surgery              | 1.5          |                                     |              |
| <b>High-Risk Trauma</b>        |              |                                     |              |
| Traumatic Brain Injury         | 2            |                                     |              |
| Smoke Inhalation               | 2            |                                     |              |
| Near-Drowning                  | 2            |                                     |              |
| Lung Contusion                 | 1.5          |                                     |              |
| Multiple Fractures             | 1.5          |                                     |              |

Abbreviations: BMI, body mass index; FiO<sub>2</sub>, fraction of inspired oxygen; RR, respiratory Rate; SpO<sub>2</sub>, pulse oximetry oxygen saturation.

\*(to consider only in septic patients)

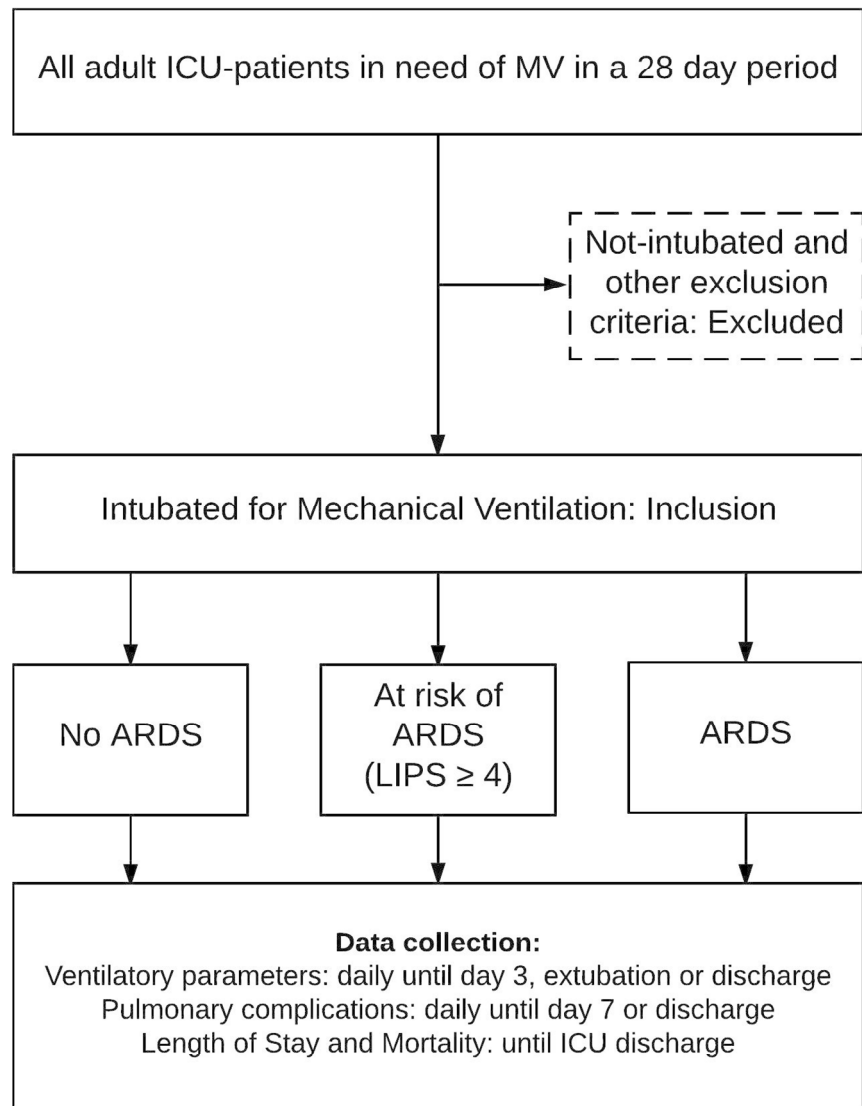

Figure 1: Flowchart of inclusion of PROVENT-iMIC<sup>!!</sup> + . Abbreviations: MV, Mechanical Ventilation; LIPS, Lung Injury Prediction Score; ARDS, Acute Respiratory Distress Syndrome.<sup>!!</sup> +

120x152mm (300 x 300 DPI)

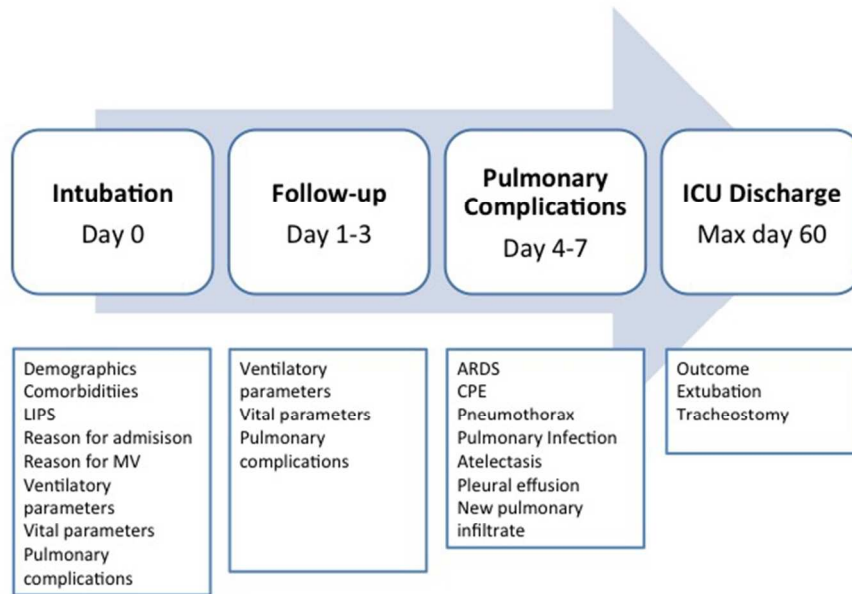

Figure 2: Sequence of data submission in the electronic case report form!! † . Abbreviations: LIPS, Lung Injury Prediction Score; MV, mechanical ventilation, ARDS, Acute Respiratory Distress Syndrome; CPE, cardiogenic pulmonary oedema; ICU, Intensive Care Unit. !! †

254x190mm (72 x 72 DPI)

view only

# BMJ Open

## PRactice of VENTilation in Middle–Income Countries (PRoVENT–iMIC) – rationale and protocol for a prospective international multicentre observational study in intensive care units in Asia

|                               |                                                                                                                                                                                                                                                                                                                                                                                                                                                                                                                                                                                                                                                                                                                                                                                                                                                                                                                                                                                                                                                                                                                                                                                                                                                                                                                                                                                                                                                                                                                                                                                                                                                                                                                                                                                                                                                                                                                                                                                                                                                                                                                                                                                                                                               |
|-------------------------------|-----------------------------------------------------------------------------------------------------------------------------------------------------------------------------------------------------------------------------------------------------------------------------------------------------------------------------------------------------------------------------------------------------------------------------------------------------------------------------------------------------------------------------------------------------------------------------------------------------------------------------------------------------------------------------------------------------------------------------------------------------------------------------------------------------------------------------------------------------------------------------------------------------------------------------------------------------------------------------------------------------------------------------------------------------------------------------------------------------------------------------------------------------------------------------------------------------------------------------------------------------------------------------------------------------------------------------------------------------------------------------------------------------------------------------------------------------------------------------------------------------------------------------------------------------------------------------------------------------------------------------------------------------------------------------------------------------------------------------------------------------------------------------------------------------------------------------------------------------------------------------------------------------------------------------------------------------------------------------------------------------------------------------------------------------------------------------------------------------------------------------------------------------------------------------------------------------------------------------------------------|
| Journal:                      | <i>BMJ Open</i>                                                                                                                                                                                                                                                                                                                                                                                                                                                                                                                                                                                                                                                                                                                                                                                                                                                                                                                                                                                                                                                                                                                                                                                                                                                                                                                                                                                                                                                                                                                                                                                                                                                                                                                                                                                                                                                                                                                                                                                                                                                                                                                                                                                                                               |
| Manuscript ID                 | bmjopen-2017-020841.R1                                                                                                                                                                                                                                                                                                                                                                                                                                                                                                                                                                                                                                                                                                                                                                                                                                                                                                                                                                                                                                                                                                                                                                                                                                                                                                                                                                                                                                                                                                                                                                                                                                                                                                                                                                                                                                                                                                                                                                                                                                                                                                                                                                                                                        |
| Article Type:                 | Protocol                                                                                                                                                                                                                                                                                                                                                                                                                                                                                                                                                                                                                                                                                                                                                                                                                                                                                                                                                                                                                                                                                                                                                                                                                                                                                                                                                                                                                                                                                                                                                                                                                                                                                                                                                                                                                                                                                                                                                                                                                                                                                                                                                                                                                                      |
| Date Submitted by the Author: | 30-Jan-2018                                                                                                                                                                                                                                                                                                                                                                                                                                                                                                                                                                                                                                                                                                                                                                                                                                                                                                                                                                                                                                                                                                                                                                                                                                                                                                                                                                                                                                                                                                                                                                                                                                                                                                                                                                                                                                                                                                                                                                                                                                                                                                                                                                                                                                   |
| Complete List of Authors:     | <p>Pisani, Luigi; Mahidol Oxford Tropical Medicine Research Unit; AMC, Department of Intensive Care<br/>         Algera, Anna; AMC, Department of Intensive Care<br/>         Serpa Neto, Ary; Hospital Israelita Albert Einstein, Department of Intensive Care Medicine<br/>         Ahsan, Areef ; Bangladesh Institute of Research and Rehabilitation in Diabetes Endocrines and Metabolic Disorders, Department of Critical Care<br/>         Beane, Abi; Network for Improving Critical Care Systems and Training; Mahidol Oxford Tropical Medicine Research Unit<br/>         Chittawatnarat, Kaweesak ; Chiang Mai University, Department of Surgery<br/>         Faiz, Abul; Mahidol Oxford Tropical Medicine Research Unit; Dev Care Foundation<br/>         Haniffa, Rshan; National Intensive Care Surveillance, NICS<br/>         Hashemian, Reza; Shaheed Beheshti University of Medical Sciences, National Research Institute of Tuberculosis and Lung Diseases<br/>         Hashmi, Madiha; Aga Khan University, Department of Anaesthesiology<br/>         Imad, Hisham; Mahidol University Faculty of Tropical Medicine, Department of Clinical Tropical Medicine<br/>         Indraratna, Kanishka; Sri Jayewardenepura General Hospital, Department of Intensive Care<br/>         Iyer, Shivakumar ; Bharati Vidyapeeth University Medical College and Hospital, Department of Medicine<br/>         Kayastha, Gyan; Patan Academy of Health Sciences, Department of Internal Medicine<br/>         Krishna, Bhuvana ; St John's Medical College, Department of Critical Care Medicine<br/>         Moosa, Hassan; Indira Gandhi Memorial Hospital, Department of Intensive Care<br/>         Nadjm, Behzad; National Hospital for Tropical Diseases, Oxford University Clinical Research Unit<br/>         Pattnaik, Rajyabardhan; Ispat General Hospital, Critical Care Unit<br/>         Sampath, Sriram; St John's Medical College, Department of Critical Care Medicine<br/>         Thwaites, Louise; Oxford University Clinical Research Unit, Hospital for Tropical Diseases<br/>         Tun, Ni Ni; Medical Action Myanmar<br/>         Yunos, Nor'Azim; Monash University - Malaysia Campus, Jeffrey Cheah</p> |

|                                  |                                                                                                                                                                                                                                                                                                                                                                                                                                                                                                                                                                                                                                                                                                                                                                                    |
|----------------------------------|------------------------------------------------------------------------------------------------------------------------------------------------------------------------------------------------------------------------------------------------------------------------------------------------------------------------------------------------------------------------------------------------------------------------------------------------------------------------------------------------------------------------------------------------------------------------------------------------------------------------------------------------------------------------------------------------------------------------------------------------------------------------------------|
|                                  | School of Medicine and Health Sciences<br>Grasso, Salvatore; Università degli Studi di Bari Dipartimento Emergenza e Trapianti di Organi, Intensive Care Unit<br>Paulus, Frederique; AMC, Department of Intensive Care<br>De Abreu, Marcelo Gama; University Hospital Carl Gustav Carus, and Technische Universität Dresden, 18 Pulmonary Engineering Group, Department of Anesthesiology and Intensive Care Medicine<br>Pelosi, Paolo; IRCCS Azienda Ospedaliera Universitaria San Martino - IST Istituto Nazionale per la Ricerca sul Cancro, Department of Surgical Sciences and Integrated Diagnostics<br>Dondorp, Arjen; Mahidol Oxford Tropical Medicine Research Unit<br>Schultz, Marcus; AMC, Department of Intensive Care; Mahidol Oxford Tropical Medicine Research Unit |
| <b>Primary Subject Heading</b> : | Intensive care                                                                                                                                                                                                                                                                                                                                                                                                                                                                                                                                                                                                                                                                                                                                                                     |
| Secondary Subject Heading:       | Epidemiology, Global health, Respiratory medicine                                                                                                                                                                                                                                                                                                                                                                                                                                                                                                                                                                                                                                                                                                                                  |
| Keywords:                        | mechanical ventilation, invasive ventilation, ARDS, outcomes, middle-income countries, resource-limited settings                                                                                                                                                                                                                                                                                                                                                                                                                                                                                                                                                                                                                                                                   |
|                                  |                                                                                                                                                                                                                                                                                                                                                                                                                                                                                                                                                                                                                                                                                                                                                                                    |

SCHOLARONE™  
Manuscripts

Review only



# PRactice of VENTilation in Middle–Income Countries (PRoVENT–iMIC) – rationale and protocol for a prospective international multicentre observational study in Intensive Care Units in Asia

Luigi Pisani,<sup>1,21</sup> Anna Geke Algera,<sup>1</sup> Ary Serpa Neto,<sup>1,3</sup> Areef Ahsan,<sup>4</sup> Abigail Beane,<sup>21</sup> Kaweesak Chittawatanarat,<sup>5</sup> Abul Faiz,<sup>6,21</sup> Rashan Haniffa,<sup>21</sup> Reza Hashemian,<sup>7</sup> Madiha Hashmi,<sup>8</sup> Hisham Ahmed Imad,<sup>9</sup> Kanishka Indraratna,<sup>10</sup> Shivakumar Iyer,<sup>11</sup> Gyan Kayastha,<sup>12</sup> Bhuvana Krishna,<sup>13</sup> Hassan Moosa,<sup>14</sup> Behzad Nadjm,<sup>20</sup> Rajyabardhan Pattnaik,<sup>15</sup> Sriram Sampath,<sup>13</sup> Louise Thwaites,<sup>16</sup> Ni Ni Tun,<sup>17</sup> Nor'azim Mohd Yunos,<sup>18</sup> Salvatore Grasso,<sup>19</sup> Frederique Paulus,<sup>1</sup> Marcelo Gama de Abreu,<sup>18</sup> Paolo Pelosi,<sup>19</sup> Arjen M. Dondorp,<sup>1,21</sup> and Marcus J. Schultz,<sup>1,2,21</sup>  
for the PRoVENT–iMIC investigators, MORU\* and the PROVE network\*\*

## **Academic Medical Center, Amsterdam, The Netherlands:**

<sup>1</sup>Department of Intensive Care

<sup>2</sup>Laboratory of Experimental Intensive Care and Anesthesiology (L·E·I·C·A)

## **Hospital Israelita Albert Einstein, São Paulo, Brazil:**

<sup>3</sup>Department of Intensive Care Medicine

## **BIRDEM General Hospital, Dhaka, Bangladesh:**

<sup>4</sup>Department of Critical Care

## **Chiang Mai University, Chiang Mai, Thailand:**

<sup>5</sup>Department of Surgery

## **Dev Care Foundation, Bangladesh**

## **Shahid Beheshti University of Medical Sciences, Tehran, Iran:**

<sup>7</sup>National Research Institute of Tuberculosis and Lung Diseases

## **Aga Khan University, Karachi, Pakistan:**

<sup>8</sup>Department of Anesthesiology

## **Faculty of Tropical Medicine, Mahidol University, Bangkok, Thailand:**

<sup>9</sup>Department of Clinical Tropical Medicine

## **Indira Gandhi Memorial Hospital, Malé, Maldives:**

<sup>14</sup> Department of Intensive Care

1  
2  
3 **Sri Jayewardenepura General Hospital, Nugegoda, Sri Lanka:**

4 <sup>10</sup>Department of Anesthesia and Intensive Care

5 **Bharati Vidyapeeth Medical College, Pune, India:**

6 <sup>11</sup>Department of Medicine

7 **Patan Academy of Health Science, Kathmandu, Nepal:**

8 <sup>12</sup>Department of Internal Medicine

9 **St. John's Medical College, Bangalore, India:**

10 <sup>13</sup>Department of Critical Care Medicine

11 **Ispat General Hospital, Rourkela, India:**

12 <sup>15</sup>Critical Care Unit

13 **Oxford University Clinical Research Unit, Ho Chi Minh City, Vietnam**

14 <sup>16</sup>Hospital for Tropical Diseases

15 **Medical Action Myanmar, Naypyidaw Myanmar:**

16 **Monash University Malaysia, Johor, Malaysia:**

17 <sup>18</sup>Jeffrey Cheah School of Medicine and Health Sciences

18 **University of Bari, Bari, Italy:**

19 <sup>19</sup>Department of Emergency and Organ Transplantation (DETO)

20 **University Hospital Carl Gustav Carus, and Technische Universität Dresden,**

21 **Dresden, Germany:**

22 <sup>18</sup>Pulmonary Engineering Group, Department of Anesthesiology and Intensive Care  
Medicine

23 **San Martino Policlinico Hospital - IRCCS for Oncology, University of Genoa,**

24 **Genoa, Italy:**

25 <sup>19</sup>Department of Surgical Sciences and Integrated Diagnostics

26 **National Hospital for Tropical Diseases, Hanoi, Vietnam**

27 <sup>20</sup>Oxford University Clinical Research Unit

28 **Faculty of Tropical Medicine, Mahidol University, Bangkok, Thailand:**

29 <sup>21</sup>Mahidol–Oxford Tropical Medicine Research Unit (MORU)

30 \*MORU, the Mahidol Oxford Tropical Medicine Research Unit, Bangkok, Thailand

31 ([www.tropmedres.ac](http://www.tropmedres.ac))

32 \*\*PROVE Network, the Protective Ventilation Network ([www.provenet.eu](http://www.provenet.eu))

33 Word count manuscript: 3974 words (abstract: 300 words)

34 Number of inserts: 2 tables and 2 figures

35 **Correspondence:**

36 Luigi Pisani, study coordinator

37 Mahidol–Oxford Tropical Medicine Research Unit (MORU)

38 Faculty of Tropical Medicine, Mahidol University

39 3rd Floor, 60th Anniversary Chulalongkornrajavidyalaya Building

40 420/6 Rajvithi Road, Bangkok 10400, Thailand

41 E-mail: [luigipisani@gmail.com](mailto:luigipisani@gmail.com)

1  
2  
3 **77 ABSTRACT**

4  
5 **78 *Introduction***

6  
7  
8 **79** Current evidence on epidemiology and outcomes of invasively mechanically ventilated  
9  
10 **80** intensive care unit (ICU) patients is predominantly gathered in resource-rich settings.  
11  
12 **81** Patient case-mixes and patterns of critical illnesses, and probably also ventilation  
13  
14 **82** practices are likely to be different in resource-limited settings. We aim to investigate the  
15  
16 **83** epidemiological characteristics, ventilation practices and clinical outcomes of patients  
17  
18 **84** receiving mechanical ventilation in ICUs in Asia.

19  
20  
21 **85 *Methods and analysis***

22  
23  
24 **86** PRoVENT-iMIC (study of PRactice of VENTilation in Middle Income Countries) is an  
25  
26 **87** international multicentre observational study to be undertaken in approximately 60 ICUs  
27  
28 **88** in 11 Asian countries. Consecutive patients aged 18 years or older who are receiving  
29  
30 **89** invasive ventilation in participating ICUs during a predefined 28-day period are to be  
31  
32 **90** enrolled, with a daily follow-up of 7 days. The primary outcome is ventilatory  
33  
34 **91** management (including tidal volume [ $V_T$ ] expressed as mL/kg predicted bodyweight  
35  
36 **92** [PBW], and positive end-expiratory pressure [PEEP] expressed as cm H<sub>2</sub>O) during the  
37  
38 **93** first three days of mechanical ventilation – compared between patients at no risk for  
39  
40 **94** ARDS, patients at risk for ARDS and in patients with ARDS (in case the diagnosis of  
41  
42 **95** ARDS can be made on admission). Secondary outcomes include occurrence of  
43  
44 **96** pulmonary complications and all-cause ICU mortality. The PRoVENT-iMIC study is  
45  
46 **97** registered at ClinicalTrials.gov, NCT 03188770.

47  
48  
49  
50  
51 **98 *Ethics and dissemination***

52  
53  
54 **99** PRoVENT-iMIC will be the first international study that prospectively assesses  
55  
56 **100** ventilation practices, outcomes and epidemiology of invasively ventilated patients in

1  
2  
3 101 ICUs in Asia. The results of this large study, to be disseminated through conference  
4  
5 102 presentations and publications in international peer-reviewed journals, are of ultimate  
6  
7 103 importance when designing trials of invasive ventilation in resource-limited ICUs.  
8  
9  
10 104 Access to source data will be made available through national or international  
11  
12 105 anonymized datasets upon request and after agreement of the PRoVENT-iMIC steering  
13  
14 106 committee.

15  
16  
17 107 **KEYWORDS:** mechanical ventilation; invasive ventilation; ARDS; outcomes; middle-  
18  
19 108 income countries; resource-limited settings.

20  
21 109 **TRIAL REGISTRATION:** PRoVENT-iMIC is registered at [www.clinicaltrials.gov](http://www.clinicaltrials.gov) with trial  
22  
23 110 identification number NCT 03188770.

24  
25  
26 111

#### 27 28 112 **STRENGTHS AND LIMITATIONS OF THIS STUDY:**

- 29  
30  
31 113 • PRoVENT-iMIC is an international multicentre observational study with a wide  
32  
33 114 representation of Asian countries, allowing inferences on epidemiology,  
34  
35 115 management and outcomes of mechanical ventilation across the entire  
36  
37 116 subcontinent.
- 38  
39 117 • The attention on ventilation practice will provide robust data on this specific  
40  
41 118 domain while the 7 days follow-up will allow precise recording of pulmonary  
42  
43 119 complications at their origin.
- 44  
45 120 • The study will have a sample size large enough to obtain precise estimates of  
46  
47 121 pulmonary complications and ICU mortality and to examine potential associations  
48  
49 122 between ventilation practice and these outcomes.
- 50  
51 123 • One limitation is the potential constraint of laboratory data, generating a limited  
52  
53 124 dataset not comprising daily severity scores useful for statistical controlling  
54  
55 125 purposes.
- 56  
57  
58  
59  
60

- 1  
2  
3 126 • The conceivable limitation in blood gas analysis and imaging examinations may  
4  
5 127 limit the documentation of insurgence or worsening of ARDS and other pulmonary  
6  
7 128 complications.  
8

9 129  
10  
11  
12  
13  
14  
15  
16  
17  
18  
19  
20  
21  
22  
23  
24  
25  
26  
27  
28  
29  
30  
31  
32  
33  
34  
35  
36  
37  
38  
39  
40  
41  
42  
43  
44  
45  
46  
47  
48  
49  
50  
51  
52  
53  
54  
55  
56  
57  
58  
59  
60

For peer review only

## 130 INTRODUCTION

131 Invasive mechanical ventilation is a frequently applied intervention in patients in  
132 intensive care units (ICUs) and a mandatory strategy in patients under general  
133 anaesthesia for surgery. There is increased understanding how invasive ventilation can  
134 harm the lungs, in ICU patients with the acute respiratory distress syndrome (ARDS) [1],  
135 as well as in ICU patients with less injured or uninjured lungs, and in surgery patients  
136 who usually have healthy lungs [2]. A central cause is that invasive ventilation with  
137 positive pressure may overdistend one lung area while failing to recruit another,  
138 compromising gas exchange but also, and more importantly, increasing or inducing  
139 pulmonary injury. There is convincing evidence that this harm can be partly prevented by  
140 adjusting volume and pressure settings on the ventilator. Indeed, use of low tidal  
141 volumes ( $V_T$ ) [3–5], to prevent overdistension, and sufficient positive end–expiratory  
142 pressure (PEEP) [3,5,6], to prevent alveolar collapse or atelectrauma, have both been  
143 found to improve outcomes of various types of patients, and their use is increasingly  
144 recommended [7–9]. Furthermore, the driving pressure seems to be another key  
145 variable in the development of injury caused by mechanical ventilation, as a large  
146 individual patient data metaanalysis showed a clear and consistent association between  
147 driving pressure and mortality [10].

148 Practice of invasive ventilation has evolved over time, with a more extensive use of  
149 ventilator settings that are proven to prevent against so–called ventilator–induced lung  
150 injury. The recent LUNG SAFE (‘Large observational study to UNderstand the Global  
151 impact of Severe Acute respiratory Failure’) showed that by now up to two in every three  
152 patients with ARDS receive so–called lung–protective ventilation[11]. Results of  
153 PRoVENT (‘PRactice of VENTilation in critically ill patients without ARDS at onset of

1  
2  
3 154 ventilation study') are in line with those from LUNG SAFE, showing that one in every two  
4  
5 155 ICU patients without ARDS receive ventilation with lung-protective settings[12]. Results  
6  
7 156 of LAS VEGAS ('Local ASsessment of VEntilatory management during General  
8  
9 157 Anaesthesia for Surgery study') even suggests increased use of lung-protective  
10  
11 158 ventilation in the operating rooms [13]. It should be noticed, though, that LUNG SAFE,  
12  
13 159 PRoVENT, and LAS VEGAS were mainly performed in high-income countries, and  
14  
15 160 exclusively recruiting patients in resource-rich centres, which limits the generalizability  
16  
17 161 of their results to lower-income countries and resource-limited settings. Historical  
18  
19 162 descriptions of cohorts of invasively ventilated patients in resource-poor settings have  
20  
21 163 been published, but these were all small in size, and while suggesting the existence of  
22  
23 164 ventilator-related deaths they largely failed to report key ventilator parameters [14–16].  
24  
25 165 Continued use of high  $V_T$  has been reported in a recent Brazilian study [17], while a  
26  
27 166 study from India suggests a change towards the use of lower  $V_T$  [18].

28  
29  
30  
31  
32  
33 167 There are several reasons to consider important differences with regard to  
34  
35 168 practice of ventilation between resource-rich and resource-limited settings. The  
36  
37 169 disparity in resources may limit the availability as well as the safety of certain ventilator  
38  
39 170 settings [19]. Awareness of the impact of invasive ventilation on lung tissue, and the  
40  
41 171 benefit of using lung-protective ventilation settings could be severely limited [20].  $V_T$  and  
42  
43 172 PEEP may be poorly titrated due to insufficient staffing, and due to the absence of  
44  
45 173 arterial blood gas monitoring, pulse oximetry or capnography [21]. Other reasons not to  
46  
47 174 implement use of low  $V_T$  and sufficient levels of PEEP include alleged side effects  
48  
49 175 associated with their use, like the need for higher respiratory rates, increased sedation  
50  
51 176 requirements, and even the promotion of patient-ventilator asynchrony. As invasive  
52  
53 177 ventilation with higher PEEP may cause hemodynamic instability, limited access to fluids  
54  
55  
56  
57  
58  
59  
60

1  
2  
3 178 and vasoactive drugs may hamper its use. Finally, as resource-poor ICUs are usually  
4  
5 179 situated in tropical countries their case-mix and indications for invasive ventilation are  
6  
7  
8 180 strikingly different [18].  
9

10 181 To gain a better insight into the ventilation practice, outcomes and  
11  
12 182 epidemiological characteristics of ICU patients receiving invasive ventilation in resource-  
13  
14 183 limited settings, we plan to perform the PRoVENT-iMIC ('Practice of VENTilation in  
15  
16  
17 184 Middle-Income Countries study'), a prospective observational cohort study in ICUs in  
18  
19 185 Asia. We also aim to describe the association between certain ventilator settings and  
20  
21  
22 186 patient-centred outcomes. We hypothesize that practice of ventilation is highly variable,  
23  
24 187 in particular with respect to  $V_T$  and PEEP settings. This understanding is fundamental to  
25  
26 188 planning any intervention study in these countries in the future.  
27

28 189  
29  
30  
31  
32  
33  
34  
35  
36  
37  
38  
39  
40  
41  
42  
43  
44  
45  
46  
47  
48  
49  
50  
51  
52  
53  
54  
55  
56  
57  
58  
59  
60



## 190 **METHODS and ANALYSIS**

### 191 *Design and Setting*

192 PRoVENT-iMIC is an international multicentre observational study in consecutive ICU  
193 patients receiving invasive mechanical ventilation during a 28-day period, expected to  
194 run in approximately 60 centres in the following Asian countries: Thailand, Vietnam,  
195 Myanmar, Pakistan, Nepal, Bangladesh, Malaysia, Sri Lanka, Maldives, Iran and India.  
196 These countries belong to the low or middle-income economies, as classified by the  
197 World Bank [22]. PRoVENT-iMIC is conducted in accordance with the declaration of  
198 Helsinki and is registered at [www.clinicaltrials.gov](http://www.clinicaltrials.gov) (trial identification number NCT  
199 03188770). Figure 1 shows the study flow-chart.

### 200 *Study population*

201 Consecutive patients intubated for ventilation during a predefined period of 28 days are  
202 enrolled. Inclusion is not restricted to patients who are intubated in the ICU, as also  
203 patients who started invasive ventilation in the emergency room, normal ward,  
204 community, or operating room directly preceding the present ICU admission are eligible  
205 for participation, without any minimum or maximum hours of ventilation needed for  
206 inclusion. The exclusion criteria include age < 18 years, use of non-invasive ventilation  
207 not followed by invasive ventilation, patients whose invasive mechanical ventilation  
208 started before the 28-day period of inclusion, and patients transferred from another  
209 hospital under invasive ventilation.

210 Patients will be stratified in three groups for comparison of the primary and  
211 secondary endpoints: patients without ARDS, patients without but at risk for  
212 development of ARDS, according to the Lung Injury Prediction Score (LIPS, Table 1)  
213 [23], and patients with ARDS, according to the Berlin Definition [24]. Patients with ARDS

1  
2  
3 214 will also be stratified according to severity of ARDS, based on the oxygenation (mild,  
4  
5 215 moderate and severe ARDS categories).

6  
7  
8 216 *Study conduct*

9  
10 217 Local investigators will screen all patients who start invasive ventilation in one of the  
11  
12 218 participating ICUs during a predefined period of 28-day, lasting from 8:00 AM on the  
13  
14 219 Monday of the first week to 7.59 AM on the Monday four weeks later. The exact starting  
15  
16 220 date will be flexible for participating centres and shall be determined by the national  
17  
18 221 study coordinator. Data collection has started in November 2017 in some sites; all sites  
19  
20 222 are expected to initiate the service evaluation within one year after the overall start.

21  
22  
23 223 *Data to be collected*

24  
25 224 Baseline and demographic variables will be collected on the day of admission, including  
26  
27 225 gender, age, actual or estimated weight and height, smoking status, comorbidities  
28  
29 226 including chronic obstructive pulmonary disease (COPD), active cancer, heart failure,  
30  
31 227 diabetes mellitus, chronic kidney failure, liver cirrhosis and arterial hypertension, the  
32  
33 228 presence of ARDS according to the Berlin Definition, the LIPS, reason for ICU  
34  
35 229 admission. On the day of start of invasive ventilation we will document the reason for  
36  
37 230 starting mechanical ventilation, and whether the patient received non-invasive ventilation  
38  
39 231 before intubation.

40  
41  
42 232 Every day, until day 3 from admission in the ICU, until ICU discharge or death,  
43  
44 233 whichever comes first, the ventilation status and ventilation characteristics will be  
45  
46 234 collected, including ventilation mode,  $V_T$  size, respiratory rate (set and measured), peak  
47  
48 235 and plateau pressure, PEEP, inspired oxygen fraction, peripheral oxygen saturation,  
49  
50 236 blood gas analysis data when available ( $PaO_2$ ,  $PaCO_2$ , arterial bicarbonate, arterial pH),  
51  
52  
53  
54  
55  
56  
57  
58  
59  
60

1  
2  
3 237 end-tidal CO<sub>2</sub>, when available and hemodynamic parameters like heart rate and systolic  
4  
5 238 blood pressure.  
6

7 239 Every day, until day 7, ICU discharge or death, whichever comes first, the  
8  
9 240 occurrence of pulmonary complications will be scored, including new requirement of  
10  
11 241 invasive ventilation after initial extubation, pulmonary infections, atelectasis,  
12  
13 242 pneumothorax, pleural effusions, new pulmonary infiltrates and development or  
14  
15 243 worsening of ARDS.  
16  
17

18 244 On the day of ICU discharge (maximum 60 days after recruitment) outcome will  
19  
20 245 be recorded as follows: death, discharge to ward, to medium care or high dependency  
21  
22 246 unit, discharge to home for palliative care, or transfer to another ICU. The date of  
23  
24 247 extubation, reintubation and tracheostomy (if performed) will also be recorded in this  
25  
26 248 moment.  
27  
28

### 29 249 *Study endpoints*

30  
31 250 The primary endpoint is V<sub>T</sub>-size in millilitres per kilogram of predicted body weight  
32  
33 251 (ml/kg PBW) and PEEP in centimetres of water (cm H<sub>2</sub>O) used amongst diverse ICU  
34  
35 252 patient categories during the first three days of mechanical ventilation. Secondary  
36  
37 253 clinical endpoints include other ventilation parameters (including respiratory system  
38  
39 254 driving pressure, the proportion of patients at risk of ARDS as stratified by the LIPS, or  
40  
41 255 ARDS defined by the Berlin Definition, the occurrence of pulmonary complications,  
42  
43 256 length of stay in ICU, duration of invasive ventilation and all-cause ICU-mortality.  
44  
45  
46

### 47 257 *Definitions*

48  
49 258 All cause ICU-mortality is defined as any death in the ICU. ICU length of stay is defined  
50  
51 259 as the time between ICU admission and ICU discharge or death in ICU. The number of  
52  
53 260 days of ventilation is defined as time between endotracheal intubation and successful  
54  
55  
56  
57  
58  
59  
60

1  
2  
3 261 extubation (in case of intermittent mechanical ventilation via a tracheostomy, every day  
4  
5 262 a patient needs ventilation counts as one extra day, irrespective of the duration of  
6  
7 263 ventilation on that specific day). In case of non-invasive ventilation, the duration will be  
8  
9  
10 264 assessed separated from the assessment of invasive ventilation. The presence of  
11  
12 265 spontaneous activity will be identified by any recorded difference between the set and  
13  
14 266 measured respiratory rate.

15  
16  
17 267 Driving pressure will be calculated by subtracting the level of PEEP from the  
18  
19 268 plateau pressure (Pplat in volume-control ventilation) or maximal airway pressure  
20  
21 269 (Pmax in pressure control ventilation). Pplat and Pmax are considered reliable for this  
22  
23 270 calculation if the patient is receiving complete ventilatory assistance without evidence of  
24  
25 271 spontaneous activity, i.e., only when the set respiratory rate equals the measured  
26  
27 272 respiratory rate. Peak airways pressures will not be used to compute driving pressure as  
28  
29 273 these represent a poor surrogate of the plateau pressure. Only pulmonary complications  
30  
31 274 that occur after the first 24 hours of invasive ventilation will be considered in analysis, as  
32  
33 275 events preceding this time point may very well be considered the potential reason for  
34  
35 276 intubation. A pulmonary infection requires the presence of new or changed lung  
36  
37 277 opacities on chest radiography and/or new or changed sputum plus at least a  
38  
39 278 temperature  $> 38.3$  °C or a white blood cell count  $>12,000$  per microliter of blood.  
40  
41 279 Atelectasis require the presence of increased density (lung opacity) on one or more  
42  
43 280 chest radiographs with displacement of the fissures toward the area of atelectasis,  
44  
45 281 crowding of pulmonary vessels and bronchi in the atelectatic region, upward  
46  
47 282 displacement of hemidiaphragm ipsilateral to the side of atelectasis, that may be  
48  
49 283 accompanied by shift of the mediastinum or hilum towards the affected area and  
50  
51 284 compensatory overinflation in the unaffected lung [25]. Pleural effusion is suggested by  
52  
53  
54  
55  
56  
57  
58  
59  
60

1  
2  
3 285 lung opacification with shift of the mediastinum, hilum or hemi-diaphragm towards the  
4  
5 286 non-affected area. Pneumothorax requires the presence of air in the pleural space with  
6  
7 287 no vascular bed surrounding the visceral pleura. ARDS is defined according to the Berlin  
8  
9 288 Definition [24] with alternative oxygenation criteria based on  $SpO_2/FiO_2$  applicable only  
10  
11 289 when blood gas analysis data is unavailable (Table 2a and 2b) [26,27]. Worsening of  
12  
13 290 ARDS is defined as any change in the prior classification (i.e., from mild to moderate or  
14  
15 291 severe ARDS, or from moderate to severe ARDS).

### 19 292 *Data management*

20  
21 293 Data will be collected from a paper medical chart, or an electronic patient data  
22  
23 294 management system if available. Local investigators transcribe the collected data  
24  
25 295 directly onto an anonymized internet-based electronic CRF (REDCap – Research  
26  
27 296 Electronic Data Capture [28], [www.projectredcap.org](http://www.projectredcap.org)). In some centres data may be  
28  
29 297 recorded on paper CRF and successively transcribed on the electronic CRF at a later  
30  
31 298 time point. Access to the data-entry system is protected by a personalized username  
32  
33 299 and password. The data will be kept on a central secured server located at the Hospital  
34  
35 300 Israelita Albert Einstein, Sao Paulo, Brazil. The structure of the electronic CRF is  
36  
37 301 detailed in Figure 2. A screening-log with limited patient data will be completed with all  
38  
39 302 the included and excluded patients during the enrolment window. Participating centres  
40  
41 303 are instructed to enter data for the daily follow-up using values obtained as close as  
42  
43 304 possible to 08:00 AM, but only when the patient is stable at that time point. The study  
44  
45 305 day for the recording of pulmonary complications will be defined as the natural 24h  
46  
47 306 period from 00:00 until 23:59, to ensure that data is captured only once. Data for ICU-  
48  
49 307 discharge will be collected until a maximum of 60 days after ICU admission, after which  
50  
51 308 the CRF for that patient will be closed.

1  
2  
3 309 *Study sites*  
4

5 310 P<sub>RO</sub>VENT-iMIC will be conducted in 11 Asian countries, with a varying number of ICUs  
6  
7 311 per country. Participating ICUs are selected on the basis of willingness to participate.  
8  
9 312 There are no a priori established requirements for participation, and private as well as  
10  
11 313 public centres are eligible to represent real-life practices. A one-time web-based pre-  
12  
13 314 study survey on structure, organizational aspects and delivery of care in the participating  
14  
15 315 centres will be performed. Each participating centre is surveyed once regarding the  
16  
17 316 following information: hospital characteristics (private vs. public), ICU characteristics  
18  
19 317 (medical vs. surgical vs. mixed, and open vs. closed, number of ICU beds, annual  
20  
21 318 number of patient admitted, number of ventilators available, and other organ support  
22  
23 319 measures), and staffing (nurse to patient ratio, physician to patient ratio, presence of  
24  
25 320 specialized medical staff, and overnight coverage).  
26  
27  
28  
29

30  
31 321 *Statistical Analysis Plan*  
32

33 322 No formal sample size calculation was performed, but we expect each centre to enrol 20  
34  
35 323 to 40 patients in the allocated time period, yielding a total of 1,200 to 2,400 patients. We  
36  
37 324 consider this figure sufficient to analyse the study endpoints.  
38  
39

40 325 Normally distributed variables will be expressed by their mean and standard  
41  
42 326 deviation; not normally distributed variables will be expressed by their medians and  
43  
44 327 interquartile ranges; categorical variables will be expressed as n (%). In test groups of  
45  
46 328 continuous normally distributed variables, Student's t-test will be used. Likewise if  
47  
48 329 continuous data are not normally distributed the Mann Whitney U test will be used.  
49  
50 330 Categorical variables will be compared with the Chi-square test or Fisher's exact test or  
51  
52 331 when appropriate as relative risks. Statistical uncertainty will be expressed by 95%  
53  
54 332 confidence levels.  
55  
56  
57  
58  
59  
60

1  
2  
3 333 The primary outcome ( $V_T$  size [ml/kg PBW] and PEEP [cm H<sub>2</sub>O] levels during the  
4  
5 334 first three days of mechanical ventilation) – will be analysed and compared between  
6  
7  
8 335 patients at no risk for ARDS, patients at risk for ARDS and in patients with ARDS (in  
9  
10 336 case the diagnosis of ARDS could be made on admission). If the data is normally  
11  
12 337 distributed, one way Analysis of Variance (ANOVA) or two-way ANOVA assessing the  
13  
14 338 time–interaction between groups and days of observation will be used. When not  
15  
16  
17 339 normally distributed the Kruskal–Wallis test or Friedman test assessing the time–  
18  
19 340 interaction between groups and days of observation will be used.

21 341 Univariate analysis will be performed to identify potential factors associated with  
22  
23 342 outcomes including, but not limited to, ventilator settings (in particular  $V_T$  and PEEP). A  
24  
25 343 multivariate logistic regression model will be used to determine which of those factors  
26  
27  
28 344 are independent. A stepwise approach will be used to enter new terms into the model,  
29  
30 345 with a limit of  $P < 0.2$  to enter the terms. Time to event variables is analysed using Cox  
31  
32  
33 346 regression and visualized by Kaplan–Meier.

35 347 Time–course variables (e.g. repeated measures of ventilator parameters, vital  
36  
37 348 signs, oxygenation parameters and others) are also analysed by linear mixed model.  
38  
39 349 The linear mixed models procedure expands the generalized linear model (GLM) so that  
40  
41  
42 350 the data are permitted to exhibit correlated and non–constant variability.

44 351 Pre–specified subgroups in the analyses studying potential associations between  
45  
46 352 ventilator settings and outcome will be: (1) patients at low risk of ARDS vs. patients at  
47  
48 353 risk of ARDS; (2) patients without ARDS vs. patients with ARDS; (3) reason for ICU  
49  
50 354 admission; and (4) reason for start of invasive ventilation. Statistical analyses will be  
51  
52  
53 355 conducted using R ([www.r-project.org](http://www.r-project.org)). A  $P$ –value of less than 0.05 will be considered  
54  
55  
56 356 statistically significant.

1  
2  
3 357 *Study organization*  
4

5 358 The Steering Committee is composed of a selection of PROVE Network investigators  
6  
7 359 plus the national coordinators from each participating country. These investigators were  
8  
9  
10 360 involved in the design of PRoVENT–iMIC. National coordinators are responsible for  
11  
12 361 identifying and recruiting local participating centres. They assist and train the local  
13  
14 362 investigators and oversee the conduct of the study, including administrative  
15  
16 363 management, record keeping and data management. Local investigators in individual  
17  
18 364 participating centres will provide scientific and structural leadership, ensuring local  
19  
20 365 ethical and regulatory approvals are obtained before start of patient inclusion. National  
21  
22 366 Coordinators and Local Investigators are expected to guarantee the quality and security  
23  
24 367 of the data collected.  
25  
26  
27

28 368 Prior to start of the study, study teams in each centre will undergo a web–based  
29  
30 369 training session on how to capture data in the electronic CRF. All study team members  
31  
32 370 will be provided with a manual of operations with instructions on how to accurately fill the  
33  
34 371 forms and the screening log. Incomplete or incorrectly entered electronic CRFs will be  
35  
36 372 signalled to the local investigators by the national and international coordinator, for  
37  
38 373 further review of the missing or flagged data.  
39  
40  
41

42 374  
43

44 375  
45  
46  
47  
48  
49  
50  
51  
52  
53  
54  
55  
56  
57  
58  
59  
60



1  
2  
3 376 **ETHICS AND DISSEMINATION**  
4

5 377 The Oxford Tropical Research Ethical Committee (OxTREC) at the University of Oxford,  
6  
7 378 United Kingdom, exempted the study from ethical review on the 9<sup>th</sup> of June 2017. Data  
8  
9  
10 379 management, monitoring and reporting of the study will be performed in accordance with  
11  
12 380 the International Conference on Harmonization – Good Clinical Practice guidelines.  
13

14 381 All participating centres will also submit the study protocol to the national or local  
15  
16 382 Institutional Review Board for ethical judgment, as applicable by the current regulations  
17  
18 383 in the country. Due to the strict observational design and anonymous collection of data,  
19  
20 384 informed consent may not be required in most countries. However, where informed  
21  
22 385 consent is required, this must be approved by the local ethical committee before the  
23  
24 386 start of inclusion.  
25  
26  
27

28 387 The study will be reported following the Strengthening the reporting of  
29  
30 388 Observational Studies in Epidemiology (STROBE) statement guidelines and checklists  
31  
32 389 [29]. The results of this study will be published in a peer-reviewed medical journal. After  
33  
34 390 publication of the primary results, on request the pooled dataset will be available for all  
35  
36 391 members of the PRoVENT–iMIC collaboration for secondary analysis, after judgment  
37  
38 392 and approval of scientific quality and validity of the proposed analysis by the Steering  
39  
40 393 Committee.  
41  
42  
43

44 394  
45  
46  
47  
48  
49  
50  
51  
52  
53  
54  
55  
56  
57  
58  
59  
60

1  
2  
3 395 **DISCUSSION**  
4

5 396 PRoVENT–iMIC is designed to characterize the epidemiology, ventilator management,  
6  
7 397 occurrence of pulmonary complications and outcomes in invasively ventilated patients in  
8  
9  
10 398 an estimated 60 ICUs in 11 Asian countries. The results of PRoVENT–iMIC will help to  
11  
12 399 understand current ventilation practice in South and Southeast Asia, particularly with  
13  
14 400 respect to variability in ventilator settings amongst patients without, at risk for or with  
15  
16 401 established ARDS. Results of this study will be used to plan future trials of ventilation in  
17  
18 402 ICU patients in these settings.  
19

20  
21 403 PRoVENT–iMIC has several strengths. First, its prospective design will allow a  
22  
23 404 higher accuracy of data capturing with regard to exposures, confounders and endpoints  
24  
25 405 compared to studies that used a retrospective design [30]. While a prospective design  
26  
27 406 may cause sources of bias or establish causal effects, it minimizes the chance of  
28  
29 407 residual confounding by unmeasured variables, a common limitation with a retrospective  
30  
31 408 design, as has frequently been used in mechanical ventilation epidemiological studies  
32  
33 409 [31–33]. We will have a sample size large enough to obtain precise estimates of  
34  
35 410 pulmonary complications and ICU mortality and to examine potential associations  
36  
37 411 between ventilation practice and patient outcomes. Second, the study sample is not  
38  
39 412 restricted to certain patient diagnostic categories. Third, the attention on ventilation  
40  
41 413 practice will provide robust data on this specific domain while the 7 days follow–up will  
42  
43 414 allow precise recording of pulmonary complications at their origin. And finally, the wide  
44  
45 415 representation of Asian countries will allow inferences on geo–economic differences in  
46  
47 416 epidemiology, management and outcomes of mechanical ventilation across the entire  
48  
49  
50  
51  
52  
53 417 subcontinent.  
54  
55  
56  
57  
58  
59  
60

1  
2  
3 418 The focus on South and Southeast Asia follows our scarce knowledge about  
4  
5 419 clinical practices and ventilation strategies used in critically ill patients in this and other  
6  
7 420 resource-limited settings [21]. The burden of critical illness in low- and middle-income  
8  
9 421 countries is higher than generally perceived and it is expected to increase with an aging  
10  
11 422 population [34]. Additionally, ICUs are increasingly being set up in the region, especially  
12  
13 423 in busy urban settings. A recent survey highlighted considerable variation in structure,  
14  
15 424 organization and critical care delivery in Asian ICUs, but did not shed light on ventilation  
16  
17 425 management and patient-centred ventilation-associated outcomes [35]. This  
18  
19 426 information, however, is crucial for future trials of ventilation in ICU patients in these  
20  
21 427 settings, as we need to know whether critically ill patients across Asia equally benefit  
22  
23 428 from lung-protective ventilation as those in Western countries. Additionally, for proper  
24  
25 429 power calculations, information with regard to potential primary endpoints, like the  
26  
27 430 incidence of development of ARDS, duration of ventilation or death, is highly needed.  
28  
29 431 PRoVENT-iMIC will be the first observational study that can provide this information for  
30  
31 432 settings in South Asia. Results restricted to individual settings could also be valuable for  
32  
33 433 local clinicians seeking to improve their local practice, training planning and identify local  
34  
35 434 priorities for quality improvement within their departments.  
36  
37  
38  
39  
40  
41

42 435 There is now strong evidence-based support for various ICU process-based  
43  
44 436 interventions such as lung protective ventilation[36], conservative fluid management  
45  
46 437 strategies[37] and weaning protocols [38]. While centre- or country-specific practices or  
47  
48 438 restrictions of resources are potential challenges that affect implementation of all these  
49  
50 439 interventions, we focus on the management of ventilation and especially on the  
51  
52 440 employment of lung-protective ventilation where feasibility may represent an issue  
53  
54 441 specific to resource-limited settings. Recent literature has underlined the potential role  
55  
56  
57  
58  
59

1  
2  
3 442 of the driving pressure (the pressure amplitude during each artificial breath) and its  
4  
5 443 determinants in the development of ventilator-associated lung injury. Results from  
6  
7 444 PRoVENT-iMIC will provide further data to enable us to discriminate the effects of  $V_T$   
8  
9  
10 445 size, PEEP and driving pressure on outcomes in patients with, at risk of, or without  
11  
12 446 ARDS.

13  
14 447 PRoVENT-iMIC will provide important data regarding outcomes following  
15  
16 448 invasive ventilation, including a wide range of clinically important pulmonary  
17  
18 449 complications. Historical studies from low-resource settings documented mortality rates  
19  
20 450 to exceed 70% [14–16]. However more recent data from South America and India have  
21  
22 451 documented mortality rates of ~40%, similar to that in high-income countries[17,18].  
23  
24 452 This suggests that mortality in ventilated patients has the potential to improve in low-  
25  
26 453 resource settings [12,13,39]. Although many factors may influence mortality, several  
27  
28 454 underappreciated factors related to invasive ventilation may have contributed, including  
29  
30 455 reduced need for invasive ventilation per se, improvements in safety of invasive  
31  
32 456 ventilation and in liberation from invasive ventilation.

33  
34  
35  
36  
37 457 Our interest in patients at risk of ARDS follows a global recent shift in ARDS  
38  
39 458 research. It is now clear that ARDS is rarely present at the time of the initial healthcare  
40  
41 459 encounter, and typically develops during the hospital course, usually between days 2  
42  
43 460 and 5 in patients with predisposing conditions or risk factors [40]. Hence increasing  
44  
45 461 efforts are being directed toward early identification of patients at risk with a goal of  
46  
47 462 prevention and early treatment prior to the development of a fully established syndrome.  
48  
49 463 This is probably equally important in resource-limited settings where the predisposing  
50  
51 464 conditions and risk modifiers for ARDS may differ and limited escalation of therapy is  
52  
53 465 often the case. PRoVENT-iMIC will be the first study to evaluate prospectively the role  
54  
55  
56  
57  
58  
59  
60

1  
2  
3 466 of LIPS in these settings. Although the poor predictive accuracy of the LIPS does not  
4  
5 467 currently support its use in everyday clinical practice [41], it has enabled enrolment in  
6  
7 468 clinical trials of ARDS prevention [23] and may yield an initial idea on the patients at risk  
8  
9  
10 469 of and disease progression in the Asian settings under study.

11  
12 470 PRoVENT-iMIC has some noticeable shortcomings. The definition of 'middle-  
13  
14 471 income' country is rather artificial as the level of health expenditure, local resources and  
15  
16 472 other geo-cultural factors might affect the processes of care in a larger extent than  
17  
18 473 national income classification. Despite the inclusion of ICUs from 11 countries, which  
19  
20 474 improves study generalizability, caution is needed when applying the results to  
21  
22 475 supposedly similar settings, as substantial intra- and trans-national variations in ICU  
23  
24 476 resources, staffing and organization exist. Second, the case report form used in  
25  
26 477 PRoVENT-iMIC was designed so that it would not induce excessive work-load for the  
27  
28 478 participating centres. Therefore, we decided not to collect data regarding extra-  
29  
30 479 pulmonary complications and hospital-discharge outcomes, neither the amounts of  
31  
32 480 sedation used and sedation levels. Similarly, due to the time window restricted to the  
33  
34 481 ICU stay, we will apply the LIPS at ICU admission and not in the first 6 hours after  
35  
36 482 hospital admission, as originally designed. Mortality may be underestimated in some  
37  
38 483 settings where due to local practices there is the possibility to be discharged home in  
39  
40 484 case of terminal conditions or family decision. To address this we made sure the data  
41  
42 485 collection form captures this event whenever it represents the reason of discharge.  
43  
44 486 Third, due to the limitation of laboratory data we will have a limited dataset that will not  
45  
46 487 comprise daily severity scores useful for statistical controlling purposes. Also, the  
47  
48 488 conceivable limitation in blood gas analysis and radiology exams may limit the  
49  
50 489 documentation of insurgence or worsening of ARDS and other pulmonary complications.  
51  
52  
53  
54  
55  
56  
57  
58  
59  
60

1  
2  
3 490 Finally, we cannot exclude that ventilator settings applied by treating physicians might  
4  
5 491 be biased by the participation in the study, a problem that also existed in prior  
6  
7 492 multinational studies [11,12]. Also participation in international studies like P<sub>Ro</sub>VENT–  
8  
9 493 iMIC always bears the risk of biased to those centres that do not fully or reliably  
10  
11  
12 494 represent ICU–care in general in the participating countries.  
13  
14  
15 495

For peer review only

1  
2  
3 496 **CONCLUSIONS**  
4

5 497 P<sub>RO</sub>VENT–iMIC is designed to understand the epidemiology, practice of ventilation, and  
6  
7 498 outcomes of critically–ill patients receiving invasive ventilation in a large set of South  
8  
9  
10 499 Asian countries. Results of this study could help identify practices that may best explain  
11  
12 500 differences in outcomes, and could be used in designing new trials of ventilation in these  
13  
14 501 settings.  
15  
16

17 502  
18  
19  
20  
21  
22  
23  
24  
25  
26  
27  
28  
29  
30  
31  
32  
33  
34  
35  
36  
37  
38  
39  
40  
41  
42  
43  
44  
45  
46  
47  
48  
49  
50  
51  
52  
53  
54  
55  
56  
57  
58  
59  
60

For peer review only

1  
2  
3 503 **Author affiliations**  
4

5 504 **Contributors**  
6

7 505 LP, AGA, ASN, AMD and MJS were equally responsible for writing of the manuscript  
8 and participated in study design. FP, PP participated in study design and assisted in  
9 writing of the manuscript. AA, AB, KC, AF, RaH, ReH, MH, HAI, KI, SI, GK, BK, HM, BN,  
10 RP, SS, LT, SG, NNT, NMY, MGdA reviewed the manuscript and agreed with  
11 submission.  
12  
13  
14  
15  
16  
17  
18

19 510  
20  
21 511 **Funding**  
22  
23 512 This research received no specific grant from any funding agency in the public,  
24 commercial or not-for profit sectors.  
25  
26  
27

28 514  
29  
30 515 **Competing interests**  
31

32 516 None  
33  
34  
35  
36

37 518 **Ethics approval**  
38

39 519 The Oxford Tropical Research Ethical Committee (OxTREC) at the University of Oxford,  
40 United Kingdom, exempted the study from ethical review on the 9<sup>th</sup> of June 2017. IRB  
41 approval was obtained from Sri Lanka, Bangladesh and Malaysia and is underway in  
42 Myanmar, Iran, India, Vietnam, Thailand, Nepal, Pakistan and Maldives.  
43  
44  
45  
46  
47  
48

49 523  
50  
51  
52  
53  
54  
55  
56  
57  
58  
59  
60



524 **REFERENCES**

- 525 1 Slutsky AS, Ranieri VM. Ventilator-induced lung injury. *N Engl J Med*  
526 2014;**370**:980. doi:10.1056/NEJMc1400293
- 527 2 Serpa N, Schultz M, Slutsky A. Current concepts of protective ventilation during  
528 general anaesthesia. *Swiss Med Wkly* 2015;**145**:w14211.  
529 doi:10.4414/smw.2015.14211
- 530 3 Putensen C, Theuerkauf N, Zinserling J, *et al.* Meta-analysis: ventilation strategies  
531 and outcomes of the acute respiratory distress syndrome and acute lung injury.  
532 *Ann Intern Med* 2009;**151**:566–76.
- 533 4 Serpa Neto A, Cardoso SO, Manetta JA, *et al.* Association Between Use of Lung-  
534 Protective Ventilation With Lower Tidal Volumes and Clinical Outcomes Among  
535 Patients Without Acute Respiratory Distress Syndrome. *JAMA* 2012;**308**:1651.  
536 doi:10.1001/jama.2012.13730
- 537 5 Güldner A, Kiss T, Serpa Neto A, *et al.* Intraoperative Protective Mechanical  
538 Ventilation for Prevention of Postoperative Pulmonary Complications.  
539 *Anesthesiology* 2015;**123**:692–713. doi:10.1097/ALN.0000000000000754
- 540 6 Briel M, Meade M, Mercat A, *et al.* Higher vs lower positive end-expiratory  
541 pressure in patients with acute lung injury and acute respiratory distress  
542 syndrome: systematic review and meta-analysis. *JAMA* 2010;**303**:865–73.  
543 doi:10.1001/jama.2010.218
- 544 7 Ferguson ND. Low Tidal Volumes for All? *JAMA* 2012;**308**:1689.  
545 doi:10.1001/jama.2012.14509
- 546 8 Serpa Neto A, Nagtzaam L, Schultz MJ. Ventilation with lower tidal volumes for  
547 critically ill patients without the acute respiratory distress syndrome: a systematic

- 1  
2  
3 548 translational review and meta-analysis. *Curr Opin Crit Care* 2014;**20**:25–32.  
4  
5 549 doi:10.1097/MCC.0000000000000044  
6  
7  
8 550 9 Dellinger RP, Levy MM, Rhodes A, *et al*. Surviving sepsis campaign: International  
9  
10 551 guidelines for management of severe sepsis and septic shock, 2012. *Intensive*  
11  
12 552 *Care Med* 2013;**39**:165–228. doi:10.1007/s00134-012-2769-8  
13  
14 553 10 Amato MBP, Meade MO, Slutsky AS, *et al*. Driving pressure and survival in the  
15  
16  
17 554 acute respiratory distress syndrome. *N Engl J Med* 2015;**372**:747–55.  
18  
19 555 doi:10.1056/NEJMsa1410639  
20  
21 556 11 Bellani G, Gattinoni L, Haren F Van, *et al*. Epidemiology, Patterns of Care, and  
22  
23  
24 557 Mortality for Patients With Acute Respiratory Distress Syndrome in Intensive Care  
25  
26 558 Units in 50 Countries. *JAMA* 2016;**315**:2526–33.  
27  
28 559 12 Neto AS, Barbas CS V, Simonis FD, *et al*. Epidemiological characteristics, practice  
29  
30  
31 560 of ventilation, and clinical outcome in patients at risk of acute respiratory distress  
32  
33 561 syndrome in intensive care units from 16 countries (PRoVENT): an international,  
34  
35 562 multicentre, prospective study. *Lancet Respir Med* 2016;**4**:882–93.  
36  
37 563 doi:10.1016/S2213-2600(16)30305-8  
38  
39  
40 564 13 Epidemiology, practice of ventilation and outcome for patients at increased risk of  
41  
42 565 postoperative pulmonary complications. *Eur J Anaesthesiol* 2017;**34**:492–507.  
43  
44 566 doi:10.1097/EJA.0000000000000646  
45  
46  
47 567 14 Sinclair JR, Watters DA, Davison M. Outcome of mechanical ventilation in Central  
48  
49 568 Africa. *Ann R Coll Surg Engl* 1988;**70**:76–9.  
50  
51 569 15 Rajapakse VP, Wijsekera S. Outcome of mechanical ventilation in Sri Lanka. *Ann*  
52  
53 570 *R Coll Surg Engl* 1989;**71**:344–6.  
54  
55  
56 571 16 Sudarsanam TD, Jeyaseelan L, Thomas K, *et al*. Predictors of mortality in  
57  
58  
59  
60

- 1  
2  
3 572 mechanically ventilated patients. *Postgrad Med J* 2005;**81**:780–3.  
4  
5 573 doi:10.1136/pgmj.2005.033076  
6  
7 574 17 Azevedo LC, Park M, Salluh JI, *et al*. Clinical outcomes of patients requiring  
8 ventilatory support in Brazilian intensive care units: a multicenter, prospective,  
9 cohort study. *Crit Care* 2013;**17**:R63. doi:10.1186/cc12594  
10 575  
11  
12 576  
13  
14 577 18 Karthikeyan B, Kadiravan T, Deepanjali S, *et al*. Case-Mix, Care Processes, and  
15 Outcomes in Medically-Ill Patients Receiving Mechanical Ventilation in a Low-  
16 Resource Setting from Southern India: A Prospective Clinical Case Series. *PLoS*  
17 *One* 2015;**10**:e0135336. doi:10.1371/journal.pone.0135336  
18  
19 579  
20  
21 580  
22  
23 581 19 Serpa Neto A, Schultz MJ, Festic E. Ventilatory support of patients with sepsis or  
24 septic shock in resource-limited settings. *Intensive Care Med* 2016;**42**:100–3.  
25  
26 582  
27  
28 583  
29  
30 584 20 Haniffa R, Lubell Y, Cooper BS, *et al*. Impact of a structured ICU training  
31 programme in resource-limited settings in Asia. *PLoS One* 2017;**12**:e0173483.  
32  
33 585  
34  
35 586  
36  
37 587 21 Dünser MW, Baelani I, Ganbold L, *et al*. A review and analysis of intensive care  
38 medicine in the least developed countries\*. *Crit Care Med* 2006;**34**:1234–42.  
39  
40 588  
41  
42 589  
43  
44 590 22 The World Bank. World Bank Country Classification.  
45  
46 591  
47 https://datahelpdesk.worldbank.org/knowledgebase/topics/19280-country-  
48  
49 592  
50  
51 593 23 Gajic O, Dabbagh O, Park PK, *et al*. Early identification of patients at risk of acute  
52 lung injury: evaluation of lung injury prediction score in a multicenter cohort study.  
53  
54 594  
55  
56 595  
57  
58  
59  
60

- 1  
2  
3 596 24 The ARDS Definition Task Force\*, Ranieri VM, Rubenfeld GD, *et al.* Acute  
4  
5 597 respiratory distress syndrome: the Berlin Definition. *JAMA J Am Med Assoc*  
6  
7 598 2012;**307**:1. doi:10.1001/jama.2012.5669  
8  
9  
10 599 25 Ashizawa K, Hayashi K, Aso N, *et al.* Lobar atelectasis: diagnostic pitfalls on chest  
11  
12 600 radiography. *Br J Radiol* 2001;**74**:89–97. doi:10.1259/bjr.74.877.740089  
13  
14 601 26 Riviello ED, Kiviri W, Twagirumugabe T, *et al.* Hospital Incidence and Outcomes of  
15  
16 602 the Acute Respiratory Distress Syndrome Using the Kigali Modification of the  
17  
18 603 Berlin Definition. *Am J Respir Crit Care Med* 2016;**193**:52–9.  
19  
20 604 doi:10.1164/rccm.201503-0584OC  
21  
22  
23 605 27 Rice TW, Wheeler AP, Bernard GR, *et al.* Comparison of the SpO<sub>2</sub>/FIO<sub>2</sub> ratio  
24  
25 606 and the PaO<sub>2</sub>/FIO<sub>2</sub> ratio in patients with acute lung injury or ARDS. *Chest*  
26  
27 607 2007;**132**:410–7. doi:10.1378/chest.07-0617  
28  
29  
30 608 28 Harris PA, Taylor R, Thielke R, *et al.* Research electronic data capture (REDCap)-  
31  
32 609 -a metadata-driven methodology and workflow process for providing translational  
33  
34 610 research informatics support. *J Biomed Inform* 2009;**42**:377–81.  
35  
36 611 doi:10.1016/j.jbi.2008.08.010  
37  
38  
39 612 29 von Elm E, Altman DG, Egger M, *et al.* The Strengthening the Reporting of  
40  
41 613 Observational Studies in Epidemiology (STROBE) statement: guidelines for  
42  
43 614 reporting observational studies. *Lancet* 2007;**370**:1453–7. doi:10.1016/S0140-  
44  
45 615 6736(07)61602-X  
46  
47  
48 616 30 Euser AM, Zoccali C, Jager KJ, *et al.* Cohort Studies: Prospective versus  
49  
50 617 Retrospective. *Nephron Clin Pract* 2009;**113**:c214–7. doi:10.1159/000235241  
51  
52  
53 618 31 Gajic O, Dara SI, Mendez JL, *et al.* Ventilator-associated lung injury in patients  
54  
55 619 without acute lung injury at the onset of mechanical ventilation. *Crit Care Med*  
56  
57  
58  
59  
60

- 1  
2  
3 620 2004;**32**:1817–24.  
4  
5 621 32 Rush B, Biagioni BJ, Berger L, *et al.* Mechanical Ventilation Outcomes in Patients  
6  
7 622 With Pulmonary Hypertension in the United States: A National Retrospective  
8  
9 623 Cohort Analysis. *J Intensive Care Med* 2017;**32**:588–92.  
10  
11 624 doi:10.1177/0885066616653926  
12  
13  
14 625 33 Pesaro AEP, Katz M, Katz JN, *et al.* Mechanical Ventilation and Clinical Outcomes  
15  
16 626 in Patients with Acute Myocardial Infarction: A Retrospective Observational Study.  
17  
18 627 *PLoS One* 2016;**11**:e0151302. doi:10.1371/journal.pone.0151302  
19  
20  
21 628 34 Adhikari NKJ, Fowler RA, Bhagwanjee S, *et al.* Critical care and the global burden  
22  
23 629 of critical illness in adults. *Lancet (London, England)* 2010;**376**:1339–46.  
24  
25 630 doi:10.1016/S0140-6736(10)60446-1  
26  
27  
28 631 35 Arabi YM, Phua J, Koh Y, *et al.* Structure, Organization, and Delivery of Critical  
29  
30 632 Care in Asian ICUs\*. *Crit Care Med* 2016;**44**:e940–8.  
31  
32 633 doi:10.1097/CCM.0000000000001854  
33  
34  
35 634 36 Acute Respiratory Distress Syndrome Network, Brower RG, Matthay MA, *et al.*  
36  
37 635 Ventilation with Lower Tidal Volumes as Compared with Traditional Tidal Volumes  
38  
39 636 for Acute Lung Injury and the Acute Respiratory Distress Syndrome. *N Engl J Med*  
40  
41 637 2000;**342**:1301–8. doi:10.1056/NEJM200005043421801  
42  
43  
44 638 37 National Heart, Lung, and Blood Institute Acute Respiratory Distress Syndrome  
45  
46 639 (ARDS) Clinical Trials Network, Wiedemann HP, Wheeler AP, *et al.* Comparison  
47  
48 640 of two fluid-management strategies in acute lung injury. *N Engl J Med*  
49  
50 641 2006;**354**:2564–75. doi:10.1056/NEJMoa062200  
51  
52  
53 642 38 Girard TD, Kress JP, Fuchs BD, *et al.* Efficacy and safety of a paired sedation and  
54  
55 643 ventilator weaning protocol for mechanically ventilated patients in intensive care  
56  
57  
58  
59  
60

- 1  
2  
3 644 (Awakening and Breathing Controlled trial): a randomised controlled trial. *Lancet*  
4  
5 645 (*London, England*) 2008;**371**:126–34. doi:10.1016/S0140-6736(08)60105-1  
6  
7 646 39 Esteban A, Frutos-Vivar F, Muriel A, *et al.* Evolution of Mortality over Time in  
8  
9 Patients Receiving Mechanical Ventilation. *Am J Respir Crit Care Med*  
10 647  
11 2013;**188**:220–30. doi:10.1164/rccm.201212-2169OC  
12 648  
13  
14 649 40 Gajic O, Dabbagh O, Park PK, *et al.* Early Identification of Patients at Risk of  
15  
16 Acute Lung Injury: Evaluation of Lung Injury Prediction Score in a Multicenter  
17 650  
18 Cohort Study. *Am J Respir Crit Care Med* 2010;;1–33. doi:10.1164/rccm.201004-  
19 651  
20 0549OC  
21 652  
22  
23 653 41 Festic E, Kor DJ, Gajic O. Prevention of acute respiratory distress syndrome. *Curr*  
24  
25 *Opin Crit Care* 2015;**21**:82–90. doi:10.1097/MCC.000000000000174  
26 654  
27  
28 655  
29  
30 656  
31  
32  
33  
34  
35  
36  
37  
38  
39  
40  
41  
42  
43  
44  
45  
46  
47  
48  
49  
50  
51  
52  
53  
54  
55  
56  
57  
58  
59  
60

1  
2  
3 657 **FIGURE LEGENDS**  
4

5 658 **Figure 1:** Flowchart of inclusion of PRoVENT-iMIC  
6

7 659 Abbreviations: MV, Mechanical Ventilation; LIPS, Lung Injury Prediction Score; ARDS,  
8  
9 Acute Respiratory Distress Syndrome.  
10  
11

12 661  
13

14 662 **Figure 2.** Sequence of data submission in the electronic case report form  
15

16 663 Abbreviations: LIPS, Lung Injury Prediction Score; MV, mechanical ventilation, ARDS,  
17  
18 Acute Respiratory Distress Syndrome; CPE, cardiogenic pulmonary oedema; ICU,  
19  
20 Intensive Care Unit.  
21  
22

23 666  
24

25 667  
26  
27  
28  
29  
30  
31  
32  
33  
34  
35  
36  
37  
38  
39  
40  
41  
42  
43  
44  
45  
46  
47  
48  
49  
50  
51  
52  
53  
54  
55  
56  
57  
58  
59  
60

668 **Table 1.** Lung Injury Prediction Score (LIPS) calculation worksheet<sup>17,34</sup>  
 669

| <b>Predisposing Conditions</b> | <b>Score</b> | <b>Risk Modifiers</b>               | <b>Score</b> |
|--------------------------------|--------------|-------------------------------------|--------------|
| Shock                          | 2            | Alcohol Abuse                       | 1            |
| Aspiration                     | 2            | BMI > 30 kg/m <sup>2</sup>          | 1            |
| Sepsis                         | 1            | Hypoalbuminemia                     | 1            |
| Pneumonia                      | 1.5          | Chemotherapy                        | 1            |
| <b>High-Risk Surgery</b>       |              | FiO <sub>2</sub> > 0.35 (> 4 l/min) | 2            |
| Orthopedic Spine               | 1            | RR > 30 bpm                         | 1.5          |
| Acute Abdomen                  | 2            | SpO <sub>2</sub> < 95%              | 1            |
| Cardiac                        | 2.5          | Acidosis (pH < 7.35)                | 1.5          |
| Aortic Vascular                | 3.5          | Diabetes Mellitus*                  | - 1          |
| Emergency surgery              | 1.5          |                                     |              |
| <b>High-Risk Trauma</b>        |              |                                     |              |
| Traumatic Brain Injury         | 2            |                                     |              |
| Smoke Inhalation               | 2            |                                     |              |
| Near-Drowning                  | 2            |                                     |              |
| Lung Contusion                 | 1.5          |                                     |              |
| Multiple Fractures             | 1.5          |                                     |              |

670 Abbreviations: BMI, body mass index; FiO<sub>2</sub>, fraction of inspired oxygen; RR, respiratory  
 671 rate; SpO<sub>2</sub>, pulse oximetry oxygen saturation.

672 \*(To consider only in septic patients)

673



674 **Table 2a. The Berlin definition of ARDS**

| Criteria                   | Definition                                                                                                                                                                               |                                            |                                      |
|----------------------------|------------------------------------------------------------------------------------------------------------------------------------------------------------------------------------------|--------------------------------------------|--------------------------------------|
| Time                       | Within one week of a known clinical insult, or new/worsening respiratory symptoms                                                                                                        |                                            |                                      |
| Chest imaging <sup>1</sup> | Bilateral opacities not fully explained by effusions, lobar/lung collapse or nodules                                                                                                     |                                            |                                      |
| Origin of oedema           | Respiratory failure not fully explained by cardiac failure or fluid overload; need objective assessment to exclude hydrostatic oedema if no risk factor present (e.g., echocardiography) |                                            |                                      |
| Oxygenation <sup>2</sup>   | Mild                                                                                                                                                                                     | Moderate                                   | Severe                               |
|                            | $200 < \text{PaO}_2/\text{FiO}_2 \leq 300$                                                                                                                                               | $100 < \text{PaO}_2/\text{FiO}_2 \leq 200$ | $\text{PaO}_2/\text{FiO}_2 \leq 100$ |
|                            | PEEP or CPAP <sup>3</sup> $\geq 5$ cm H <sub>2</sub> O                                                                                                                                   | PEEP $\geq 5$ cm H <sub>2</sub> O          | PEEP $\geq 5$ cm H <sub>2</sub> O    |

Abbreviations: ARDS, acute respiratory distress syndrome; PaO<sub>2</sub>, partial pressure of arterial oxygen; FiO<sub>2</sub>, fraction of inspired oxygen; PEEP, positive end-expiratory pressure; CPAP, continuous positive airway pressure.

<sup>1</sup>chest X-ray or CT scan; <sup>2</sup>if altitude higher than 1,000 meters, correction factor should be made as follows: PaO<sub>2</sub>/FiO<sub>2</sub> x (barometric pressure/760); <sup>3</sup>this may be delivered noninvasively in the mild acute respiratory distress syndrome

675  
676  
677 **Table 2b. Alternative Oxygenation criteria (if PaO<sub>2</sub> data unavailable)**  
678

| Criteria           | Mild ARDS                                  | Moderate ARDS                              | Severe ARDS                          |
|--------------------|--------------------------------------------|--------------------------------------------|--------------------------------------|
| <b>Oxygenation</b> | $235 < \text{SpO}_2/\text{FiO}_2 \leq 315$ | $150 < \text{SpO}_2/\text{FiO}_2 \leq 235$ | $\text{SpO}_2/\text{FiO}_2 \leq 150$ |
|                    | PEEP or CPAP $\geq 5$ cmH <sub>2</sub> O   | PEEP $\geq 5$ cmH <sub>2</sub> O           | PEEP $\geq 5$ cmH <sub>2</sub> O     |

679 Abbreviations: SpO<sub>2</sub>, pulse oximetry oxygen saturation; FiO<sub>2</sub>, fraction of inspired oxygen

680  
681

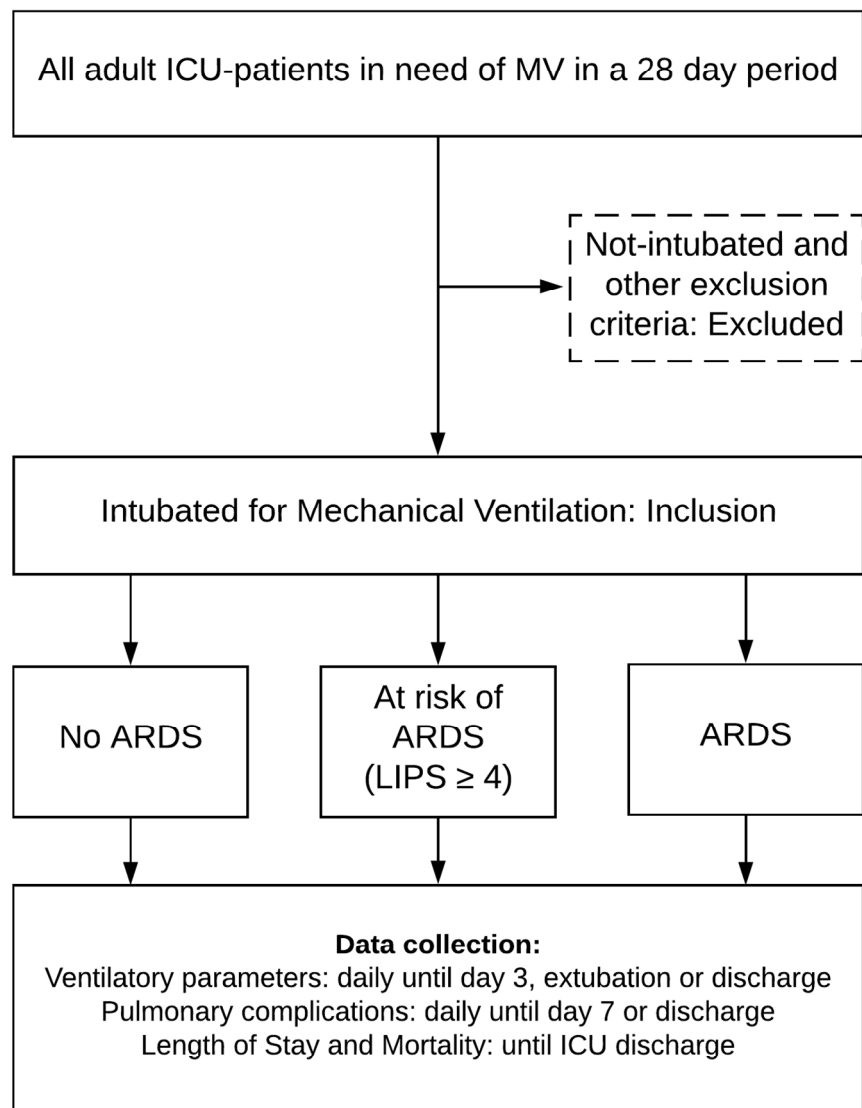

Figure 1. Flowchart of inclusion of PROVENT-iMIC<sup>†</sup>. Abbreviations: MV, Mechanical Ventilation; LIPS, Lung Injury Prediction Score; ARDS, Acute Respiratory Distress Syndrome.<sup>†</sup>

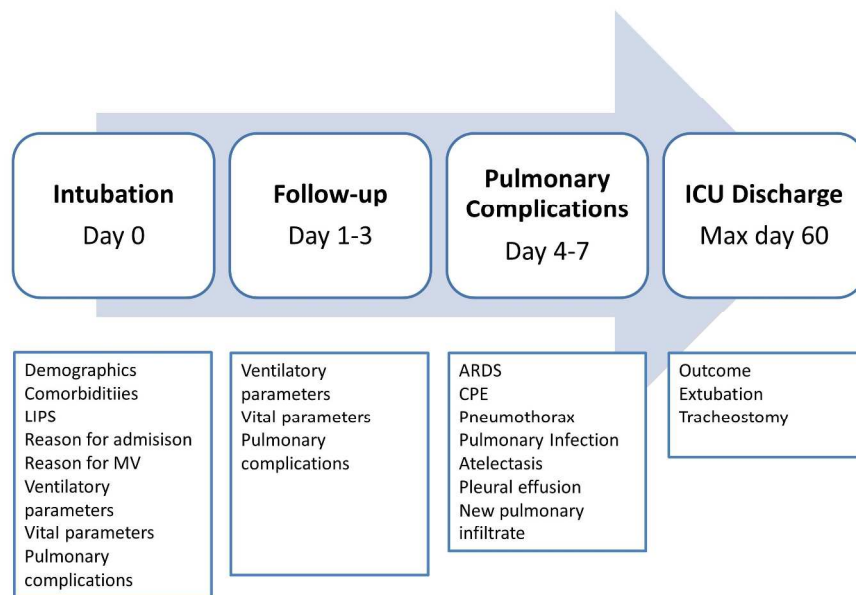

Figure 2. Sequence of data submission in the electronic case report form!! † . Abbreviations: LIPS, Lung Injury Prediction Score; MV, mechanical ventilation, ARDS, Acute Respiratory Distress Syndrome; CPE, cardiogenic pulmonary oedema; ICU, Intensive Care Unit. !! †

254x190mm (300 x 300 DPI)

# BMJ Open

## PRactice of VENTilation in Middle–Income Countries (PRoVENT–iMIC) – rationale and protocol for a prospective international multicentre observational study in intensive care units in Asia

|                               |                                                                                                                                                                                                                                                                                                                                                                                                                                                                                                                                                                                                                                                                                                                                                                                                                                                                                                                                                                                                                                                                                                                                                                                                                                                                                                                                                                                                                                                                                                                                                                                                                                                                                                                                                                                                                                                                                                                                                                                                                                                                                                                                                                                                                                                                                        |
|-------------------------------|----------------------------------------------------------------------------------------------------------------------------------------------------------------------------------------------------------------------------------------------------------------------------------------------------------------------------------------------------------------------------------------------------------------------------------------------------------------------------------------------------------------------------------------------------------------------------------------------------------------------------------------------------------------------------------------------------------------------------------------------------------------------------------------------------------------------------------------------------------------------------------------------------------------------------------------------------------------------------------------------------------------------------------------------------------------------------------------------------------------------------------------------------------------------------------------------------------------------------------------------------------------------------------------------------------------------------------------------------------------------------------------------------------------------------------------------------------------------------------------------------------------------------------------------------------------------------------------------------------------------------------------------------------------------------------------------------------------------------------------------------------------------------------------------------------------------------------------------------------------------------------------------------------------------------------------------------------------------------------------------------------------------------------------------------------------------------------------------------------------------------------------------------------------------------------------------------------------------------------------------------------------------------------------|
| Journal:                      | <i>BMJ Open</i>                                                                                                                                                                                                                                                                                                                                                                                                                                                                                                                                                                                                                                                                                                                                                                                                                                                                                                                                                                                                                                                                                                                                                                                                                                                                                                                                                                                                                                                                                                                                                                                                                                                                                                                                                                                                                                                                                                                                                                                                                                                                                                                                                                                                                                                                        |
| Manuscript ID                 | bmjopen-2017-020841.R2                                                                                                                                                                                                                                                                                                                                                                                                                                                                                                                                                                                                                                                                                                                                                                                                                                                                                                                                                                                                                                                                                                                                                                                                                                                                                                                                                                                                                                                                                                                                                                                                                                                                                                                                                                                                                                                                                                                                                                                                                                                                                                                                                                                                                                                                 |
| Article Type:                 | Protocol                                                                                                                                                                                                                                                                                                                                                                                                                                                                                                                                                                                                                                                                                                                                                                                                                                                                                                                                                                                                                                                                                                                                                                                                                                                                                                                                                                                                                                                                                                                                                                                                                                                                                                                                                                                                                                                                                                                                                                                                                                                                                                                                                                                                                                                                               |
| Date Submitted by the Author: | 19-Mar-2018                                                                                                                                                                                                                                                                                                                                                                                                                                                                                                                                                                                                                                                                                                                                                                                                                                                                                                                                                                                                                                                                                                                                                                                                                                                                                                                                                                                                                                                                                                                                                                                                                                                                                                                                                                                                                                                                                                                                                                                                                                                                                                                                                                                                                                                                            |
| Complete List of Authors:     | <p>Pisani, Luigi; Mahidol Oxford Tropical Medicine Research Unit; AMC, Department of Intensive Care<br/>         Algera, Anna; AMC, Department of Intensive Care<br/>         Serpa Neto, Ary; Hospital Israelita Albert Einstein, Department of Intensive Care Medicine<br/>         Ahsan, Areef ; Bangladesh Institute of Research and Rehabilitation in Diabetes Endocrines and Metabolic Disorders, Department of Critical Care<br/>         Beane, Abi; Network for Improving Critical Care Systems and Training; Mahidol Oxford Tropical Medicine Research Unit<br/>         Chittawatanarat, Kaweesak ; Chiang Mai University, Department of Surgery<br/>         Faiz, Abul; Mahidol Oxford Tropical Medicine Research Unit; Dev Care Foundation<br/>         Haniffa, Rashan; National Intensive Care Surveillance, NICS<br/>         Hashemian, Reza; Shaheed Beheshti University of Medical Sciences, National Research Institute of Tuberculosis and Lung Diseases<br/>         Hashmi, Madiha; Aga Khan University, Department of Anaesthesiology<br/>         Imad, Hisham; Mahidol University Faculty of Tropical Medicine, Department of Clinical Tropical Medicine<br/>         Indraratna, Kanishka; Sri Jayewardenepura General Hospital, Department of Intensive Care<br/>         Iyer, Shivakumar ; Bharati Vidyapeeth University Medical College and Hospital, Department of Medicine<br/>         Kayastha, Gyan; Patan Academy of Health Sciences, Department of Internal Medicine<br/>         Krishna, Bhuvana ; St John's Medical College, Department of Critical Care Medicine<br/>         Moosa, Hassan; Indira Gandhi Memorial Hospital, Department of Intensive Care<br/>         Nadjm, Behzad; National Hospital for Tropical Diseases, Oxford University Clinical Research Unit<br/>         Pattnaik, Rajyabardhan; Ispat General Hospital, Critical Care Unit<br/>         Sampath, Sriram; St John's Medical College, Department of Critical Care Medicine<br/>         Thwaites, Louise; Oxford University Clinical Research Unit, Hospital for Tropical Diseases<br/>         Tun, Ni Ni; Medical Action Myanmar<br/>         Yunos, Nor'Azim; Monash University - Malaysia Campus, Jeffrey Cheah School of Medicine and Health Sciences</p> |

|                                    |                                                                                                                                                                                                                                                                                                                                                                                                                                                                                                                                                                                                                                                                                                                                         |
|------------------------------------|-----------------------------------------------------------------------------------------------------------------------------------------------------------------------------------------------------------------------------------------------------------------------------------------------------------------------------------------------------------------------------------------------------------------------------------------------------------------------------------------------------------------------------------------------------------------------------------------------------------------------------------------------------------------------------------------------------------------------------------------|
|                                    | Grasso, Salvatore; Università degli Studi di Bari Dipartimento Emergenza e Trapianti di Organi, Intensive Care Unit<br>Paulus, Frederique; AMC, Department of Intensive Care<br>De Abreu, Marcelo Gama; University Hospital Carl Gustav Carus, and Technische Universität Dresden, 18Pulmonary Engineering Group, Department of Anesthesiology and Intensive Care Medicine<br>Pelosi, Paolo; IRCCS Azienda Ospedaliera Universitaria San Martino - IST Istituto Nazionale per la Ricerca sul Cancro, Department of Surgical Sciences and Integrated Diagnostics<br>Dondorp, Arjen; Mahidol Oxford Tropical Medicine Research Unit<br>Schultz, Marcus; AMC, Department of Intensive Care; Mahidol Oxford Tropical Medicine Research Unit |
| <b>Primary Subject Heading</b> :   | Intensive care                                                                                                                                                                                                                                                                                                                                                                                                                                                                                                                                                                                                                                                                                                                          |
| <b>Secondary Subject Heading</b> : | Epidemiology, Global health, Respiratory medicine                                                                                                                                                                                                                                                                                                                                                                                                                                                                                                                                                                                                                                                                                       |
| <b>Keywords</b> :                  | mechanical ventilation, invasive ventilation, ARDS, outcomes, middle-income countries, resource-limited settings                                                                                                                                                                                                                                                                                                                                                                                                                                                                                                                                                                                                                        |
|                                    |                                                                                                                                                                                                                                                                                                                                                                                                                                                                                                                                                                                                                                                                                                                                         |

SCHOLARONE™  
Manuscripts

review only

# PRactice of VENTilation in Middle–Income Countries (PRoVENT–iMIC) – rationale and protocol for a prospective international multicentre observational study in Intensive Care Units in Asia

Luigi Pisani,<sup>1,21</sup> Anna Geke Algera,<sup>1</sup> Ary Serpa Neto,<sup>1,3</sup> Areef Ahsan,<sup>4</sup> Abigail Beane,<sup>21</sup> Kaweesak Chittawatanarat,<sup>5</sup> Abul Faiz,<sup>6,21</sup> Rashan Haniffa,<sup>21</sup> Reza Hashemian,<sup>7</sup> Madiha Hashmi,<sup>8</sup> Hisham Ahmed Imad,<sup>9</sup> Kanishka Indraratna,<sup>10</sup> Shivakumar Iyer,<sup>11</sup> Gyan Kayastha,<sup>12</sup> Bhuvana Krishna,<sup>13</sup> Hassan Moosa,<sup>14</sup> Behzad Nadjm,<sup>20</sup> Rajyabardhan Pattnaik,<sup>15</sup> Sriram Sampath,<sup>13</sup> Louise Thwaites,<sup>16</sup> Ni Ni Tun,<sup>17</sup> Nor'azim Mohd Yunos,<sup>18</sup> Salvatore Grasso,<sup>19</sup> Frederique Paulus,<sup>1</sup> Marcelo Gama de Abreu,<sup>18</sup> Paolo Pelosi,<sup>19</sup> Arjen M. Dondorp,<sup>1,21</sup> and Marcus J. Schultz,<sup>1,2,21</sup>  
for the PRoVENT–iMIC investigators, MORU\* and the PROVE network\*\*

## **Academic Medical Center, Amsterdam, The Netherlands:**

<sup>1</sup>Department of Intensive Care

<sup>2</sup>Laboratory of Experimental Intensive Care and Anesthesiology (L·E·I·C·A)

## **Hospital Israelita Albert Einstein, São Paulo, Brazil:**

<sup>3</sup>Department of Intensive Care Medicine

## **BIRDEM General Hospital, Dhaka, Bangladesh:**

<sup>4</sup>Department of Critical Care

## **Chiang Mai University, Chiang Mai, Thailand:**

<sup>5</sup>Department of Surgery

## **Dev Care Foundation, Bangladesh**

## **Shahid Beheshti University of Medical Sciences, Tehran, Iran:**

<sup>7</sup>National Research Institute of Tuberculosis and Lung Diseases

## **Aga Khan University, Karachi, Pakistan:**

<sup>8</sup>Department of Anesthesiology

## **Faculty of Tropical Medicine, Mahidol University, Bangkok, Thailand:**

<sup>9</sup>Department of Clinical Tropical Medicine

## **Indira Gandhi Memorial Hospital, Malé, Maldives:**

<sup>14</sup> Department of Intensive Care

1  
2  
3 **Sri Jayewardenepura General Hospital, Nugegoda, Sri Lanka:**

4 <sup>10</sup>Department of Anesthesia and Intensive Care

5 **Bharati Vidyapeeth Medical College, Pune, India:**

6 <sup>11</sup>Department of Medicine

7 **Patan Academy of Health Science, Kathmandu, Nepal:**

8 <sup>12</sup>Department of Internal Medicine

9 **St. John's Medical College, Bangalore, India:**

10 <sup>13</sup>Department of Critical Care Medicine

11 **Ispat General Hospital, Rourkela, India:**

12 <sup>15</sup>Critical Care Unit

13 **Oxford University Clinical Research Unit, Ho Chi Minh City, Vietnam**

14 <sup>16</sup>Hospital for Tropical Diseases

15 **Medical Action Myanmar, Naypyidaw Myanmar:**

16 **Monash University Malaysia, Johor, Malaysia:**

17 <sup>18</sup>Jeffrey Cheah School of Medicine and Health Sciences

18 **University of Bari, Bari, Italy:**

19 <sup>19</sup>Department of Emergency and Organ Transplantation (DETO)

20 **University Hospital Carl Gustav Carus, and Technische Universität Dresden,**

21 **Dresden, Germany:**

22 <sup>18</sup>Pulmonary Engineering Group, Department of Anesthesiology and Intensive Care  
Medicine

23 **San Martino Policlinico Hospital - IRCCS for Oncology, University of Genoa,**

24 **Genoa, Italy:**

25 <sup>19</sup>Department of Surgical Sciences and Integrated Diagnostics

26 **National Hospital for Tropical Diseases, Hanoi, Vietnam**

27 <sup>20</sup>Oxford University Clinical Research Unit

28 **Faculty of Tropical Medicine, Mahidol University, Bangkok, Thailand:**

29 <sup>21</sup>Mahidol–Oxford Tropical Medicine Research Unit (MORU)

30 \*MORU, the Mahidol Oxford Tropical Medicine Research Unit, Bangkok, Thailand

31 ([www.tropmedres.ac](http://www.tropmedres.ac))

32 \*\*PROVE Network, the Protective Ventilation Network ([www.provenet.eu](http://www.provenet.eu))

33 Word count manuscript: 3974 words (abstract: 300 words)

34 Number of inserts: 2 tables and 2 figures

35 **Correspondence:**

36 Luigi Pisani, study coordinator

37 Mahidol–Oxford Tropical Medicine Research Unit (MORU)

38 Faculty of Tropical Medicine, Mahidol University

39 3rd Floor, 60th Anniversary Chalermprikiat Building

40 420/6 Rajvithi Road, Bangkok 10400, Thailand

41 E-mail: [luigipisani@gmail.com](mailto:luigipisani@gmail.com)

1  
2  
3 **77 ABSTRACT**  
4

5 **78 *Introduction***  
6

7  
8 **79** Current evidence on epidemiology and outcomes of invasively mechanically ventilated  
9  
10 **80** intensive care unit (ICU) patients is predominantly gathered in resource-rich settings.  
11  
12 **81** Patient case-mixes and patterns of critical illnesses, and probably also ventilation  
13  
14 **82** practices are likely to be different in resource-limited settings. We aim to investigate the  
15  
16 **83** epidemiological characteristics, ventilation practices and clinical outcomes of patients  
17  
18 **84** receiving mechanical ventilation in ICUs in Asia.  
19

20  
21 **85 *Methods and analysis***  
22

23  
24 **86** PRoVENT-iMIC (study of PRactice of VENTilation in Middle Income Countries) is an  
25  
26 **87** international multicentre observational study to be undertaken in approximately 60 ICUs  
27  
28 **88** in 11 Asian countries. Consecutive patients aged 18 years or older who are receiving  
29  
30 **89** invasive ventilation in participating ICUs during a predefined 28-day period are to be  
31  
32 **90** enrolled, with a daily follow-up of 7 days. The primary outcome is ventilatory  
33  
34 **91** management (including tidal volume [ $V_T$ ] expressed as mL/kg predicted bodyweight  
35  
36 **92** [PBW], and positive end-expiratory pressure [PEEP] expressed as cm H<sub>2</sub>O) during the  
37  
38 **93** first three days of mechanical ventilation – compared between patients at no risk for  
39  
40 **94** ARDS, patients at risk for ARDS and in patients with ARDS (in case the diagnosis of  
41  
42 **95** ARDS can be made on admission). Secondary outcomes include occurrence of  
43  
44 **96** pulmonary complications and all-cause ICU mortality. The PRoVENT-iMIC study is  
45  
46 **97** registered at ClinicalTrials.gov, NCT 03188770.  
47  
48

49  
50  
51 **98 *Ethics and dissemination***  
52

53  
54 **99** PRoVENT-iMIC will be the first international study that prospectively assesses  
55  
56 **100** ventilation practices, outcomes and epidemiology of invasively ventilated patients in  
57



1  
2  
3 101 ICUs in Asia. The results of this large study, to be disseminated through conference  
4  
5 102 presentations and publications in international peer-reviewed journals, are of ultimate  
6  
7 103 importance when designing trials of invasive ventilation in resource-limited ICUs.  
8  
9  
10 104 Access to source data will be made available through national or international  
11  
12 105 anonymized datasets upon request and after agreement of the PRoVENT-iMIC steering  
13  
14 106 committee.

15  
16  
17 107 **KEYWORDS:** mechanical ventilation; invasive ventilation; ARDS; outcomes; middle-  
18  
19 108 income countries; resource-limited settings.

20  
21 109 **TRIAL REGISTRATION:** PRoVENT-iMIC is registered at [www.clinicaltrials.gov](http://www.clinicaltrials.gov) with trial  
22  
23 110 identification number NCT 03188770.

24  
25  
26 111

#### 27 28 112 **STRENGTHS AND LIMITATIONS OF THIS STUDY:**

- 29  
30  
31 113 • PRoVENT-iMIC is an international multicentre observational study with a wide  
32  
33 114 representation of Asian countries, allowing inferences on epidemiology,  
34  
35 115 management and outcomes of mechanical ventilation across the entire  
36  
37 116 subcontinent.
- 38  
39 117 • The attention on ventilation practice will provide robust data on this specific  
40  
41 118 domain while the 7 days follow-up will allow precise recording of pulmonary  
42  
43 119 complications at their origin.
- 44  
45 120 • The study will have a sample size large enough to obtain precise estimates of  
46  
47 121 pulmonary complications and ICU mortality and to examine potential associations  
48  
49 122 between ventilation practice and these outcomes.
- 50  
51 123 • One limitation is the potential constraint of laboratory data, generating a limited  
52  
53 124 dataset not comprising daily severity scores useful for statistical controlling  
54  
55 125 purposes.
- 56  
57  
58  
59  
60

- 1  
2  
3 126 • The conceivable limitation in blood gas analysis and imaging examinations may  
4  
5 127 limit the documentation of insurgence or worsening of ARDS and other pulmonary  
6  
7 128 complications.  
8

9 129  
10  
11  
12  
13  
14  
15  
16  
17  
18  
19  
20  
21  
22  
23  
24  
25  
26  
27  
28  
29  
30  
31  
32  
33  
34  
35  
36  
37  
38  
39  
40  
41  
42  
43  
44  
45  
46  
47  
48  
49  
50  
51  
52  
53  
54  
55  
56  
57  
58  
59  
60

For peer review only

## 130 INTRODUCTION

131 Invasive mechanical ventilation is a frequently applied intervention in patients in  
132 intensive care units (ICUs) and a mandatory strategy in patients under general  
133 anaesthesia for surgery. There is increased understanding how invasive ventilation can  
134 harm the lungs, in ICU patients with the acute respiratory distress syndrome (ARDS) [1],  
135 as well as in ICU patients with less injured or uninjured lungs, and in surgery patients  
136 who usually have healthy lungs [2]. A central cause is that invasive ventilation with  
137 positive pressure may overdistend one lung area while failing to recruit another,  
138 compromising gas exchange but also, and more importantly, increasing or inducing  
139 pulmonary injury. There is convincing evidence that this harm can be partly prevented by  
140 adjusting volume and pressure settings on the ventilator. Indeed, use of low tidal  
141 volumes ( $V_T$ ) [3–5], to prevent overdistension, and sufficient positive end–expiratory  
142 pressure (PEEP) [3,5,6], to prevent alveolar collapse or atelectrauma, have both been  
143 found to improve outcomes of various types of patients, and their use is increasingly  
144 recommended [7–9]. Furthermore, the driving pressure seems to be another key  
145 variable in the development of injury caused by mechanical ventilation, as a large  
146 individual patient data metaanalysis showed a clear and consistent association between  
147 driving pressure and mortality [10].

148 Practice of invasive ventilation has evolved over time, with a more extensive use of  
149 ventilator settings that are proven to prevent against so–called ventilator–induced lung  
150 injury. The recent LUNG SAFE (‘Large observational study to UNderstand the Global  
151 impact of Severe Acute respiratory Failure’) showed that by now up to two in every three  
152 patients with ARDS receive so–called lung–protective ventilation[11]. Results of  
153 PRoVENT (‘PRactice of VENTilation in critically ill patients without ARDS at onset of

1  
2  
3 154 ventilation study') are in line with those from LUNG SAFE, showing that one in every two  
4  
5 155 ICU patients without ARDS receive ventilation with lung-protective settings[12]. Results  
6  
7 156 of LAS VEGAS ('Local ASsessment of VEntilatory management during General  
8  
9 Anaesthesia for Surgery study') even suggests increased use of lung-protective  
10  
11 157 ventilation in the operating rooms [13]. It should be noticed, though, that LUNG SAFE,  
12  
13 158 PRoVENT, and LAS VEGAS were mainly performed in high-income countries, and  
14  
15 159 exclusively recruiting patients in resource-rich centres, which limits the generalizability  
16  
17 160 of their results to lower-income countries and resource-limited settings. Historical  
18  
19 161 descriptions of cohorts of invasively ventilated patients in resource-poor settings have  
20  
21 162 been published, but these were all small in size, and while suggesting the existence of  
22  
23 163 ventilator-related deaths they largely failed to report key ventilator parameters [14-16].  
24  
25 164 Continued use of high  $V_T$  has been reported in a recent Brazilian study [17], while a  
26  
27 165 study from India suggests a change towards the use of lower  $V_T$  [18].  
28  
29  
30  
31  
32

33 167 There are several reasons to consider important differences with regard to  
34  
35 168 practice of ventilation between resource-rich and resource-limited settings. The  
36  
37 169 disparity in resources may limit the availability as well as the safety of certain ventilator  
38  
39 170 settings [19]. Awareness of the impact of invasive ventilation on lung tissue, and the  
40  
41 171 benefit of using lung-protective ventilation settings could be severely limited [20].  $V_T$  and  
42  
43 172 PEEP may be poorly titrated due to insufficient staffing, and due to the absence of  
44  
45 173 arterial blood gas monitoring, pulse oximetry or capnography [21]. Other reasons not to  
46  
47 174 implement use of low  $V_T$  and sufficient levels of PEEP include alleged side effects  
48  
49 175 associated with their use, like the need for higher respiratory rates, increased sedation  
50  
51 176 requirements, and even the promotion of patient-ventilator asynchrony. As invasive  
52  
53 177 ventilation with higher PEEP may cause hemodynamic instability, limited access to fluids  
54  
55  
56  
57  
58  
59  
60

1  
2  
3 178 and vasoactive drugs may hamper its use. Finally, as resource-poor ICUs are usually  
4  
5 179 situated in tropical countries their case-mix and indications for invasive ventilation are  
6  
7  
8 180 strikingly different [18].  
9

10 181 To gain a better insight into the ventilation practice, outcomes and  
11  
12 182 epidemiological characteristics of ICU patients receiving invasive ventilation in resource-  
13  
14 183 limited settings, we plan to perform the PRoVENT-iMIC ('Practice of VENTilation in  
15  
16  
17 184 Middle-Income Countries study'), a prospective observational cohort study in ICUs in  
18  
19 185 Asia. We also aim to describe the association between certain ventilator settings and  
20  
21  
22 186 patient-centred outcomes. We hypothesize that practice of ventilation is highly variable,  
23  
24 187 in particular with respect to  $V_T$  and PEEP settings. This understanding is fundamental to  
25  
26 188 planning any intervention study in these countries in the future.  
27

28  
29 189  
30  
31  
32  
33  
34  
35  
36  
37  
38  
39  
40  
41  
42  
43  
44  
45  
46  
47  
48  
49  
50  
51  
52  
53  
54  
55  
56  
57  
58  
59  
60

## 190 **METHODS and ANALYSIS**

### 191 *Design and Setting*

192 PRoVENT-iMIC is an international multicentre observational study in consecutive ICU  
193 patients receiving invasive mechanical ventilation during a 28-day period, expected to  
194 run in approximately 60 centres in the following Asian countries: Thailand, Vietnam,  
195 Myanmar, Pakistan, Nepal, Bangladesh, Malaysia, Sri Lanka, Maldives, Iran and India.  
196 These countries belong to the low or middle-income economies, as classified by the  
197 World Bank [22]. PRoVENT-iMIC is conducted in accordance with the declaration of  
198 Helsinki and is registered at [www.clinicaltrials.gov](http://www.clinicaltrials.gov) (trial identification number NCT  
199 03188770). Figure 1 shows the study flow-chart.

### 200 *Study population*

201 Consecutive patients intubated for ventilation during a predefined period of 28 days are  
202 enrolled. Inclusion is not restricted to patients who are intubated in the ICU, as also  
203 patients who started invasive ventilation in the emergency room, normal ward,  
204 community, or operating room directly preceding the present ICU admission are eligible  
205 for participation, without any minimum or maximum hours of ventilation needed for  
206 inclusion. The exclusion criteria include age < 18 years, use of non-invasive ventilation  
207 not followed by invasive ventilation, patients whose invasive mechanical ventilation  
208 started before the 28-day period of inclusion, and patients transferred from another  
209 hospital under invasive ventilation.

210 Patients will be stratified in three groups for comparison of the primary and  
211 secondary endpoints: patients without ARDS, patients without but at risk for  
212 development of ARDS, according to the Lung Injury Prediction Score (LIPS, Table 1)  
213 [23], and patients with ARDS, according to the Berlin Definition [24]. Patients with ARDS

1  
2  
3 214 will also be stratified according to severity of ARDS, based on the oxygenation (mild,  
4  
5 215 moderate and severe ARDS categories).

6  
7  
8 216 *Study conduct*

9  
10 217 Local investigators will screen all patients who start invasive ventilation in one of the  
11  
12 218 participating ICUs during a predefined period of 28-day, lasting from 8:00 AM on the  
13  
14 219 Monday of the first week to 7.59 AM on the Monday four weeks later. The exact starting  
15  
16 220 date will be flexible for participating centres and shall be determined by the national  
17  
18 221 study coordinator. Data collection has started in November 2017 in some sites; all sites  
19  
20 222 are expected to initiate the service evaluation within one year after the overall start.

21  
22  
23  
24 223 *Data to be collected*

25  
26 224 Baseline and demographic variables will be collected on the day of admission, including  
27  
28 225 gender, age, actual or estimated weight and height, smoking status, comorbidities  
29  
30 226 including chronic obstructive pulmonary disease (COPD), active cancer, heart failure,  
31  
32 227 diabetes mellitus, chronic kidney failure, liver cirrhosis and arterial hypertension, the  
33  
34 228 presence of ARDS according to the Berlin Definition, the LIPS, reason for ICU  
35  
36 229 admission. On the day of start of invasive ventilation we will document the reason for  
37  
38 230 starting mechanical ventilation, and whether the patient received non-invasive ventilation  
39  
40 231 before intubation.

41  
42  
43  
44 232 Every day, until day 3 from admission in the ICU, until ICU discharge or death,  
45  
46 233 whichever comes first, the ventilation status and ventilation characteristics will be  
47  
48 234 collected, including ventilation mode,  $V_T$  size, respiratory rate (set and measured), peak  
49  
50 235 and plateau pressure, PEEP, inspired oxygen fraction, peripheral oxygen saturation,  
51  
52 236 blood gas analysis data when available ( $PaO_2$ ,  $PaCO_2$ , arterial bicarbonate, arterial pH),  
53  
54  
55  
56  
57  
58  
59  
60

1  
2  
3 237 end-tidal CO<sub>2</sub>, when available and hemodynamic parameters like heart rate and systolic  
4  
5 238 blood pressure.

6  
7 239 Every day, until day 7, ICU discharge or death, whichever comes first, the  
8  
9 240 occurrence of pulmonary complications will be scored, including new requirement of  
10  
11 241 invasive ventilation after initial extubation, pulmonary infections, atelectasis,  
12  
13 242 pneumothorax, pleural effusions, new pulmonary infiltrates and development or  
14  
15 243 worsening of ARDS.

16  
17 244 On the day of ICU discharge (maximum 60 days after recruitment) outcome will  
18  
19 245 be recorded as follows: death, discharge to ward, to medium care or high dependency  
20  
21 246 unit, discharge to home for palliative care, or transfer to another ICU. The date of  
22  
23 247 extubation, reintubation and tracheostomy (if performed) will also be recorded in this  
24  
25 248 moment.

### 26 249 *Study endpoints*

27  
28 250 The primary endpoint is V<sub>T</sub>-size in millilitres per kilogram of predicted body weight  
29  
30 251 (ml/kg PBW) and PEEP in centimetres of water (cm H<sub>2</sub>O) used amongst diverse ICU  
31  
32 252 patient categories during the first three days of mechanical ventilation. Secondary  
33  
34 253 clinical endpoints include other ventilation parameters (including respiratory system  
35  
36 254 driving pressure, the proportion of patients at risk of ARDS as stratified by the LIPS, or  
37  
38 255 ARDS defined by the Berlin Definition, the occurrence of pulmonary complications,  
39  
40 256 length of stay in ICU, duration of invasive ventilation and all-cause ICU-mortality.

### 41 257 *Definitions*

42  
43 258 All cause ICU-mortality is defined as any death in the ICU. ICU length of stay is defined  
44  
45 259 as the time between ICU admission and ICU discharge or death in ICU. The number of  
46  
47 260 days of ventilation is defined as time between endotracheal intubation and successful  
48  
49  
50  
51  
52  
53  
54  
55  
56  
57  
58  
59  
60



1  
2  
3 261 extubation (in case of intermittent mechanical ventilation via a tracheostomy, every day  
4  
5 262 a patient needs ventilation counts as one extra day, irrespective of the duration of  
6  
7 263 ventilation on that specific day). In case of non-invasive ventilation, the duration will be  
8  
9  
10 264 assessed separated from the assessment of invasive ventilation. The presence of  
11  
12 265 spontaneous activity will be identified by any recorded difference between the set and  
13  
14 266 measured respiratory rate.

15  
16  
17 267 Driving pressure will be calculated by subtracting the level of PEEP from the  
18  
19 268 plateau pressure (Pplat in volume-control ventilation) or maximal airway pressure  
20  
21 269 (Pmax in pressure-control ventilation). Pplat and Pmax are considered reliable for this  
22  
23  
24 270 calculation if the patient is receiving complete ventilatory assistance without evidence of  
25  
26 271 spontaneous activity, i.e., only when the set respiratory rate equals the measured  
27  
28 272 respiratory rate. Peak airways pressures will not be used to compute driving pressure as  
29  
30  
31 273 these represent a poor surrogate of the plateau pressure. Only pulmonary complications  
32  
33 274 that occur after the first 24 hours of invasive ventilation will be considered in analysis, as  
34  
35 275 events preceding this time point may very well be considered the potential reason for  
36  
37 276 intubation. A pulmonary infection requires the presence of new or changed lung  
38  
39  
40 277 opacities on chest radiography and/or new or changed sputum plus at least a  
41  
42 278 temperature  $> 38.3$  °C or a white blood cell count  $>12,000$  per microliter of blood.  
43  
44 279 Atelectasis require the presence of increased density (lung opacity) on one or more  
45  
46 280 chest radiographs with displacement of the fissures toward the area of atelectasis,  
47  
48 281 crowding of pulmonary vessels and bronchi in the atelectatic region, upward  
49  
50 282 displacement of hemidiaphragm ipsilateral to the side of atelectasis, that may be  
51  
52  
53 283 accompanied by shift of the mediastinum or hilum towards the affected area and  
54  
55 284 compensatory overinflation in the unaffected lung [25]. Pleural effusion is suggested by

1  
2  
3 285 lung opacification with shift of the mediastinum, hilum or hemi-diaphragm towards the  
4  
5 286 non-affected area. Pneumothorax requires the presence of air in the pleural space with  
6  
7 287 no vascular bed surrounding the visceral pleura. ARDS is defined according to the Berlin  
8  
9 288 Definition [24] with alternative oxygenation criteria based on  $SpO_2/FiO_2$  applicable only  
10  
11 289 when blood gas analysis data is unavailable (Table 2a and 2b) [26,27]. Worsening of  
12  
13 290 ARDS is defined as any change in the prior classification (i.e., from mild to moderate or  
14  
15 291 severe ARDS, or from moderate to severe ARDS).

### 19 292 *Data management*

21 293 Data will be collected from a paper medical chart, or an electronic patient data  
22  
23 294 management system if available. Local investigators transcribe the collected data  
24  
25 295 directly onto an anonymized internet-based electronic CRF (REDCap – Research  
26  
27 296 Electronic Data Capture [28], [www.projectredcap.org](http://www.projectredcap.org)). In some centres data may be  
28  
29 297 recorded on paper CRF and successively transcribed on the electronic CRF at a later  
30  
31 298 time point. Access to the data-entry system is protected by a personalized username  
32  
33 299 and password. The data will be kept on a central secured server located at the Hospital  
34  
35 300 Israelita Albert Einstein, Sao Paulo, Brazil. The structure of the electronic CRF is  
36  
37 301 detailed in Figure 2. A screening-log with limited patient data will be completed with all  
38  
39 302 the included and excluded patients during the enrolment window. Participating centres  
40  
41 303 are instructed to enter data for the daily follow-up using values obtained as close as  
42  
43 304 possible to 08:00 AM, but only when the patient is stable at that time point. The study  
44  
45 305 day for the recording of pulmonary complications will be defined as the natural 24h  
46  
47 306 period from 00:00 until 23:59, to ensure that data is captured only once. Data for ICU-  
48  
49 307 discharge will be collected until a maximum of 60 days after ICU admission, after which  
50  
51 308 the CRF for that patient will be closed.

1  
2  
3 309 *Study sites*  
4

5 310 PRoVENT-iMIC will be conducted in 11 Asian countries, with a varying number of ICUs  
6  
7 311 per country. Participating ICUs are selected on the basis of willingness to participate.  
8  
9 312 There are no a priori established requirements for participation, and private as well as  
10  
11 313 public centres are eligible to represent real-life practices. A one-time web-based pre-  
12  
13 314 study survey on structure, organizational aspects and delivery of care in the participating  
14  
15 315 centres will be performed. Each participating centre is surveyed once regarding the  
16  
17 316 following information: hospital characteristics (private vs. public), ICU characteristics  
18  
19 317 (medical vs. surgical vs. mixed, and open vs. closed, number of ICU beds, annual  
20  
21 318 number of patient admitted, number of ventilators available, and other organ support  
22  
23 319 measures), and staffing (nurse to patient ratio, physician to patient ratio, presence of  
24  
25 320 specialized medical staff, and overnight coverage).  
26  
27  
28  
29

30  
31 321 *Statistical Analysis Plan*  
32

33 322 No formal sample size calculation was performed, but we expect each centre to enrol 20  
34  
35 323 to 40 patients in the allocated time period, yielding a total of 1,200 to 2,400 patients. We  
36  
37 324 consider this figure sufficient to analyse the study endpoints.  
38  
39

40 325 Normally distributed variables will be expressed by their mean and standard  
41  
42 326 deviation; not normally distributed variables will be expressed by their medians and  
43  
44 327 interquartile ranges; categorical variables will be expressed as n (%). In test groups of  
45  
46 328 continuous normally distributed variables, Student's t-test will be used. Likewise if  
47  
48 329 continuous data are not normally distributed the Mann Whitney U test will be used.  
49  
50 330 Categorical variables will be compared with the Chi-square test or Fisher's exact test or  
51  
52 331 when appropriate as relative risks. Statistical uncertainty will be expressed by 95%  
53  
54 332 confidence levels.  
55  
56  
57  
58  
59  
60

1  
2  
3 333 The primary outcome ( $V_T$  size [ml/kg PBW] and PEEP [cm H<sub>2</sub>O] levels during the  
4  
5 334 first three days of mechanical ventilation) – will be analysed and compared between  
6  
7  
8 335 patients at no risk for ARDS, patients at risk for ARDS and in patients with ARDS (in  
9  
10 336 case the diagnosis of ARDS could be made on admission). If the data is normally  
11  
12 337 distributed, one way Analysis of Variance (ANOVA) or two-way ANOVA assessing the  
13  
14 338 time–interaction between groups and days of observation will be used. When not  
15  
16  
17 339 normally distributed the Kruskal–Wallis test or Friedman test assessing the time–  
18  
19 340 interaction between groups and days of observation will be used.

21 341 Univariate analysis will be performed to identify potential factors associated with  
22  
23 342 outcomes including, but not limited to, ventilator settings (in particular  $V_T$  and PEEP). A  
24  
25 343 multivariate logistic regression model will be used to determine which of those factors  
26  
27 344 are independent. A stepwise approach will be used to enter new terms into the model,  
28  
29 345 with a limit of  $P < 0.2$  to enter the terms. Time to event variables is analysed using Cox  
30  
31 346 regression and visualized by Kaplan–Meier.

35 347 Time–course variables (e.g. repeated measures of ventilator parameters, vital  
36  
37 348 signs, oxygenation parameters and others) are also analysed by linear mixed model.  
38  
39 349 The linear mixed models procedure expands the generalized linear model (GLM) so that  
40  
41 350 the data are permitted to exhibit correlated and non–constant variability.

44 351 Pre–specified subgroups in the analyses studying potential associations between  
45  
46 352 ventilator settings and outcome will be: (1) patients at low risk of ARDS vs. patients at  
47  
48 353 risk of ARDS; (2) patients without ARDS vs. patients with ARDS; (3) reason for ICU  
49  
50 354 admission; and (4) reason for start of invasive ventilation. Statistical analyses will be  
51  
52 355 conducted using R ([www.r-project.org](http://www.r-project.org)). A  $P$ –value of less than 0.05 will be considered  
53  
54 356 statistically significant.

1  
2  
3 357 *Study organization*  
4

5 358 The Steering Committee is composed of a selection of PROVE Network investigators  
6  
7 359 plus the national coordinators from each participating country. These investigators were  
8  
9  
10 360 involved in the design of PRoVENT–iMIC. National coordinators are responsible for  
11  
12 361 identifying and recruiting local participating centres. They assist and train the local  
13  
14 362 investigators and oversee the conduct of the study, including administrative  
15  
16 363 management, record keeping and data management. Local investigators in individual  
17  
18 364 participating centres will provide scientific and structural leadership, ensuring local  
19  
20 365 ethical and regulatory approvals are obtained before start of patient inclusion. National  
21  
22 366 Coordinators and Local Investigators are expected to guarantee the quality and security  
23  
24 367 of the data collected.  
25  
26  
27

28 368 Prior to start of the study, study teams in each centre will undergo a web–based  
29  
30 369 training session on how to capture data in the electronic CRF. All study team members  
31  
32 370 will be provided with a manual of operations with instructions on how to accurately fill the  
33  
34 371 forms and the screening log. Incomplete or incorrectly entered electronic CRFs will be  
35  
36 372 signalled to the local investigators by the national and international coordinator, for  
37  
38 373 further review of the missing or flagged data.  
39  
40  
41

42 374 *Patient and Public Involvement*  
43

44 375 Patients and public were not directly involved in any phase of this study.  
45  
46  
47  
48  
49  
50  
51  
52  
53  
54  
55  
56  
57  
58  
59  
60

1  
2  
3 376 **ETHICS AND DISSEMINATION**  
4

5 377 The Oxford Tropical Research Ethical Committee (OxTREC) at the University of Oxford,  
6  
7 378 United Kingdom, exempted the study from ethical review on the 9<sup>th</sup> of June 2017. Data  
8  
9  
10 379 management, monitoring and reporting of the study will be performed in accordance with  
11  
12 380 the International Conference on Harmonization – Good Clinical Practice guidelines.  
13

14 381 All participating centres will also submit the study protocol to the national or local  
15  
16 382 Institutional Review Board for ethical judgment, as applicable by the current regulations  
17  
18 383 in the country. Due to the strict observational design and anonymous collection of data,  
19  
20 384 informed consent may not be required in most countries. However, where informed  
21  
22 385 consent is required, this must be approved by the local ethical committee before the  
23  
24 386 start of inclusion.  
25  
26  
27

28 387 The study will be reported following the Strengthening the reporting of  
29  
30 388 Observational Studies in Epidemiology (STROBE) statement guidelines and checklists  
31  
32 389 [29]. The results of this study will be published in a peer-reviewed medical journal. After  
33  
34 390 publication of the primary results, on request the pooled dataset will be available for all  
35  
36 391 members of the PRoVENT–iMIC collaboration for secondary analysis, after judgment  
37  
38 392 and approval of scientific quality and validity of the proposed analysis by the Steering  
39  
40 393 Committee.  
41  
42  
43

44 394  
45  
46  
47  
48  
49  
50  
51  
52  
53  
54  
55  
56  
57  
58  
59  
60

1  
2  
3 395 **DISCUSSION**  
4

5 396 PRoVENT–iMIC is designed to characterize the epidemiology, ventilator management,  
6  
7 397 occurrence of pulmonary complications and outcomes in invasively ventilated patients in  
8  
9  
10 398 an estimated 60 ICUs in 11 Asian countries. The results of PRoVENT–iMIC will help to  
11  
12 399 understand current ventilation practice in South and Southeast Asia, particularly with  
13  
14 400 respect to variability in ventilator settings amongst patients without, at risk for or with  
15  
16 401 established ARDS. Results of this study will be used to plan future trials of ventilation in  
17  
18 402 ICU patients in these settings.  
19

20  
21 403 PRoVENT–iMIC has several strengths. First, its prospective design will allow a  
22  
23 404 higher accuracy of data capturing with regard to exposures, confounders and endpoints  
24  
25 405 compared to studies that used a retrospective design [30]. While a prospective design  
26  
27 406 may cause sources of bias or establish causal effects, it minimizes the chance of  
28  
29 407 residual confounding by unmeasured variables, a common limitation with a retrospective  
30  
31 408 design, as has frequently been used in mechanical ventilation epidemiological studies  
32  
33 409 [31–33]. We will have a sample size large enough to obtain precise estimates of  
34  
35 410 pulmonary complications and ICU mortality and to examine potential associations  
36  
37 411 between ventilation practice and patient outcomes. Second, the study sample is not  
38  
39 412 restricted to certain patient diagnostic categories. Third, the attention on ventilation  
40  
41 413 practice will provide robust data on this specific domain while the 7 days follow–up will  
42  
43 414 allow precise recording of pulmonary complications at their origin. And finally, the wide  
44  
45 415 representation of Asian countries will allow inferences on geo–economic differences in  
46  
47 416 epidemiology, management and outcomes of mechanical ventilation across the entire  
48  
49 417 subcontinent.  
50  
51  
52  
53  
54  
55  
56  
57  
58  
59  
60

1  
2  
3 418 The focus on South and Southeast Asia follows our scarce knowledge about  
4  
5 419 clinical practices and ventilation strategies used in critically ill patients in this and other  
6  
7 420 resource-limited settings [21]. The burden of critical illness in low- and middle-income  
8  
9 421 countries is higher than generally perceived and it is expected to increase with an aging  
10  
11 422 population [34]. Additionally, ICUs are increasingly being set up in the region, especially  
12  
13 423 in busy urban settings. A recent survey highlighted considerable variation in structure,  
14  
15 424 organization and critical care delivery in Asian ICUs, but did not shed light on ventilation  
16  
17 425 management and patient-centred ventilation-associated outcomes [35]. This  
18  
19 426 information, however, is crucial for future trials of ventilation in ICU patients in these  
20  
21 427 settings, as we need to know whether critically ill patients across Asia equally benefit  
22  
23 428 from lung-protective ventilation as those in Western countries. Additionally, for proper  
24  
25 429 power calculations, information with regard to potential primary endpoints, like the  
26  
27 430 incidence of development of ARDS, duration of ventilation or death, is highly needed.  
28  
29 431 PRoVENT-iMIC will be the first observational study that can provide this information for  
30  
31 432 settings in South Asia. Results restricted to individual settings could also be valuable for  
32  
33 433 local clinicians seeking to improve their local practice, training planning and identify local  
34  
35 434 priorities for quality improvement within their departments.  
36  
37  
38  
39  
40  
41

42 435 There is now strong evidence-based support for various ICU process-based  
43  
44 436 interventions such as lung protective ventilation[36], conservative fluid management  
45  
46 437 strategies[37] and weaning protocols [38]. While centre- or country-specific practices or  
47  
48 438 restrictions of resources are potential challenges that affect implementation of all these  
49  
50 439 interventions, we focus on the management of ventilation and especially on the  
51  
52 440 employment of lung-protective ventilation where feasibility may represent an issue  
53  
54 441 specific to resource-limited settings. Recent literature has underlined the potential role  
55  
56  
57  
58  
59  
60



1  
2  
3 442 of the driving pressure (the pressure amplitude during each artificial breath) and its  
4  
5 443 determinants in the development of ventilator-associated lung injury. Results from  
6  
7 444 PRoVENT-iMIC will provide further data to enable us to discriminate the effects of  $V_T$   
8  
9  
10 445 size, PEEP and driving pressure on outcomes in patients with, at risk of, or without  
11  
12 446 ARDS.

13  
14 447 PRoVENT-iMIC will provide important data regarding outcomes following  
15  
16 448 invasive ventilation, including a wide range of clinically important pulmonary  
17  
18 449 complications. Historical studies from low-resource settings documented mortality rates  
19  
20 450 to exceed 70% [14–16]. However more recent data from South America and India have  
21  
22 451 documented mortality rates of ~40%, similar to that in high-income countries[17,18].  
23  
24 452 This suggests that mortality in ventilated patients has the potential to improve in low-  
25  
26 453 resource settings [12,13,39]. Although many factors may influence mortality, several  
27  
28 454 underappreciated factors related to invasive ventilation may have contributed, including  
29  
30 455 reduced need for invasive ventilation per se, improvements in safety of invasive  
31  
32 456 ventilation and in liberation from invasive ventilation.

33  
34  
35  
36  
37 457 Our interest in patients at risk of ARDS follows a global recent shift in ARDS  
38  
39 458 research. It is now clear that ARDS is rarely present at the time of the initial healthcare  
40  
41 459 encounter, and typically develops during the hospital course, usually between days 2  
42  
43 460 and 5 in patients with predisposing conditions or risk factors [40]. Hence increasing  
44  
45 461 efforts are being directed toward early identification of patients at risk with a goal of  
46  
47 462 prevention and early treatment prior to the development of a fully established syndrome.  
48  
49 463 This is probably equally important in resource-limited settings where the predisposing  
50  
51 464 conditions and risk modifiers for ARDS may differ and limited escalation of therapy is  
52  
53 465 often the case. PRoVENT-iMIC will be the first study to evaluate prospectively the role  
54  
55  
56  
57  
58  
59  
60

1  
2  
3 466 of LIPS in these settings. Although the poor predictive accuracy of the LIPS does not  
4  
5 467 currently support its use in everyday clinical practice [41], it has enabled enrolment in  
6  
7 468 clinical trials of ARDS prevention [23] and may yield an initial idea on the patients at risk  
8  
9  
10 469 of and disease progression in the Asian settings under study.

11  
12 470 PRoVENT-iMIC has some noticeable shortcomings. The definition of 'middle-  
13  
14 471 income' country is rather artificial as the level of health expenditure, local resources and  
15  
16 472 other geo-cultural factors might affect the processes of care in a larger extent than  
17  
18 473 national income classification. Despite the inclusion of ICUs from 11 countries, which  
19  
20 474 improves study generalizability, caution is needed when applying the results to  
21  
22 475 supposedly similar settings, as substantial intra- and trans-national variations in ICU  
23  
24 476 resources, staffing and organization exist. Second, the case report form used in  
25  
26 477 PRoVENT-iMIC was designed so that it would not induce excessive work-load for the  
27  
28 478 participating centres. Therefore, we decided not to collect data regarding extra-  
29  
30 479 pulmonary complications and hospital-discharge outcomes, neither the amounts of  
31  
32 480 sedation used and sedation levels. Similarly, due to the time window restricted to the  
33  
34 481 ICU stay, we will apply the LIPS at ICU admission and not in the first 6 hours after  
35  
36 482 hospital admission, as originally designed. Mortality may be underestimated in some  
37  
38 483 settings where due to local practices there is the possibility to be discharged home in  
39  
40 484 case of terminal conditions or family decision. To address this we made sure the data  
41  
42 485 collection form captures this event whenever it represents the reason of discharge.  
43  
44 486 Third, due to the limitation of laboratory data we will have a limited dataset that will not  
45  
46 487 comprise daily severity scores useful for statistical controlling purposes. Also, the  
47  
48 488 conceivable limitation in blood gas analysis and radiology exams may limit the  
49  
50 489 documentation of insurgence or worsening of ARDS and other pulmonary complications.  
51  
52  
53  
54  
55  
56  
57  
58  
59  
60

1  
2  
3 490 Fourth, as in patients on pressure-control modes flow might not reach zero during  
4  
5 491 inspiration, Pmax might overestimate alveolar pressure, hence overestimating driving  
6  
7 492 pressure. An end-inspiratory occlusion could solve this problem, but is almost never  
8  
9  
10 493 performed in many centers. As this study only uses data that is collected as part of  
11  
12 494 standard care, all analysis regarding driving pressure will be done separately for patients  
13  
14 495 on pressure-control modes and volume-control modes. Finally, we cannot exclude that  
15  
16 496 ventilator settings applied by treating physicians might be biased by the participation in  
17  
18 497 the study, a problem that also existed in prior multinational studies [11,12]. Also  
19  
20 498 participation in international studies like PRoVENT-iMIC always bears the risk of biased  
21  
22 499 to those centres that do not fully or reliably represent ICU-care in general in the  
23  
24 500 participating countries.  
25  
26  
27

28 501  
29  
30  
31  
32  
33  
34  
35  
36  
37  
38  
39  
40  
41  
42  
43  
44  
45  
46  
47  
48  
49  
50  
51  
52  
53  
54  
55  
56  
57  
58  
59  
60

1  
2  
3 502 **CONCLUSIONS**  
4

5 503 P<sub>RO</sub>VENT-iMIC is designed to understand the epidemiology, practice of ventilation, and  
6  
7 504 outcomes of critically-ill patients receiving invasive ventilation in a large set of South  
8  
9  
10 505 Asian countries. Results of this study could help identify practices that may best explain  
11  
12 506 differences in outcomes, and could be used in designing new trials of ventilation in these  
13  
14 507 settings.  
15  
16

17 508  
18  
19  
20  
21  
22  
23  
24  
25  
26  
27  
28  
29  
30  
31  
32  
33  
34  
35  
36  
37  
38  
39  
40  
41  
42  
43  
44  
45  
46  
47  
48  
49  
50  
51  
52  
53  
54  
55  
56  
57  
58  
59  
60

1  
2  
3 509 **Author affiliations**  
4

5 510 **Contributors**  
6

7  
8 511 LP, AGA, ASN, AMD and MJS were equally responsible for writing of the manuscript  
9  
10 512 and participated in study design. FP, PP participated in study design and assisted in  
11  
12 513 writing of the manuscript. AA, AB, KC, AF, RaH, ReH, MH, HAI, KI, SI, GK, BK, HM, BN,  
13  
14 514 RP, SS, LT, SG, NNT, NMY, MGdA reviewed the manuscript and agreed with  
15  
16  
17 515 submission.  
18

19 516

20  
21 517 **Funding**  
22

23  
24 518 This research received no specific grant from any funding agency in the public,  
25  
26 519 commercial or not-for profit sectors.  
27

28 520

29  
30 521 **Competing interests**  
31

32  
33 522 None  
34

35 523

36  
37 524 **Ethics approval**  
38

39  
40 525 The Oxford Tropical Research Ethical Committee (OxTREC) at the University of Oxford,  
41  
42 526 United Kingdom, exempted the study from ethical review on the 9<sup>th</sup> of June 2017. IRB  
43  
44 527 approval was obtained from Sri Lanka, Bangladesh and Malaysia and is underway in  
45  
46 528 Myanmar, Iran, India, Vietnam, Thailand, Nepal, Pakistan and Maldives.  
47

48  
49 529  
50  
51  
52  
53  
54  
55  
56  
57  
58  
59  
60

530 **REFERENCES**

- 531 1 Slutsky AS, Ranieri VM. Ventilator-induced lung injury. *N Engl J Med*  
532 2014;**370**:980. doi:10.1056/NEJMc1400293
- 533 2 Serpa N, Schultz M, Slutsky A. Current concepts of protective ventilation during  
534 general anaesthesia. *Swiss Med Wkly* 2015;**145**:w14211.  
535 doi:10.4414/smw.2015.14211
- 536 3 Putensen C, Theuerkauf N, Zinserling J, *et al.* Meta-analysis: ventilation strategies  
537 and outcomes of the acute respiratory distress syndrome and acute lung injury.  
538 *Ann Intern Med* 2009;**151**:566–76.
- 539 4 Serpa Neto A, Cardoso SO, Manetta JA, *et al.* Association Between Use of Lung-  
540 Protective Ventilation With Lower Tidal Volumes and Clinical Outcomes Among  
541 Patients Without Acute Respiratory Distress Syndrome. *JAMA* 2012;**308**:1651.  
542 doi:10.1001/jama.2012.13730
- 543 5 Güldner A, Kiss T, Serpa Neto A, *et al.* Intraoperative Protective Mechanical  
544 Ventilation for Prevention of Postoperative Pulmonary Complications.  
545 *Anesthesiology* 2015;**123**:692–713. doi:10.1097/ALN.0000000000000754
- 546 6 Briel M, Meade M, Mercat A, *et al.* Higher vs lower positive end-expiratory  
547 pressure in patients with acute lung injury and acute respiratory distress  
548 syndrome: systematic review and meta-analysis. *JAMA* 2010;**303**:865–73.  
549 doi:10.1001/jama.2010.218
- 550 7 Ferguson ND. Low Tidal Volumes for All? *JAMA* 2012;**308**:1689.  
551 doi:10.1001/jama.2012.14509
- 552 8 Serpa Neto A, Nagtzaam L, Schultz MJ. Ventilation with lower tidal volumes for  
553 critically ill patients without the acute respiratory distress syndrome: a systematic

- 1  
2  
3 554 translational review and meta-analysis. *Curr Opin Crit Care* 2014;**20**:25–32.  
4  
5 555 doi:10.1097/MCC.0000000000000044  
6  
7 556 9 Dellinger RP, Levy MM, Rhodes A, *et al*. Surviving sepsis campaign: International  
8  
9 guidelines for management of severe sepsis and septic shock, 2012. *Intensive*  
10 557  
11 *Care Med* 2013;**39**:165–228. doi:10.1007/s00134-012-2769-8  
12 558  
13  
14 559 10 Amato MBP, Meade MO, Slutsky AS, *et al*. Driving pressure and survival in the  
15  
16 acute respiratory distress syndrome. *N Engl J Med* 2015;**372**:747–55.  
17 560  
18 doi:10.1056/NEJMsa1410639  
19 561  
20  
21 562 11 Bellani G, Gattinoni L, Haren F Van, *et al*. Epidemiology, Patterns of Care, and  
22  
23 Mortality for Patients With Acute Respiratory Distress Syndrome in Intensive Care  
24 563  
25 Units in 50 Countries. *JAMA* 2016;**315**:2526–33.  
26 564  
27  
28 565 12 Neto AS, Barbas CS V, Simonis FD, *et al*. Epidemiological characteristics, practice  
29  
30 of ventilation, and clinical outcome in patients at risk of acute respiratory distress  
31 566  
32 syndrome in intensive care units from 16 countries (PRoVENT): an international,  
33 567  
34 multicentre, prospective study. *Lancet Respir Med* 2016;**4**:882–93.  
35 568  
36 doi:10.1016/S2213-2600(16)30305-8  
37 569  
38  
39 570 13 Epidemiology, practice of ventilation and outcome for patients at increased risk of  
40  
41 postoperative pulmonary complications. *Eur J Anaesthesiol* 2017;**34**:492–507.  
42 571  
43 doi:10.1097/EJA.0000000000000646  
44 572  
45  
46 573 14 Sinclair JR, Watters DA, Davison M. Outcome of mechanical ventilation in Central  
47  
48 Africa. *Ann R Coll Surg Engl* 1988;**70**:76–9.  
49 574  
50  
51 575 15 Rajapakse VP, Wijsekera S. Outcome of mechanical ventilation in Sri Lanka. *Ann*  
52  
53 *R Coll Surg Engl* 1989;**71**:344–6.  
54 576  
55  
56 577 16 Sudarsanam TD, Jeyaseelan L, Thomas K, *et al*. Predictors of mortality in  
57  
58  
59  
60

- 1  
2  
3 578 mechanically ventilated patients. *Postgrad Med J* 2005;**81**:780–3.  
4  
5 579 doi:10.1136/pgmj.2005.033076  
6  
7 580 17 Azevedo LC, Park M, Salluh JI, *et al*. Clinical outcomes of patients requiring  
8 ventilatory support in Brazilian intensive care units: a multicenter, prospective,  
9  
10 581 cohort study. *Crit Care* 2013;**17**:R63. doi:10.1186/cc12594  
11  
12 582  
13  
14 583 18 Karthikeyan B, Kadiravan T, Deepanjali S, *et al*. Case-Mix, Care Processes, and  
15 Outcomes in Medically-Ill Patients Receiving Mechanical Ventilation in a Low-  
16  
17 584 Resource Setting from Southern India: A Prospective Clinical Case Series. *PLoS*  
18  
19 585 *One* 2015;**10**:e0135336. doi:10.1371/journal.pone.0135336  
20  
21 586  
22  
23 587 19 Serpa Neto A, Schultz MJ, Festic E. Ventilatory support of patients with sepsis or  
24 septic shock in resource-limited settings. *Intensive Care Med* 2016;**42**:100–3.  
25  
26 588 doi:10.1007/s00134-015-4070-0  
27  
28 589  
29  
30 590 20 Haniffa R, Lubell Y, Cooper BS, *et al*. Impact of a structured ICU training  
31 programme in resource-limited settings in Asia. *PLoS One* 2017;**12**:e0173483.  
32  
33 591 doi:10.1371/journal.pone.0173483  
34  
35 592  
36  
37 593 21 Dünser MW, Baelani I, Ganbold L, *et al*. A review and analysis of intensive care  
38 medicine in the least developed countries\*. *Crit Care Med* 2006;**34**:1234–42.  
39  
40 594 doi:10.1097/01.CCM.0000208360.70835.87  
41  
42 595  
43  
44 596 22 The World Bank. World Bank Country Classification.  
45  
46 597 <https://datahelpdesk.worldbank.org/knowledgebase/topics/19280-country->  
47  
48 598 classification (accessed 17 Dec 2017).  
49  
50 599 23 Gajic O, Dabbagh O, Park PK, *et al*. Early identification of patients at risk of acute  
51 lung injury: evaluation of lung injury prediction score in a multicenter cohort study.  
52  
53 600  
54  
55 601 *Am J Respir Crit Care Med* 2011;**183**:462–70. doi:10.1164/rccm.201004-0549OC  
56  
57  
58  
59  
60



- 1  
2  
3 602 24 The ARDS Definition Task Force\*, Ranieri VM, Rubenfeld GD, *et al.* Acute  
4  
5 603 respiratory distress syndrome: the Berlin Definition. *JAMA J Am Med Assoc*  
6  
7 604 2012;**307**:1. doi:10.1001/jama.2012.5669  
8  
9  
10 605 25 Ashizawa K, Hayashi K, Aso N, *et al.* Lobar atelectasis: diagnostic pitfalls on chest  
11  
12 606 radiography. *Br J Radiol* 2001;**74**:89–97. doi:10.1259/bjr.74.877.740089  
13  
14 607 26 Riviello ED, Kiviri W, Twagirumugabe T, *et al.* Hospital Incidence and Outcomes of  
15  
16 608 the Acute Respiratory Distress Syndrome Using the Kigali Modification of the  
17  
18 609 Berlin Definition. *Am J Respir Crit Care Med* 2016;**193**:52–9.  
19  
20 610 doi:10.1164/rccm.201503-0584OC  
21  
22  
23 611 27 Rice TW, Wheeler AP, Bernard GR, *et al.* Comparison of the SpO<sub>2</sub>/FIO<sub>2</sub> ratio  
24  
25 612 and the PaO<sub>2</sub>/FIO<sub>2</sub> ratio in patients with acute lung injury or ARDS. *Chest*  
26  
27 613 2007;**132**:410–7. doi:10.1378/chest.07-0617  
28  
29  
30 614 28 Harris PA, Taylor R, Thielke R, *et al.* Research electronic data capture (REDCap)-  
31  
32 615 -a metadata-driven methodology and workflow process for providing translational  
33  
34 616 research informatics support. *J Biomed Inform* 2009;**42**:377–81.  
35  
36 617 doi:10.1016/j.jbi.2008.08.010  
37  
38  
39 618 29 Von Elm E, Altman DG, Egger M, *et al.* The Strengthening the Reporting of  
40  
41 619 Observational Studies in Epidemiology (STROBE) statement: guidelines for  
42  
43 620 reporting observational studies. *Lancet* 2007;**370**:1453–7. doi:10.1016/S0140-  
44  
45 621 6736(07)61602-X  
46  
47  
48 622 30 Euser AM, Zoccali C, Jager KJ, *et al.* Cohort Studies: Prospective versus  
49  
50 623 Retrospective. *Nephron Clin Pract* 2009;**113**:c214–7. doi:10.1159/000235241  
51  
52  
53 624 31 Gajic O, Dara SI, Mendez JL, *et al.* Ventilator-associated lung injury in patients  
54  
55 625 without acute lung injury at the onset of mechanical ventilation. *Crit Care Med*  
56  
57  
58  
59  
60

- 1  
2  
3 626 2004;**32**:1817–24.  
4  
5 627 32 Rush B, Biagioni BJ, Berger L, *et al.* Mechanical Ventilation Outcomes in Patients  
6  
7 628 With Pulmonary Hypertension in the United States: A National Retrospective  
8  
9 629 Cohort Analysis. *J Intensive Care Med* 2017;**32**:588–92.  
10  
11 630 doi:10.1177/0885066616653926  
12  
13  
14 631 33 Pesaro AEP, Katz M, Katz JN, *et al.* Mechanical Ventilation and Clinical Outcomes  
15  
16 632 in Patients with Acute Myocardial Infarction: A Retrospective Observational Study.  
17  
18 633 *PLoS One* 2016;**11**:e0151302. doi:10.1371/journal.pone.0151302  
19  
20  
21 634 34 Adhikari NKJ, Fowler RA, Bhagwanjee S, *et al.* Critical care and the global burden  
22  
23 635 of critical illness in adults. *Lancet (London, England)* 2010;**376**:1339–46.  
24  
25 636 doi:10.1016/S0140-6736(10)60446-1  
26  
27  
28 637 35 Arabi YM, Phua J, Koh Y, *et al.* Structure, Organization, and Delivery of Critical  
29  
30 638 Care in Asian ICUs\*. *Crit Care Med* 2016;**44**:e940–8.  
31  
32 639 doi:10.1097/CCM.0000000000001854  
33  
34  
35 640 36 Acute Respiratory Distress Syndrome Network, Brower RG, Matthay MA, *et al.*  
36  
37 641 Ventilation with Lower Tidal Volumes as Compared with Traditional Tidal Volumes  
38  
39 642 for Acute Lung Injury and the Acute Respiratory Distress Syndrome. *N Engl J Med*  
40  
41 643 2000;**342**:1301–8. doi:10.1056/NEJM200005043421801  
42  
43  
44 644 37 National Heart, Lung, and Blood Institute Acute Respiratory Distress Syndrome  
45  
46 645 (ARDS) Clinical Trials Network, Wiedemann HP, Wheeler AP, *et al.* Comparison  
47  
48 646 of two fluid-management strategies in acute lung injury. *N Engl J Med*  
49  
50 647 2006;**354**:2564–75. doi:10.1056/NEJMoa062200  
51  
52  
53 648 38 Girard TD, Kress JP, Fuchs BD, *et al.* Efficacy and safety of a paired sedation and  
54  
55 649 ventilator weaning protocol for mechanically ventilated patients in intensive care  
56  
57  
58  
59  
60

- 1  
2  
3 650 (Awakening and Breathing Controlled trial): a randomised controlled trial. *Lancet*  
4  
5 651 (*London, England*) 2008;**371**:126–34. doi:10.1016/S0140-6736(08)60105-1  
6  
7 652 39 Esteban A, Frutos-Vivar F, Muriel A, *et al.* Evolution of Mortality over Time in  
8  
9 Patients Receiving Mechanical Ventilation. *Am J Respir Crit Care Med*  
10 653  
11 2013;**188**:220–30. doi:10.1164/rccm.201212-2169OC  
12 654  
13  
14 655 40 Gajic O, Dabbagh O, Park PK, *et al.* Early Identification of Patients at Risk of  
15  
16 Acute Lung Injury: Evaluation of Lung Injury Prediction Score in a Multicenter  
17 656  
18 Cohort Study. *Am J Respir Crit Care Med* 2010;;1–33. doi:10.1164/rccm.201004-  
19 657  
20 0549OC  
21 658  
22  
23 659 41 Festic E, Kor DJ, Gajic O. Prevention of acute respiratory distress syndrome. *Curr*  
24  
25 *Opin Crit Care* 2015;**21**:82–90. doi:10.1097/MCC.000000000000174  
26 660  
27  
28 661  
29  
30 662  
31  
32  
33  
34  
35  
36  
37  
38  
39  
40  
41  
42  
43  
44  
45  
46  
47  
48  
49  
50  
51  
52  
53  
54  
55  
56  
57  
58  
59  
60

1  
2  
3 663 **FIGURE LEGENDS**  
4

5 664 **Figure 1:** Flowchart of inclusion of PRoVENT-iMIC  
6

7 665 Abbreviations: MV, Mechanical Ventilation; LIPS, Lung Injury Prediction Score; ARDS,  
8  
9  
10 666 Acute Respiratory Distress Syndrome.  
11

12 667  
13

14 668 **Figure 2.** Sequence of data submission in the electronic case report form  
15

16 669 Abbreviations: LIPS, Lung Injury Prediction Score; MV, mechanical ventilation, ARDS,  
17  
18  
19 670 Acute Respiratory Distress Syndrome; CPE, cardiogenic pulmonary oedema; ICU,  
20  
21 671 Intensive Care Unit.  
22

23 672  
24

25 673  
26  
27  
28  
29  
30  
31  
32  
33  
34  
35  
36  
37  
38  
39  
40  
41  
42  
43  
44  
45  
46  
47  
48  
49  
50  
51  
52  
53  
54  
55  
56  
57  
58  
59  
60

674 **Table 1.** Lung Injury Prediction Score (LIPS) calculation worksheet<sup>17,34</sup>  
 675

| <b>Predisposing Conditions</b> | <b>Score</b> | <b>Risk Modifiers</b>               | <b>Score</b> |
|--------------------------------|--------------|-------------------------------------|--------------|
| Shock                          | 2            | Alcohol Abuse                       | 1            |
| Aspiration                     | 2            | BMI > 30 kg/m <sup>2</sup>          | 1            |
| Sepsis                         | 1            | Hypoalbuminemia                     | 1            |
| Pneumonia                      | 1.5          | Chemotherapy                        | 1            |
| <b>High-Risk Surgery</b>       |              | FiO <sub>2</sub> > 0.35 (> 4 l/min) | 2            |
| Orthopedic Spine               | 1            | RR > 30 bpm                         | 1.5          |
| Acute Abdomen                  | 2            | SpO <sub>2</sub> < 95%              | 1            |
| Cardiac                        | 2.5          | Acidosis (pH < 7.35)                | 1.5          |
| Aortic Vascular                | 3.5          | Diabetes Mellitus*                  | - 1          |
| Emergency surgery              | 1.5          |                                     |              |
| <b>High-Risk Trauma</b>        |              |                                     |              |
| Traumatic Brain Injury         | 2            |                                     |              |
| Smoke Inhalation               | 2            |                                     |              |
| Near-Drowning                  | 2            |                                     |              |
| Lung Contusion                 | 1.5          |                                     |              |
| Multiple Fractures             | 1.5          |                                     |              |

676 Abbreviations: BMI, body mass index; FiO<sub>2</sub>, fraction of inspired oxygen; RR, respiratory  
 677 rate; SpO<sub>2</sub>, pulse oximetry oxygen saturation.

678 \*(To consider only in septic patients)  
 679

680 **Table 2a. The Berlin definition of ARDS**

| Criteria                   | Definition                                                                                                                                                                               |                                                |                                          |
|----------------------------|------------------------------------------------------------------------------------------------------------------------------------------------------------------------------------------|------------------------------------------------|------------------------------------------|
| Time                       | Within one week of a known clinical insult, or new/worsening respiratory symptoms                                                                                                        |                                                |                                          |
| Chest imaging <sup>1</sup> | Bilateral opacities not fully explained by effusions, lobar/lung collapse or nodules                                                                                                     |                                                |                                          |
| Origin of oedema           | Respiratory failure not fully explained by cardiac failure or fluid overload; need objective assessment to exclude hydrostatic oedema if no risk factor present (e.g., echocardiography) |                                                |                                          |
| Oxygenation <sup>2</sup>   | Mild                                                                                                                                                                                     | Moderate                                       | Severe                                   |
|                            | 200 < PaO <sub>2</sub> /FiO <sub>2</sub> ≤ 300                                                                                                                                           | 100 < PaO <sub>2</sub> /FiO <sub>2</sub> ≤ 200 | PaO <sub>2</sub> /FiO <sub>2</sub> ≤ 100 |
|                            | PEEP or CPAP <sup>3</sup> ≥ 5 cm H <sub>2</sub> O                                                                                                                                        | PEEP ≥ 5 cm H <sub>2</sub> O                   | PEEP ≥ 5 cm H <sub>2</sub> O             |

Abbreviations: ARDS, acute respiratory distress syndrome; PaO<sub>2</sub>, partial pressure of arterial oxygen; FiO<sub>2</sub>, fraction of inspired oxygen; PEEP, positive end-expiratory pressure; CPAP, continuous positive airway pressure.

<sup>1</sup>chest X-ray or CT scan; <sup>2</sup>if altitude higher than 1,000 meters, correction factor should be made as follows: PaO<sub>2</sub>/FiO<sub>2</sub> x (barometric pressure/760); <sup>3</sup>this may be delivered noninvasively in the mild acute respiratory distress syndrome

681  
682  
683 **Table 2b. Alternative Oxygenation criteria (if PaO<sub>2</sub> data unavailable)**  
684

| Criteria           | Mild ARDS                                      | Moderate ARDS                                  | Severe ARDS                              |
|--------------------|------------------------------------------------|------------------------------------------------|------------------------------------------|
| <b>Oxygenation</b> | 235 < SpO <sub>2</sub> /FiO <sub>2</sub> ≤ 315 | 150 < SpO <sub>2</sub> /FiO <sub>2</sub> ≤ 235 | SpO <sub>2</sub> /FiO <sub>2</sub> ≤ 150 |
|                    | PEEP or CPAP ≥ 5 cmH <sub>2</sub> O            | PEEP ≥ 5 cmH <sub>2</sub> O                    | PEEP ≥ 5 cmH <sub>2</sub> O              |

685 Abbreviations: SpO<sub>2</sub>, pulse oximetry oxygen saturation; FiO<sub>2</sub>, fraction of inspired oxygen

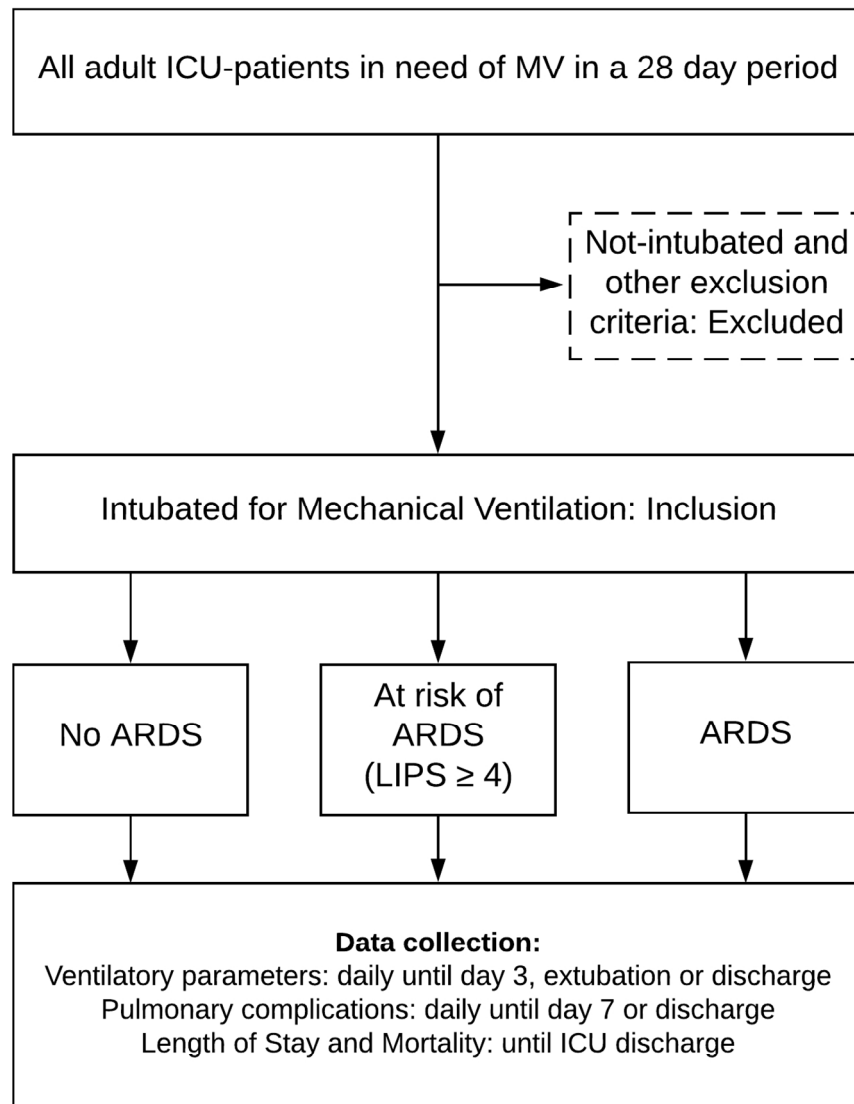

Figure 1. Flowchart of inclusion of PROVENT-iMIC<sup>†</sup>. Abbreviations: MV, Mechanical Ventilation; LIPS, Lung Injury Prediction Score; ARDS, Acute Respiratory Distress Syndrome.<sup>†</sup>

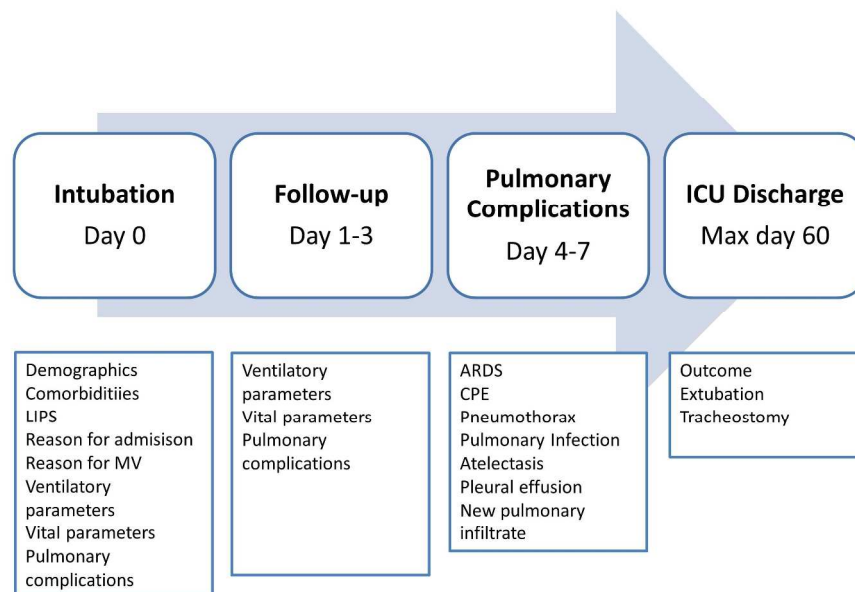

Figure 2. Sequence of data submission in the electronic case report form!! †. Abbreviations: LIPS, Lung Injury Prediction Score; MV, mechanical ventilation, ARDS, Acute Respiratory Distress Syndrome; CPE, cardiogenic pulmonary oedema; ICU, Intensive Care Unit. !! †

254x190mm (300 x 300 DPI)
